# Supplementary material
Source: PubMed Central journal article supplement (PMC8875297)
Supplement: NIHMS1776646-supplement-Sup_Fig__1.pdf [file NIHMS1776646-supplement-Sup_Fig__1.pdf]

**Supplementary information**

---

**CRL4 is a master regulator of D-type cyclins**

---

In the format provided by the  
authors and unedited

**Figure 1a**

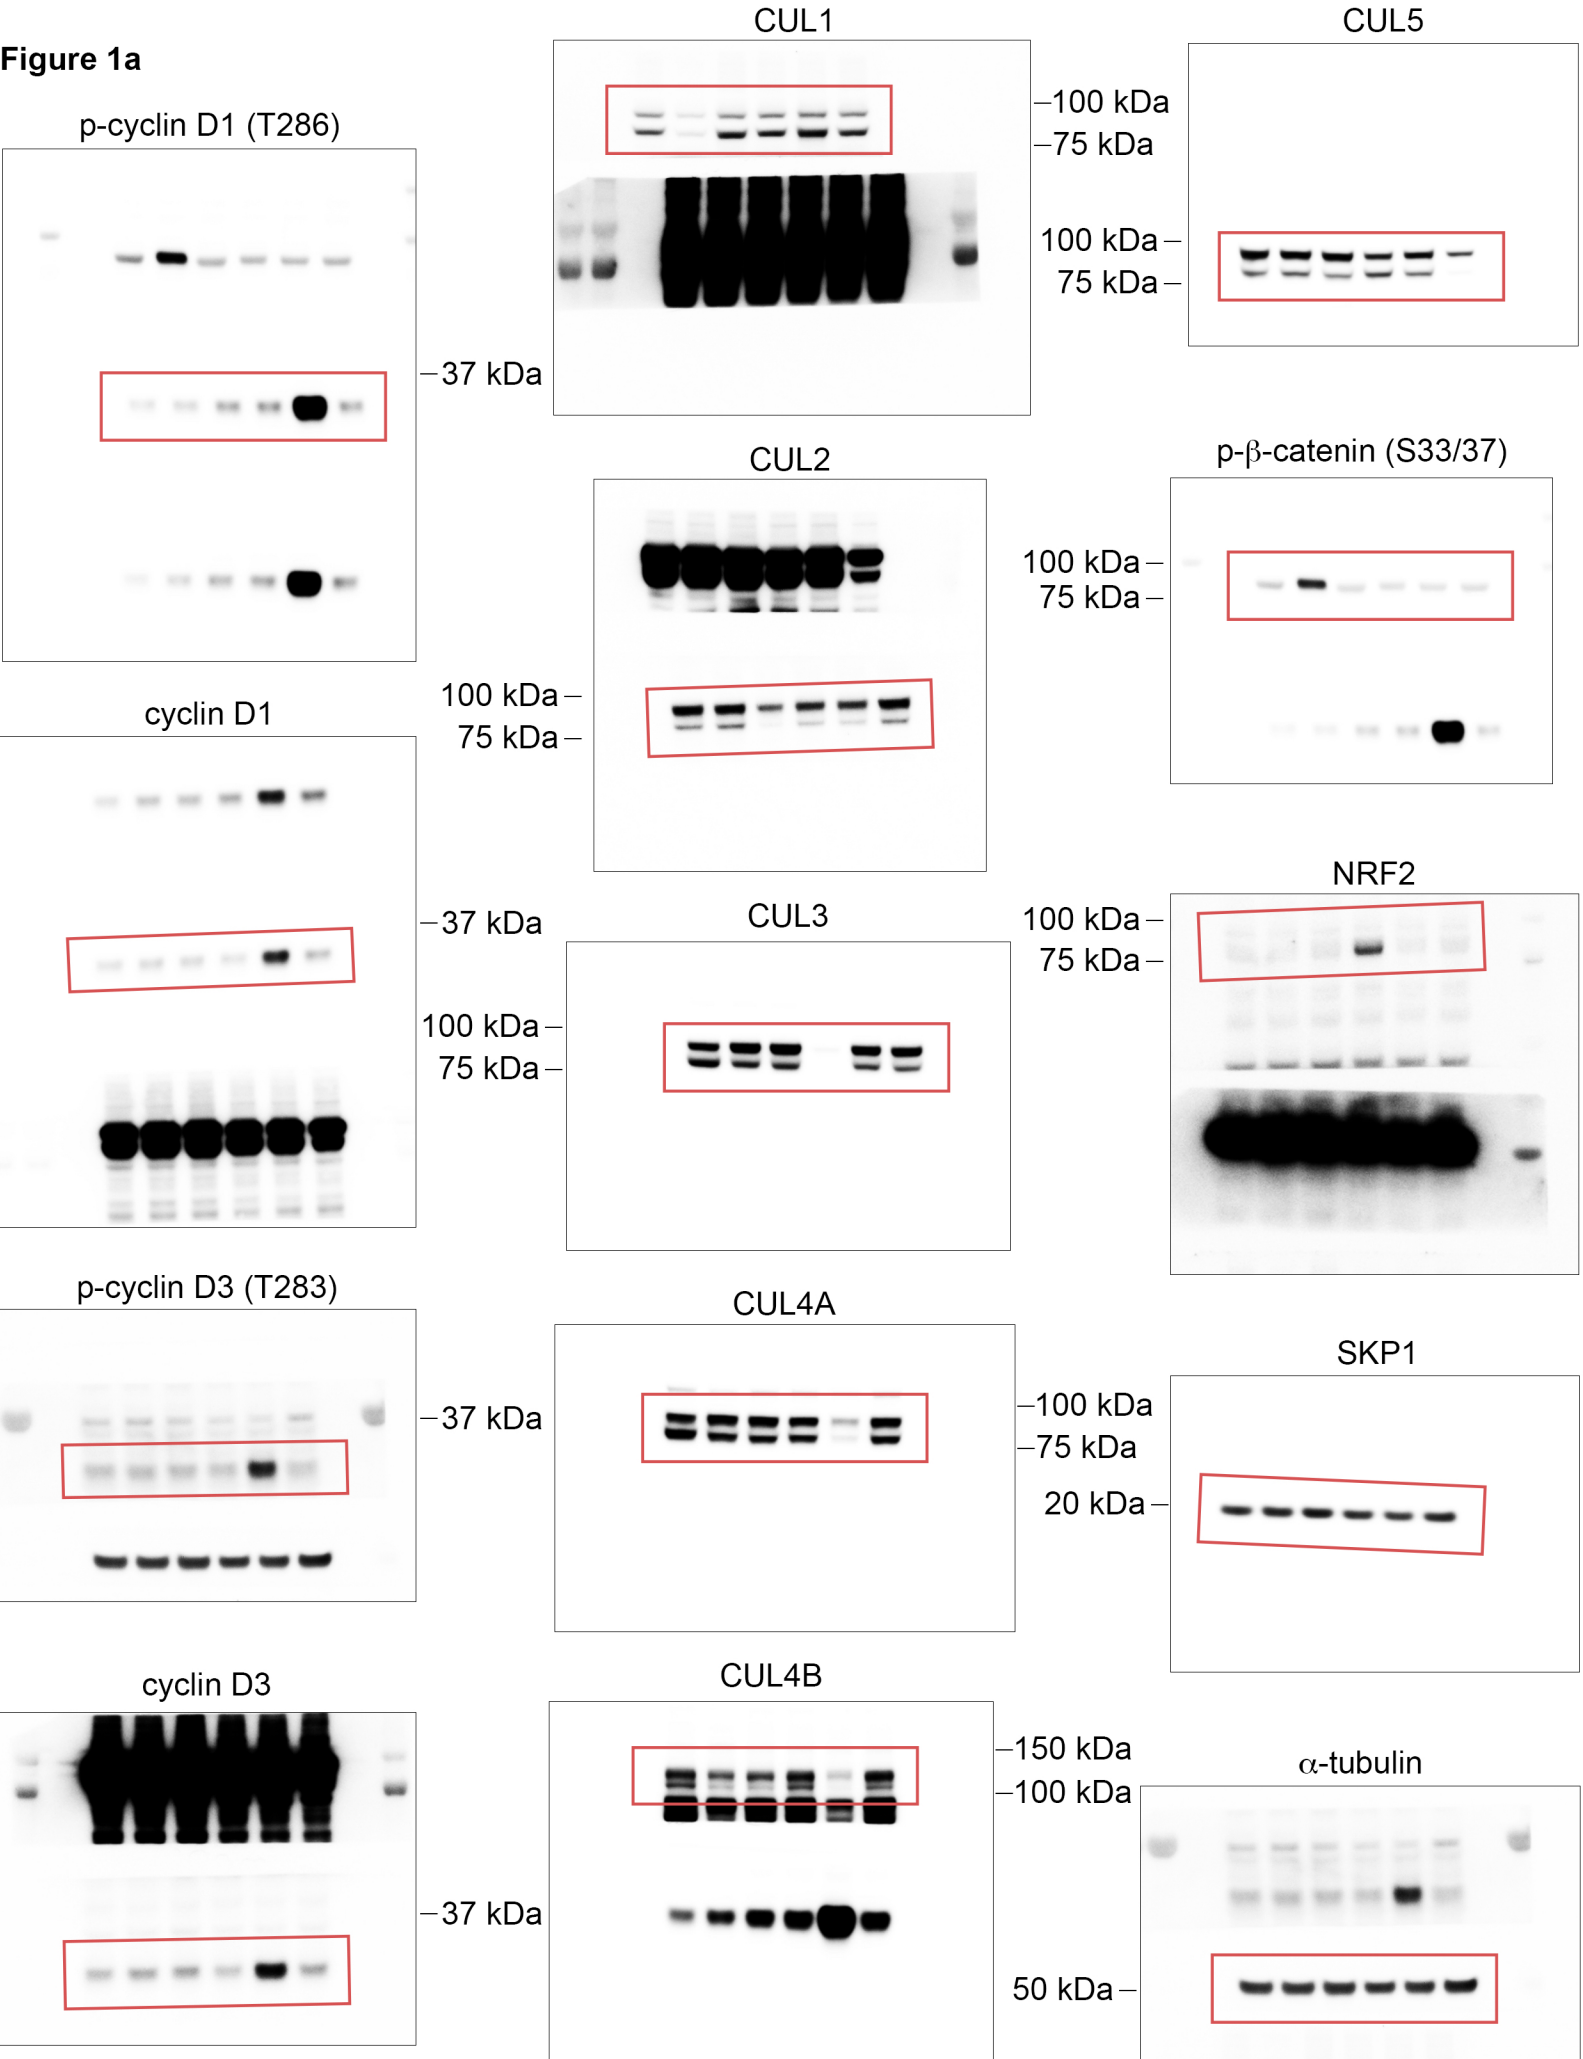

**Figure 2a**

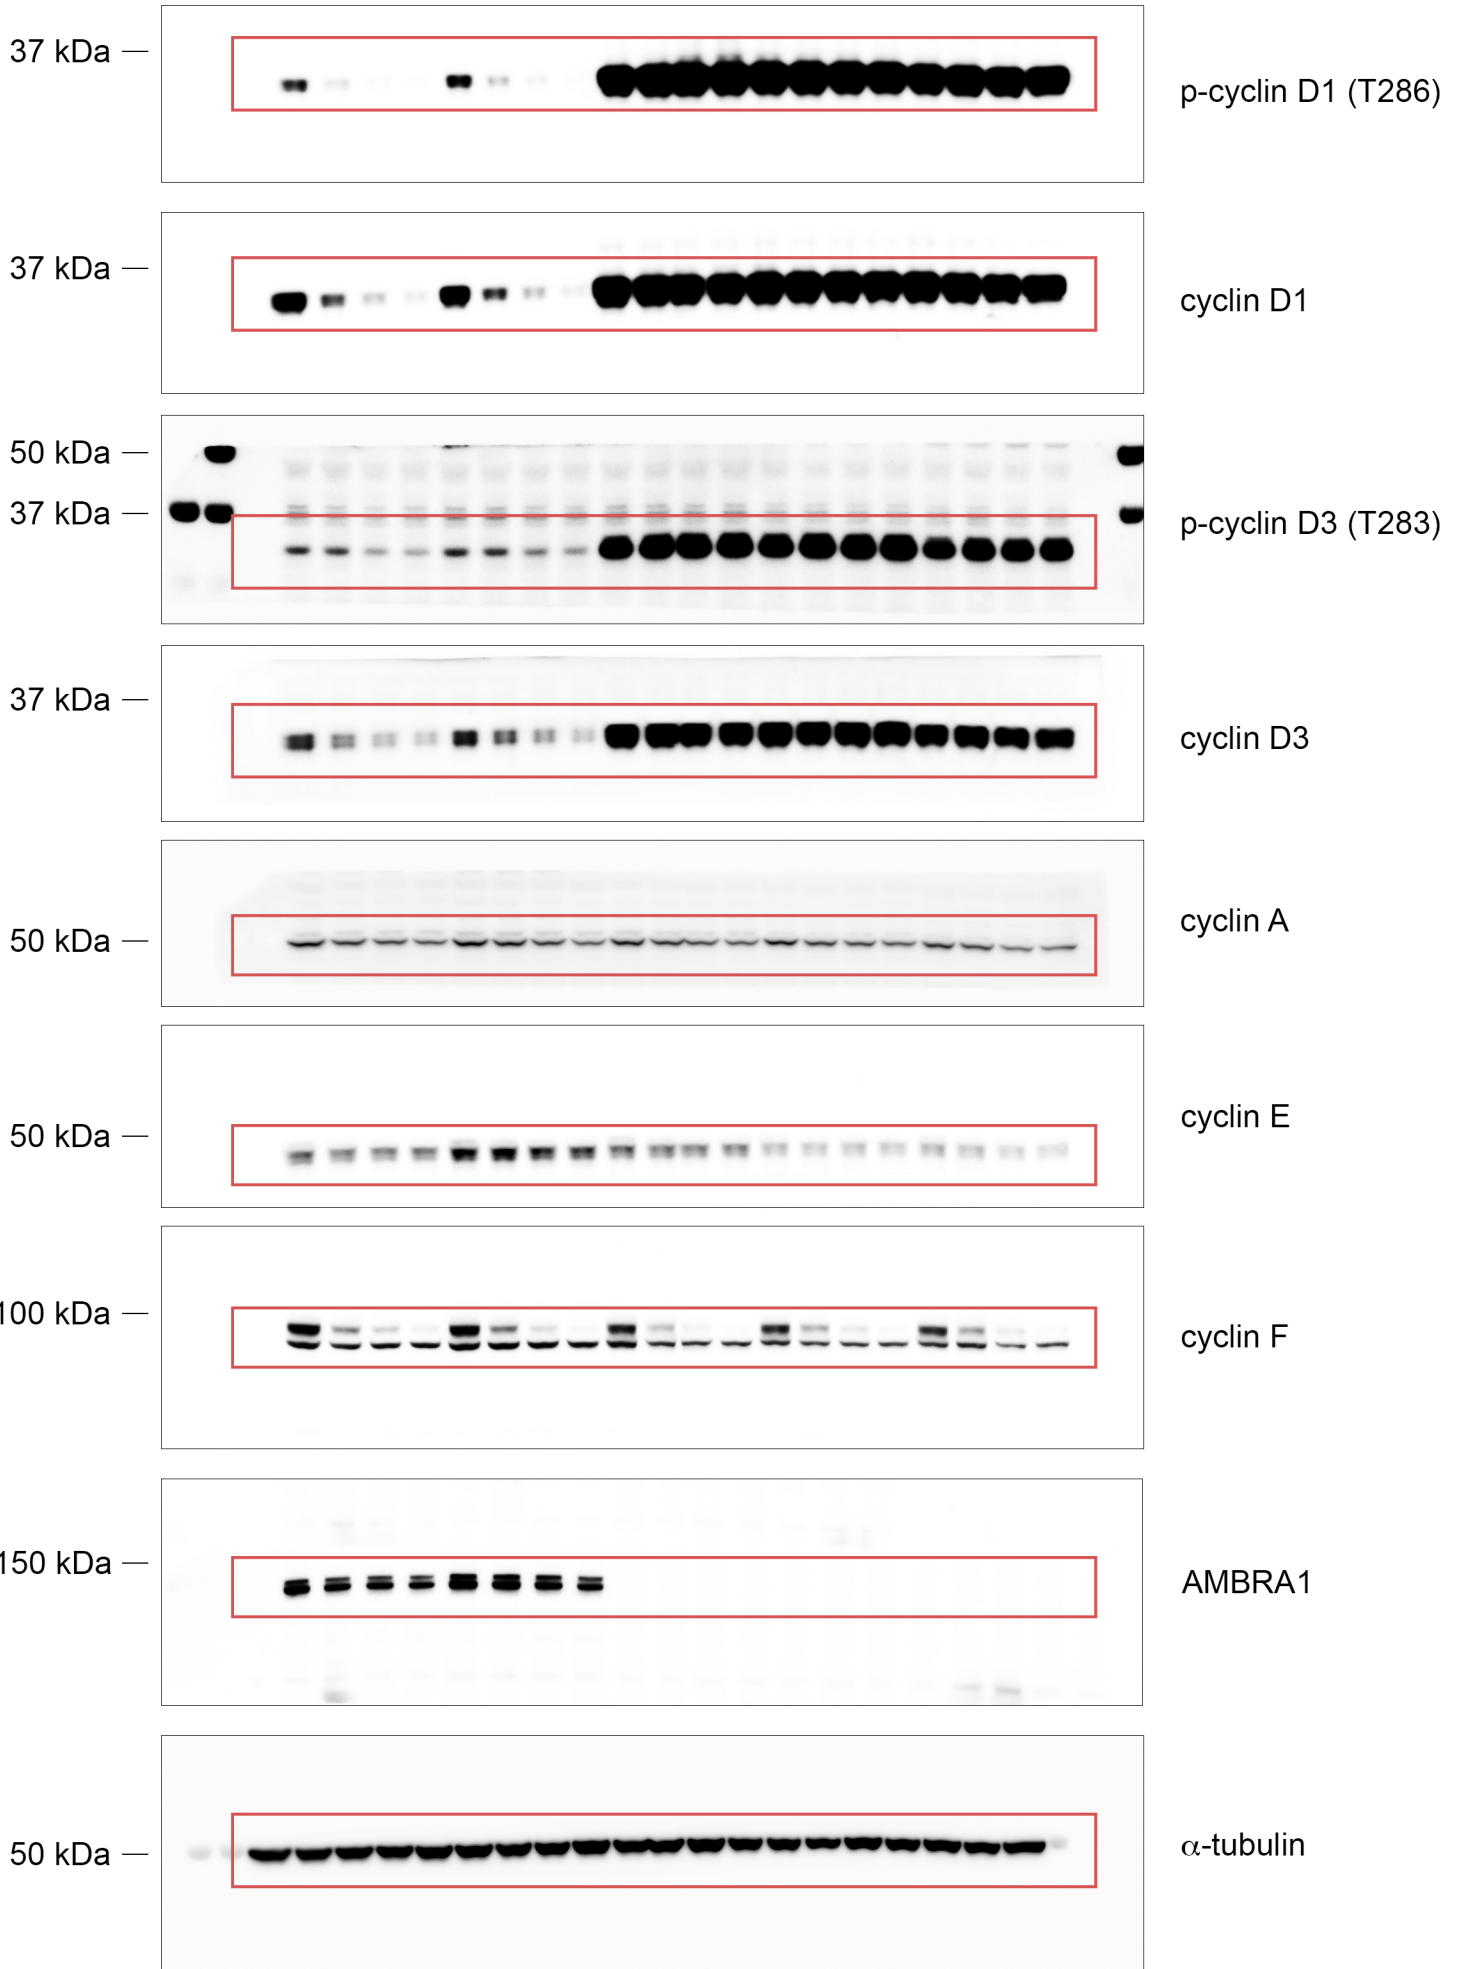

**Figure 2b**

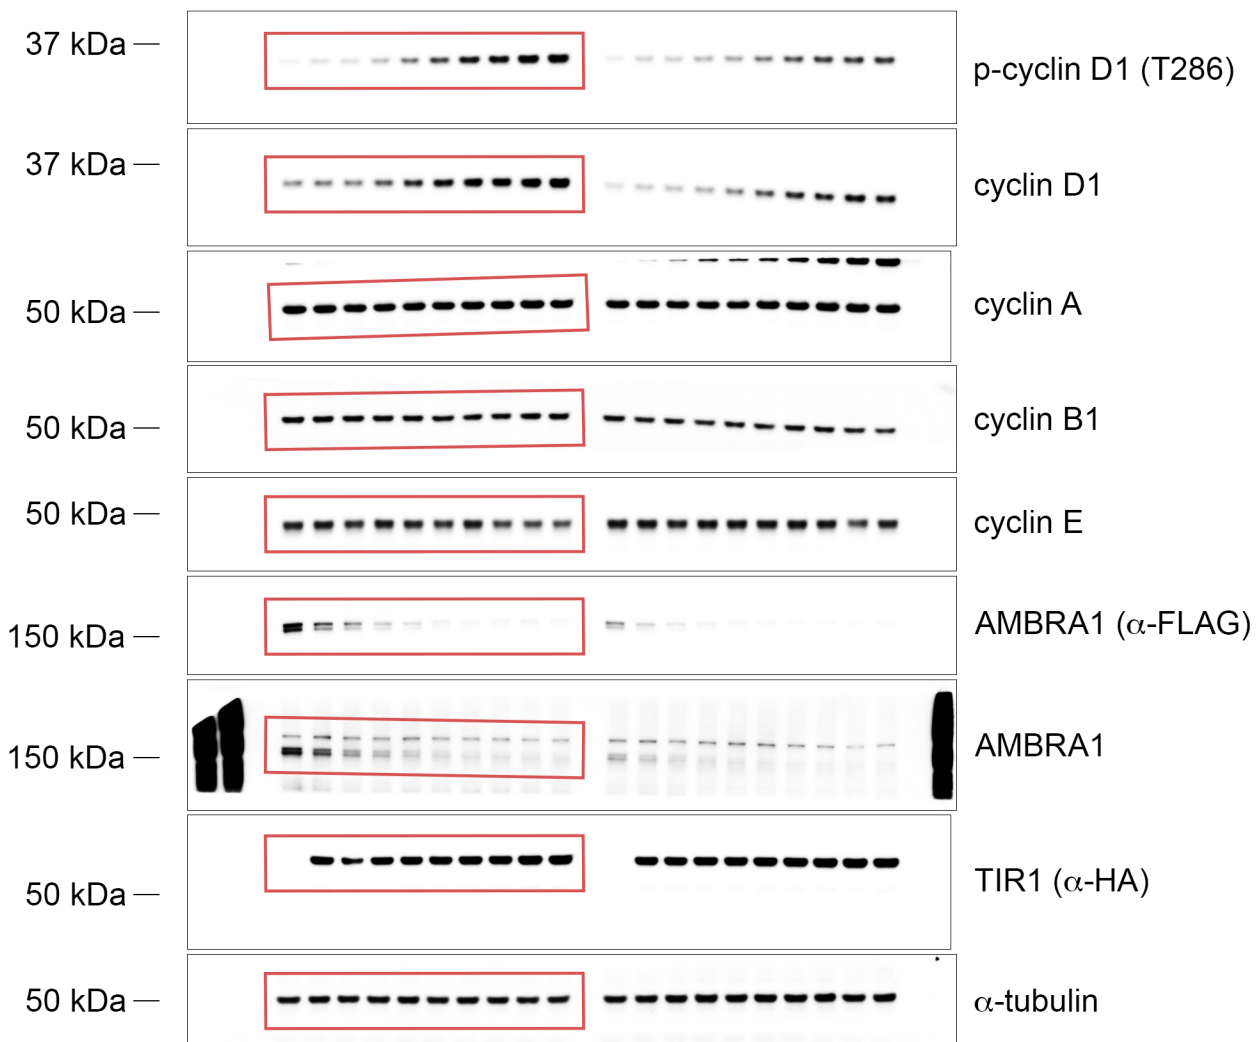

**Figure 2c**

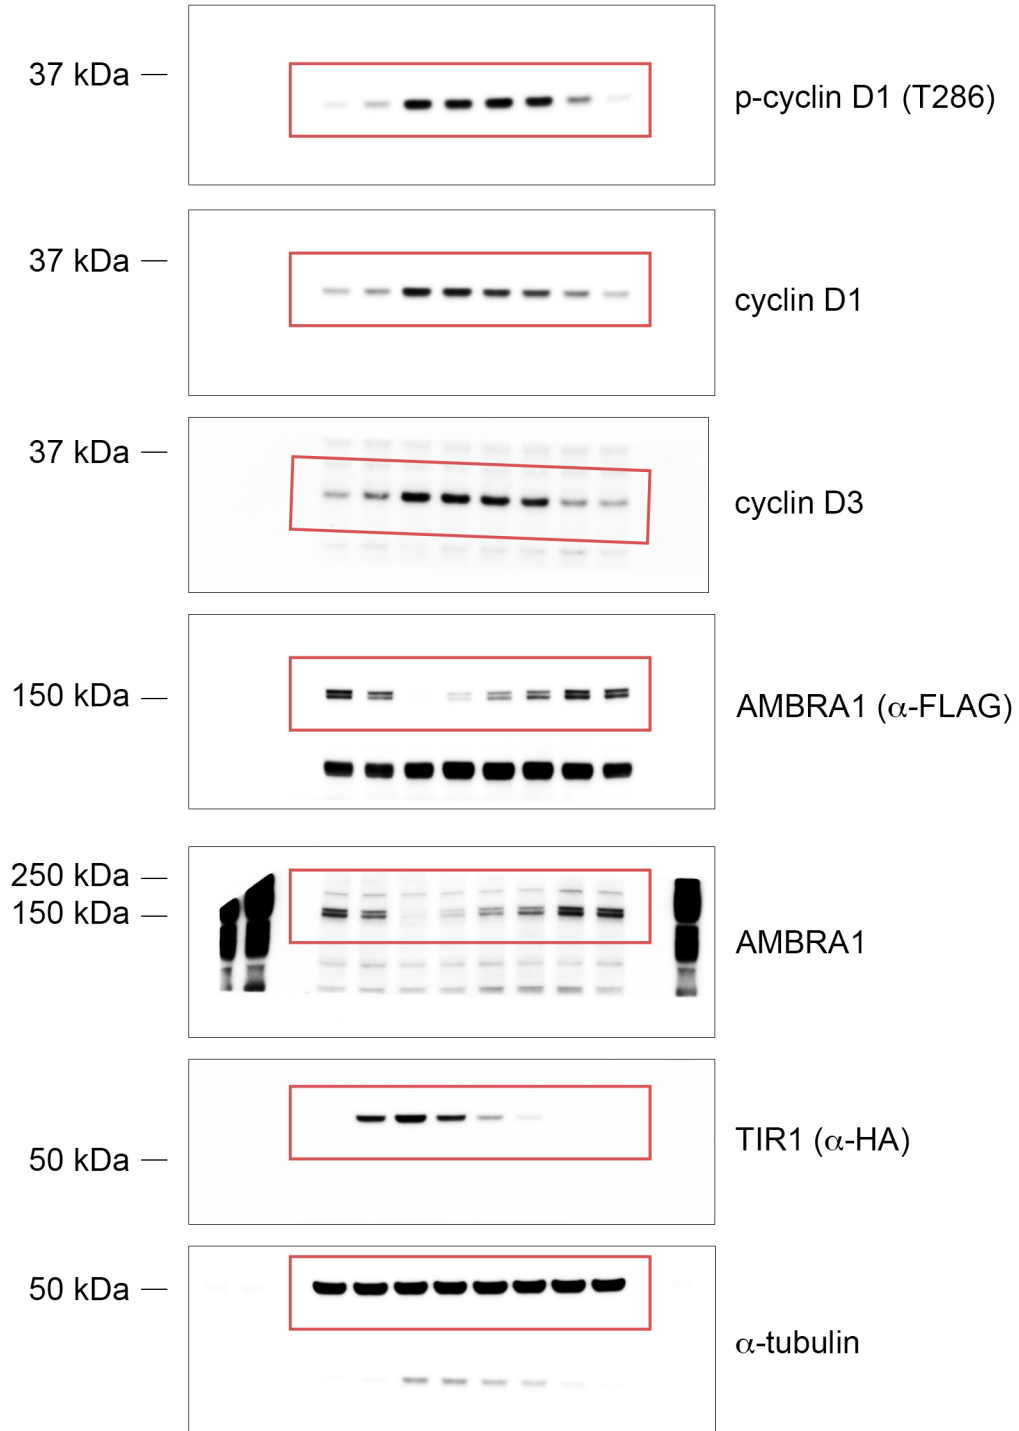

Figure 2d

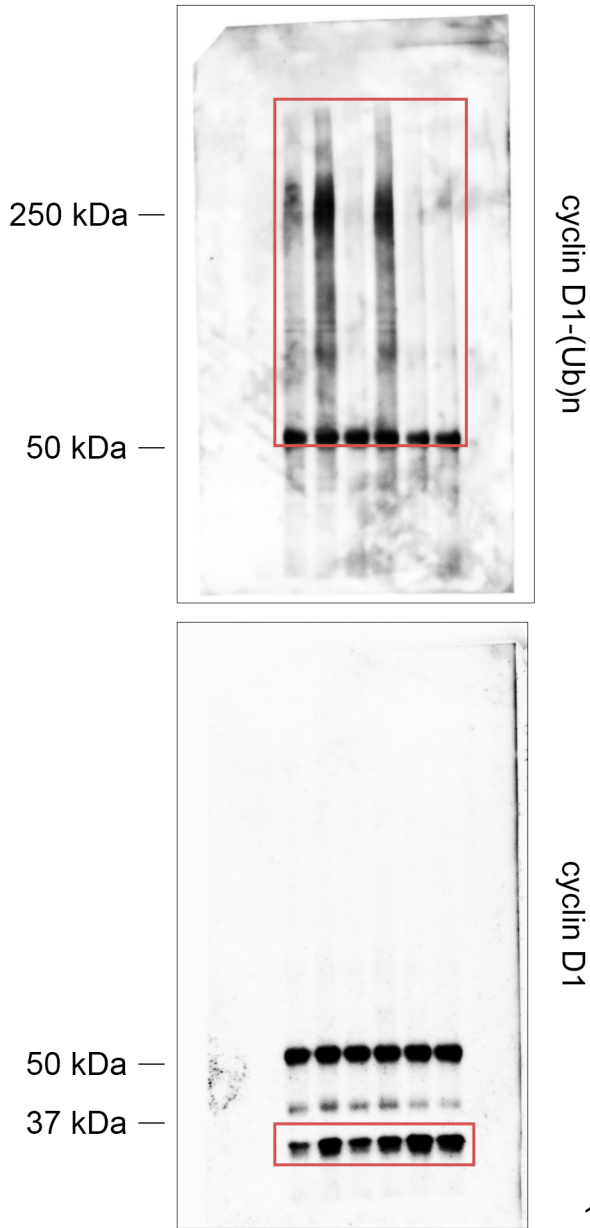

Extended Data Fig. 3f

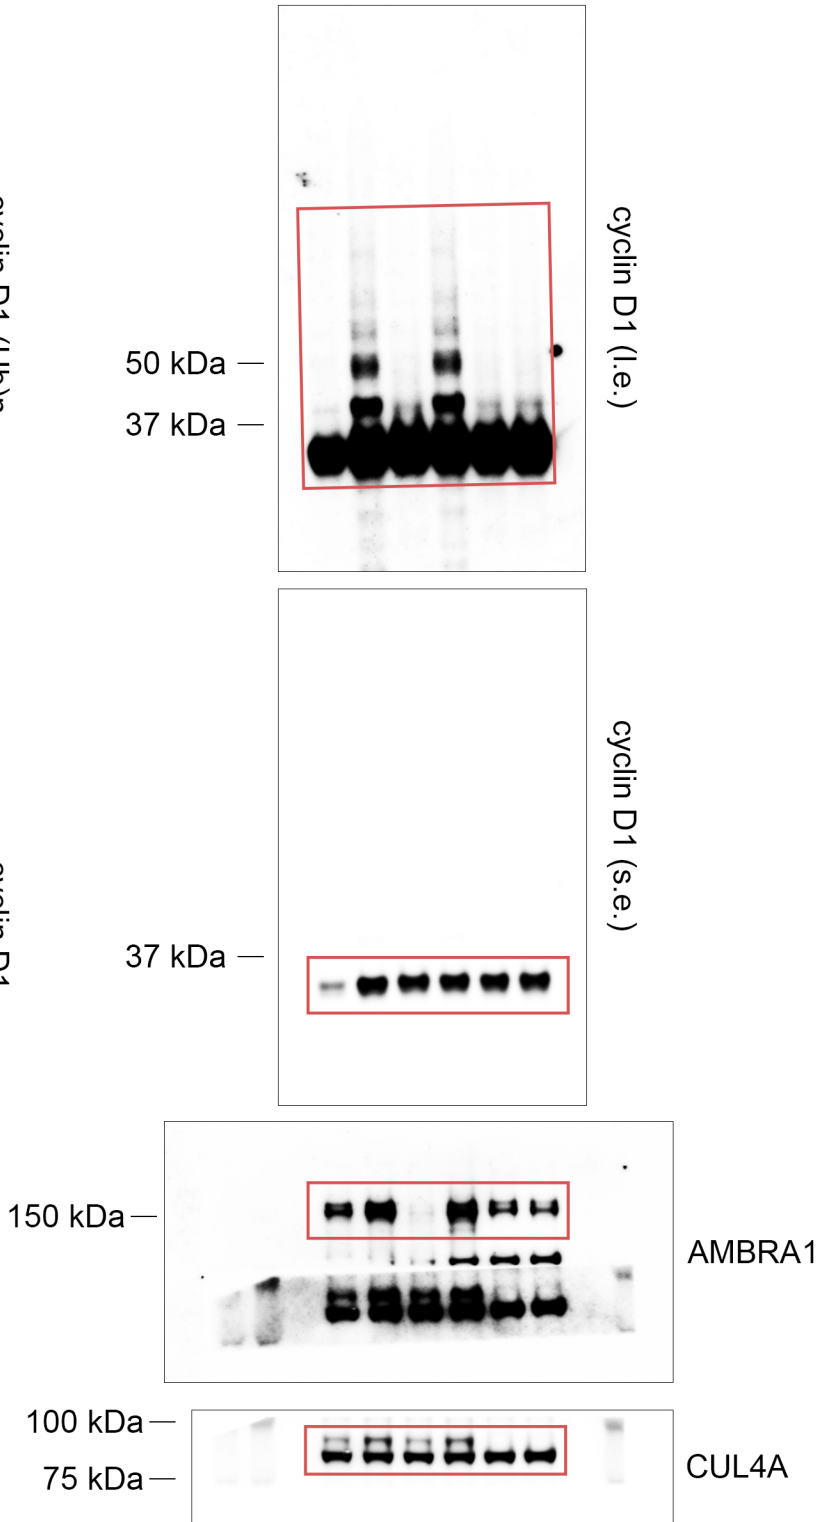

Figure 2f

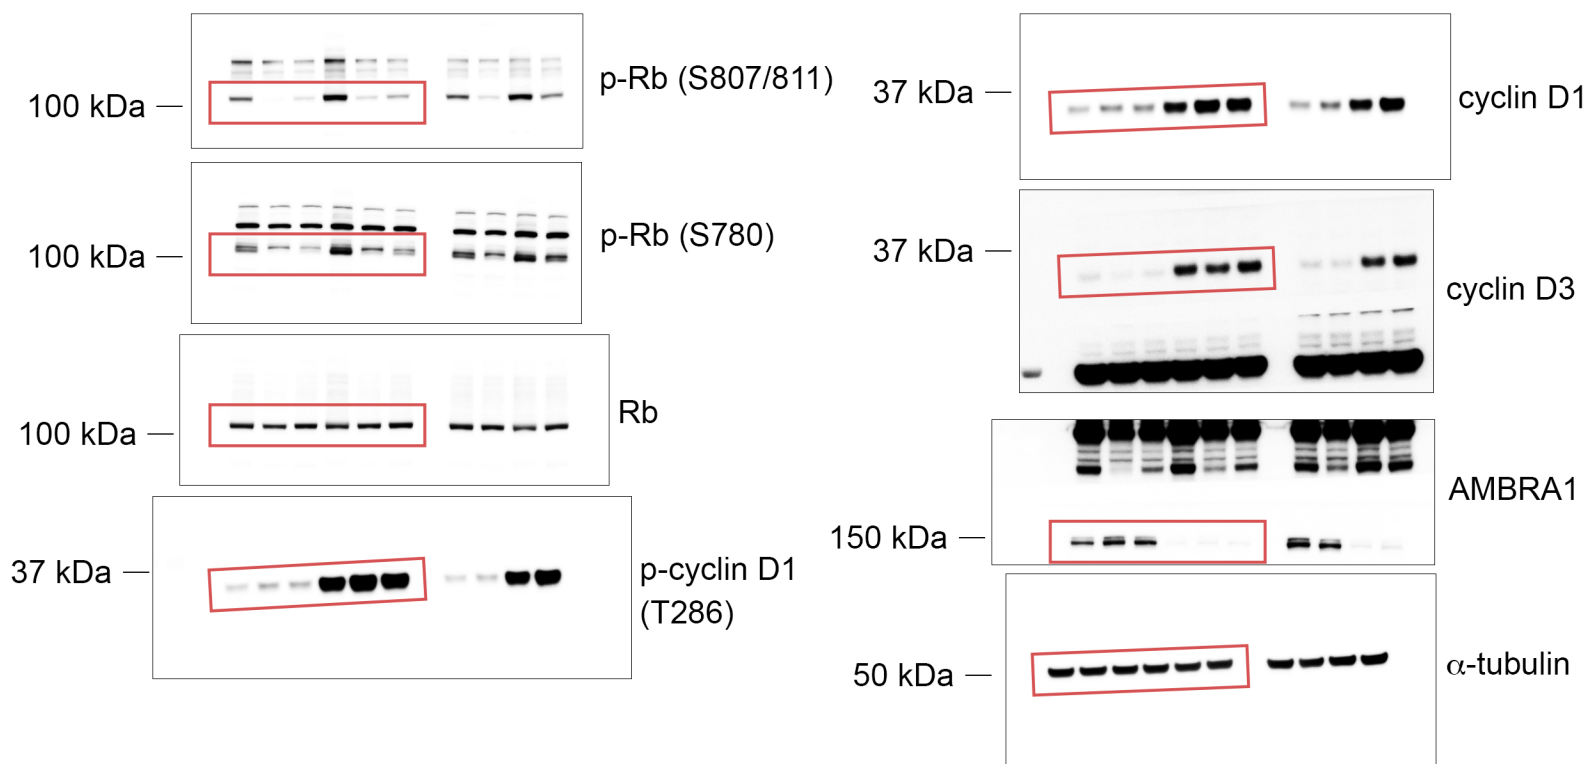

Figure 3a

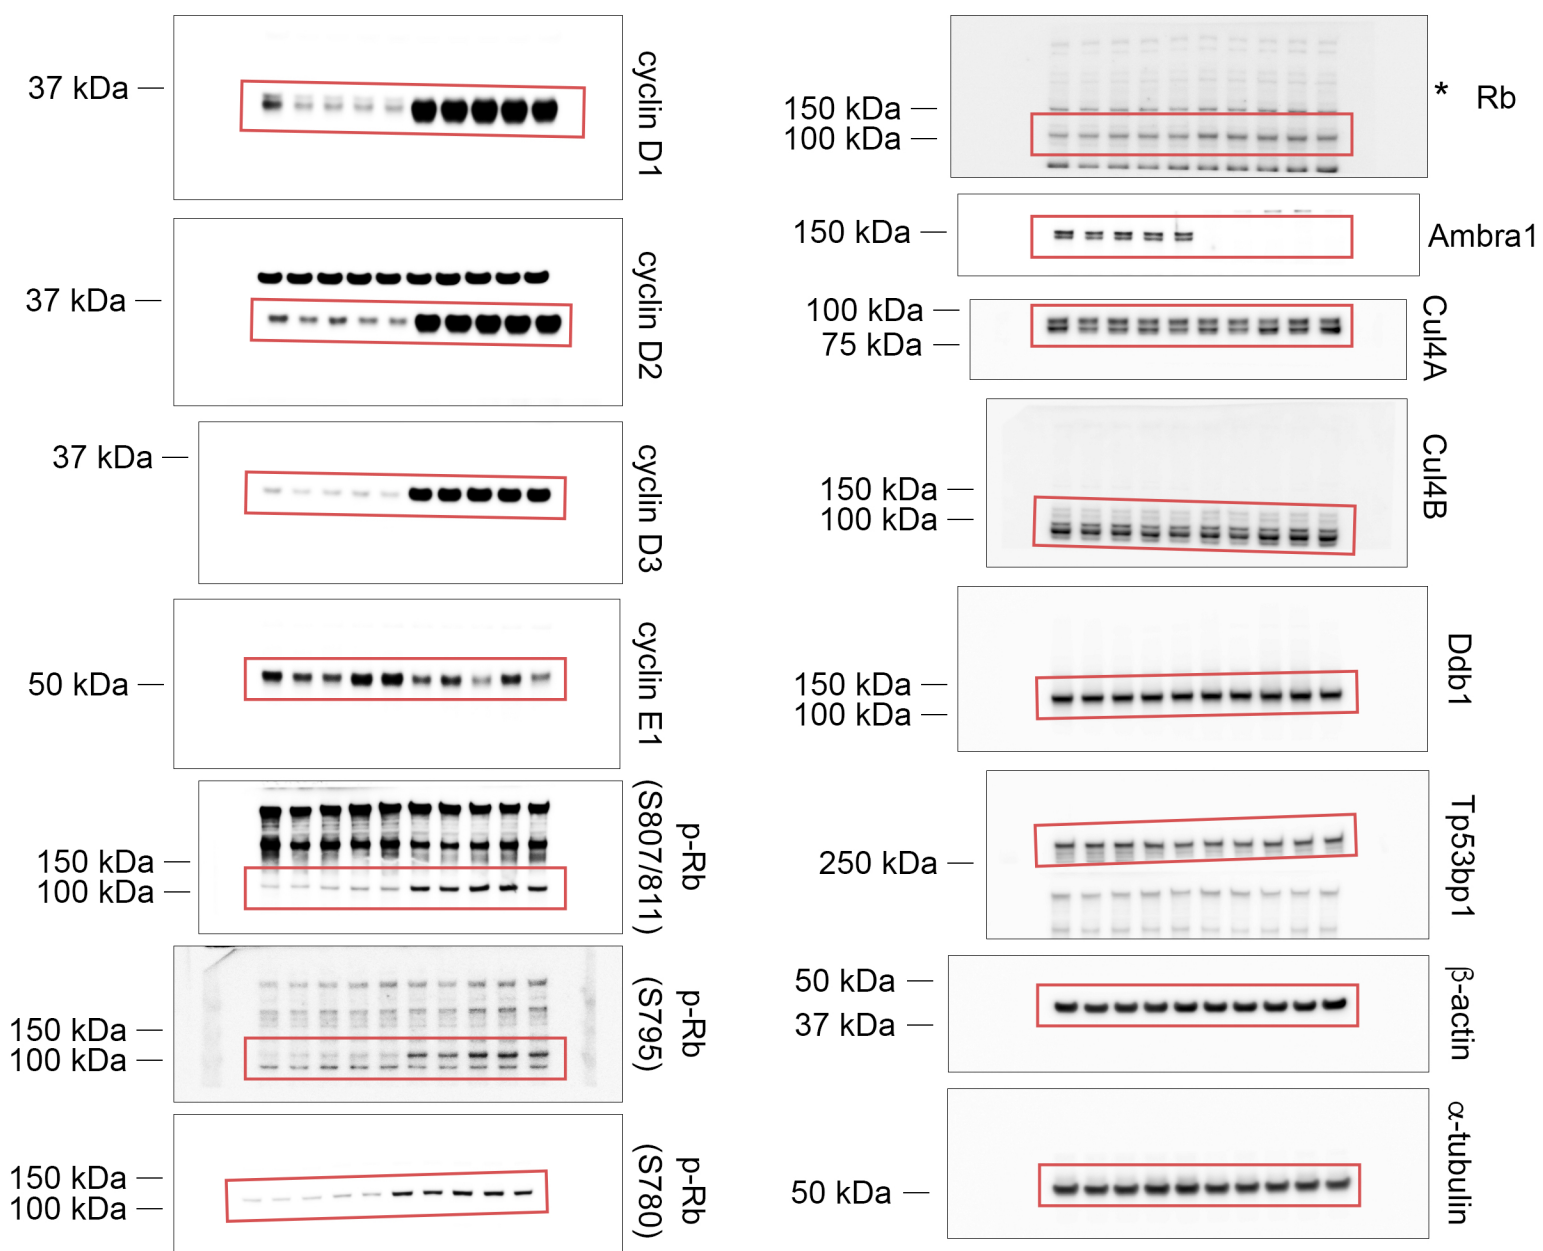

\* Indicates a row of dead pixels from the CCD camera of the chemiluminescent imager



**Figure 4a**

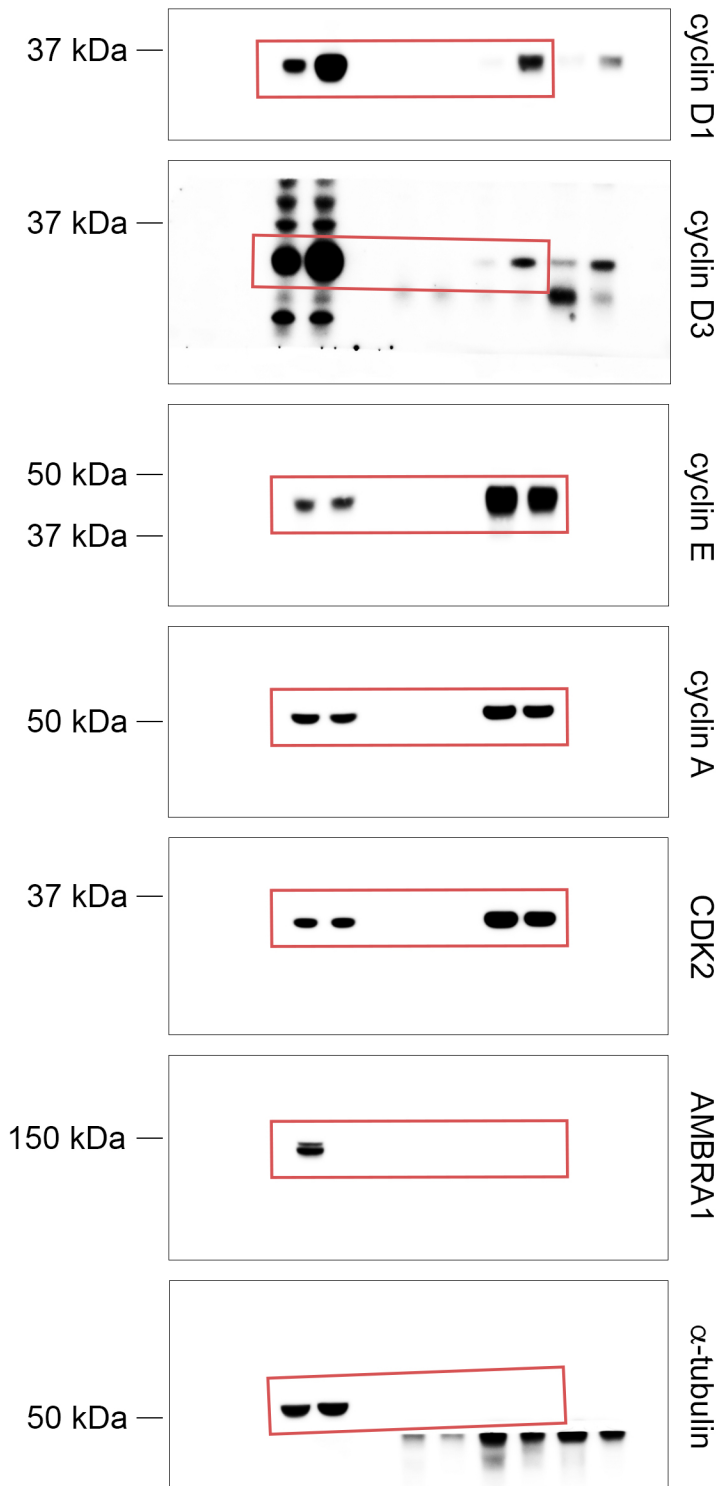

**Extended Data Figure 11j**

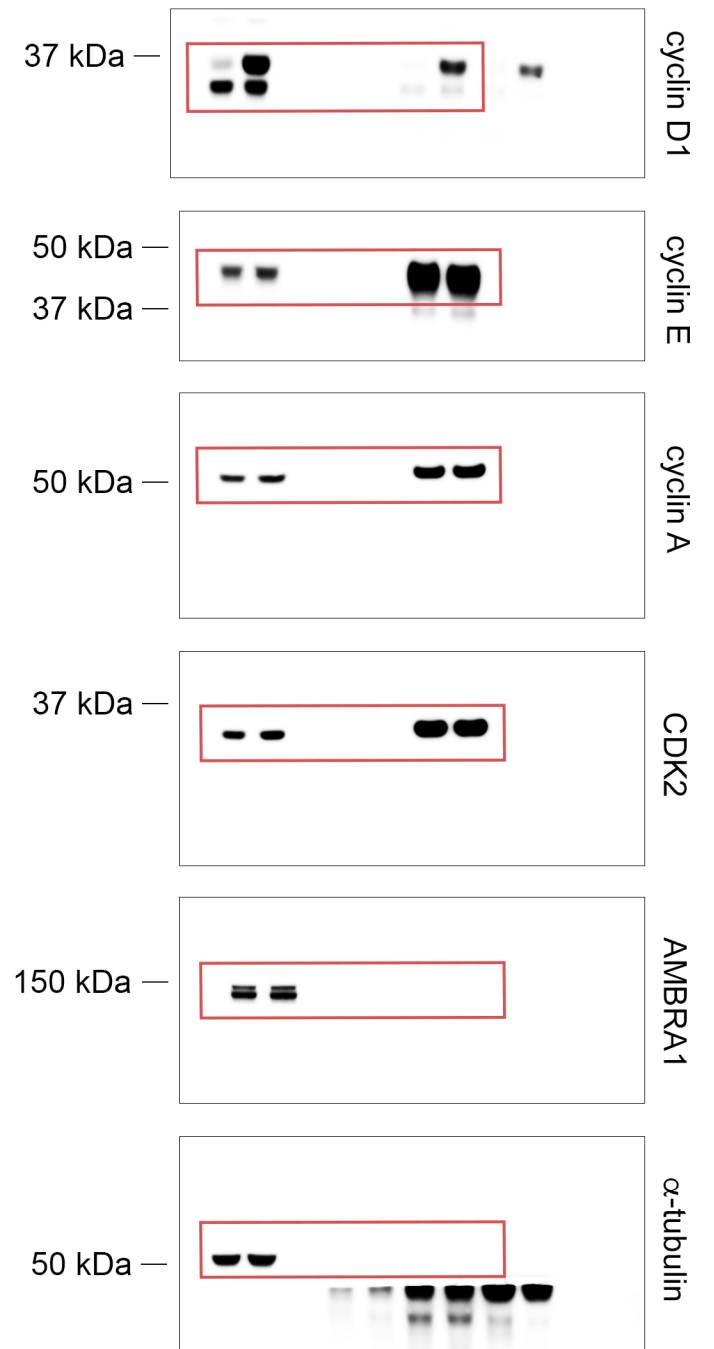

**Figure 4b and Extended Data Figure 12a**

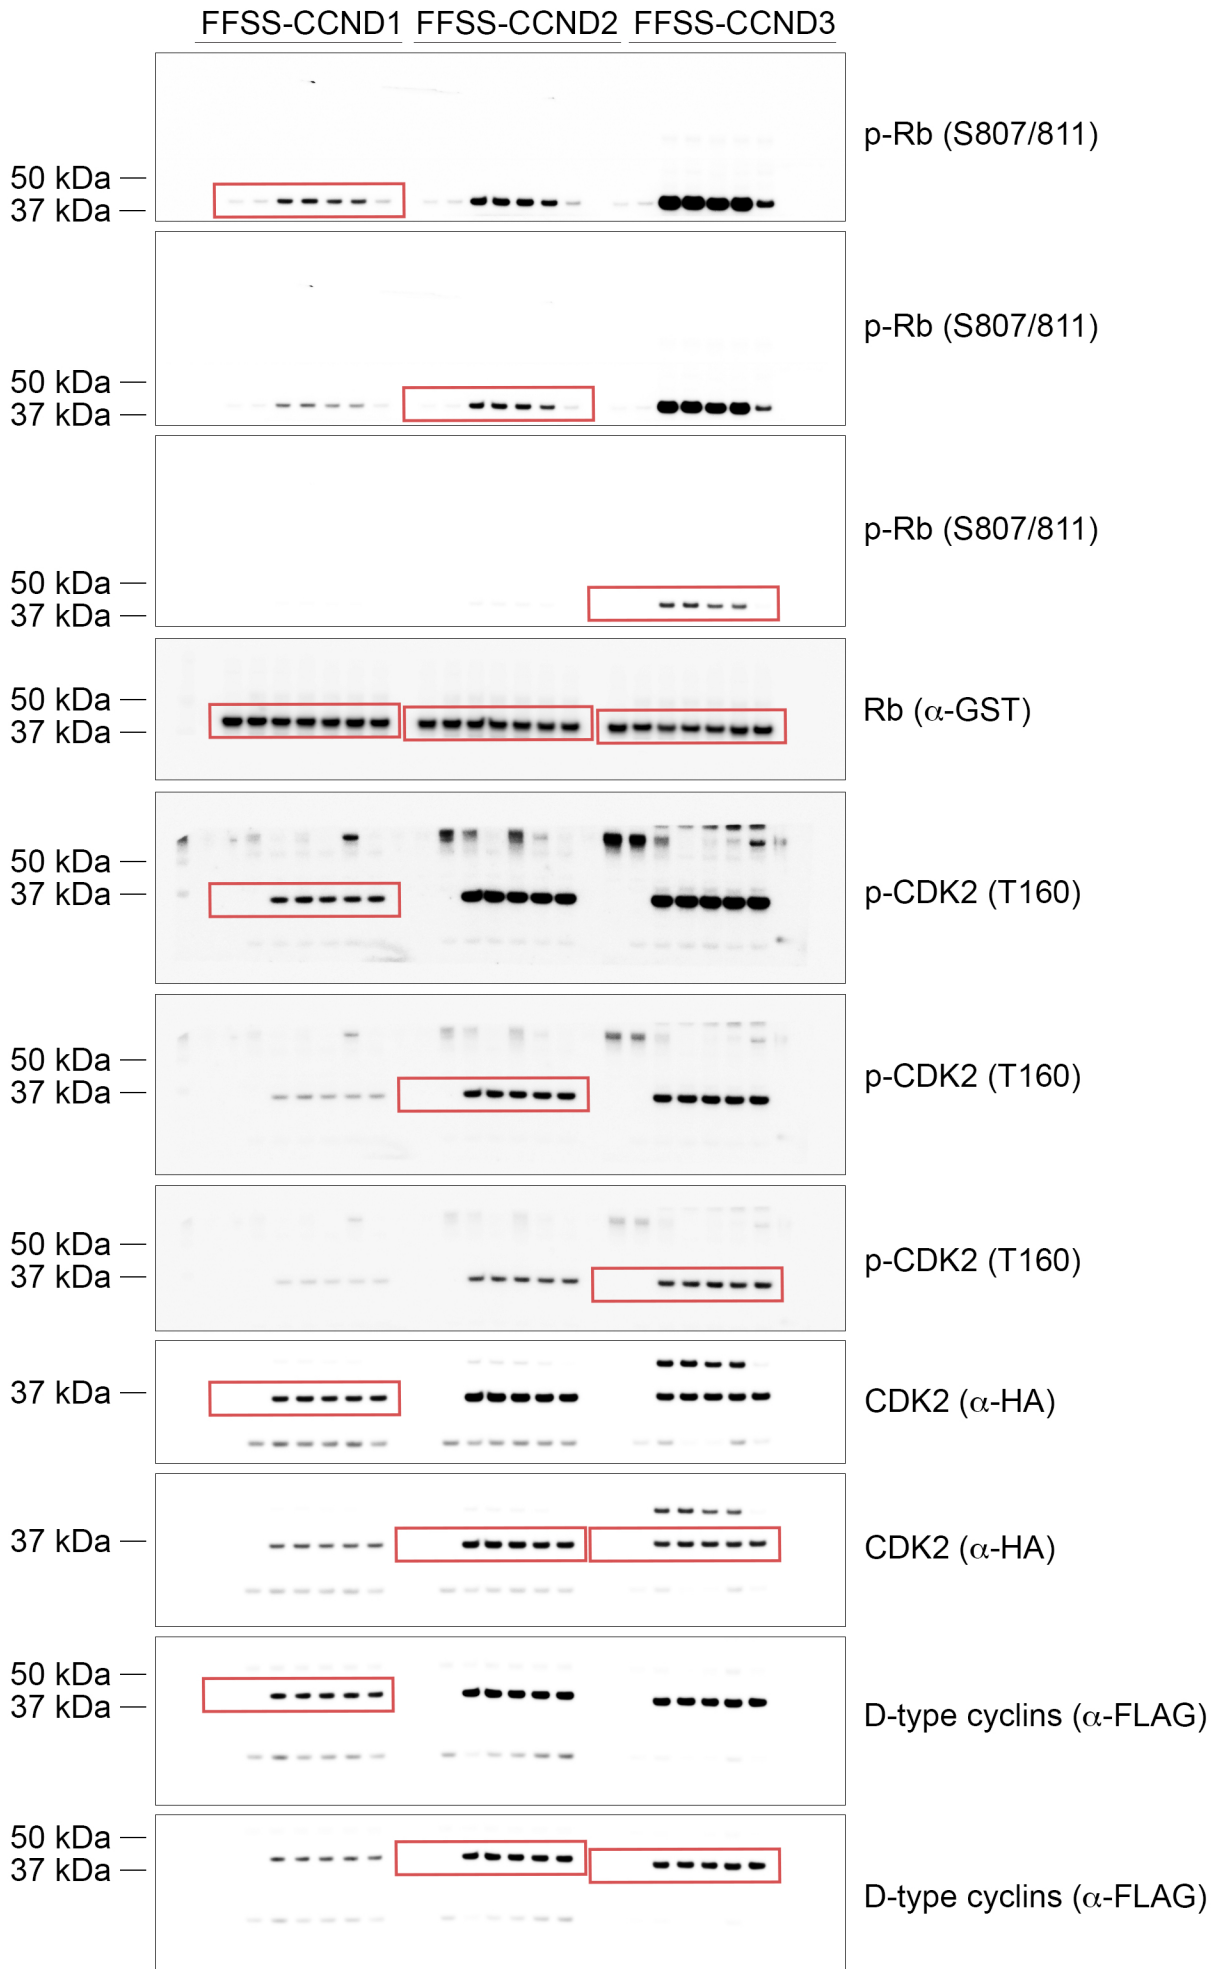

Extended Data Figure 1a

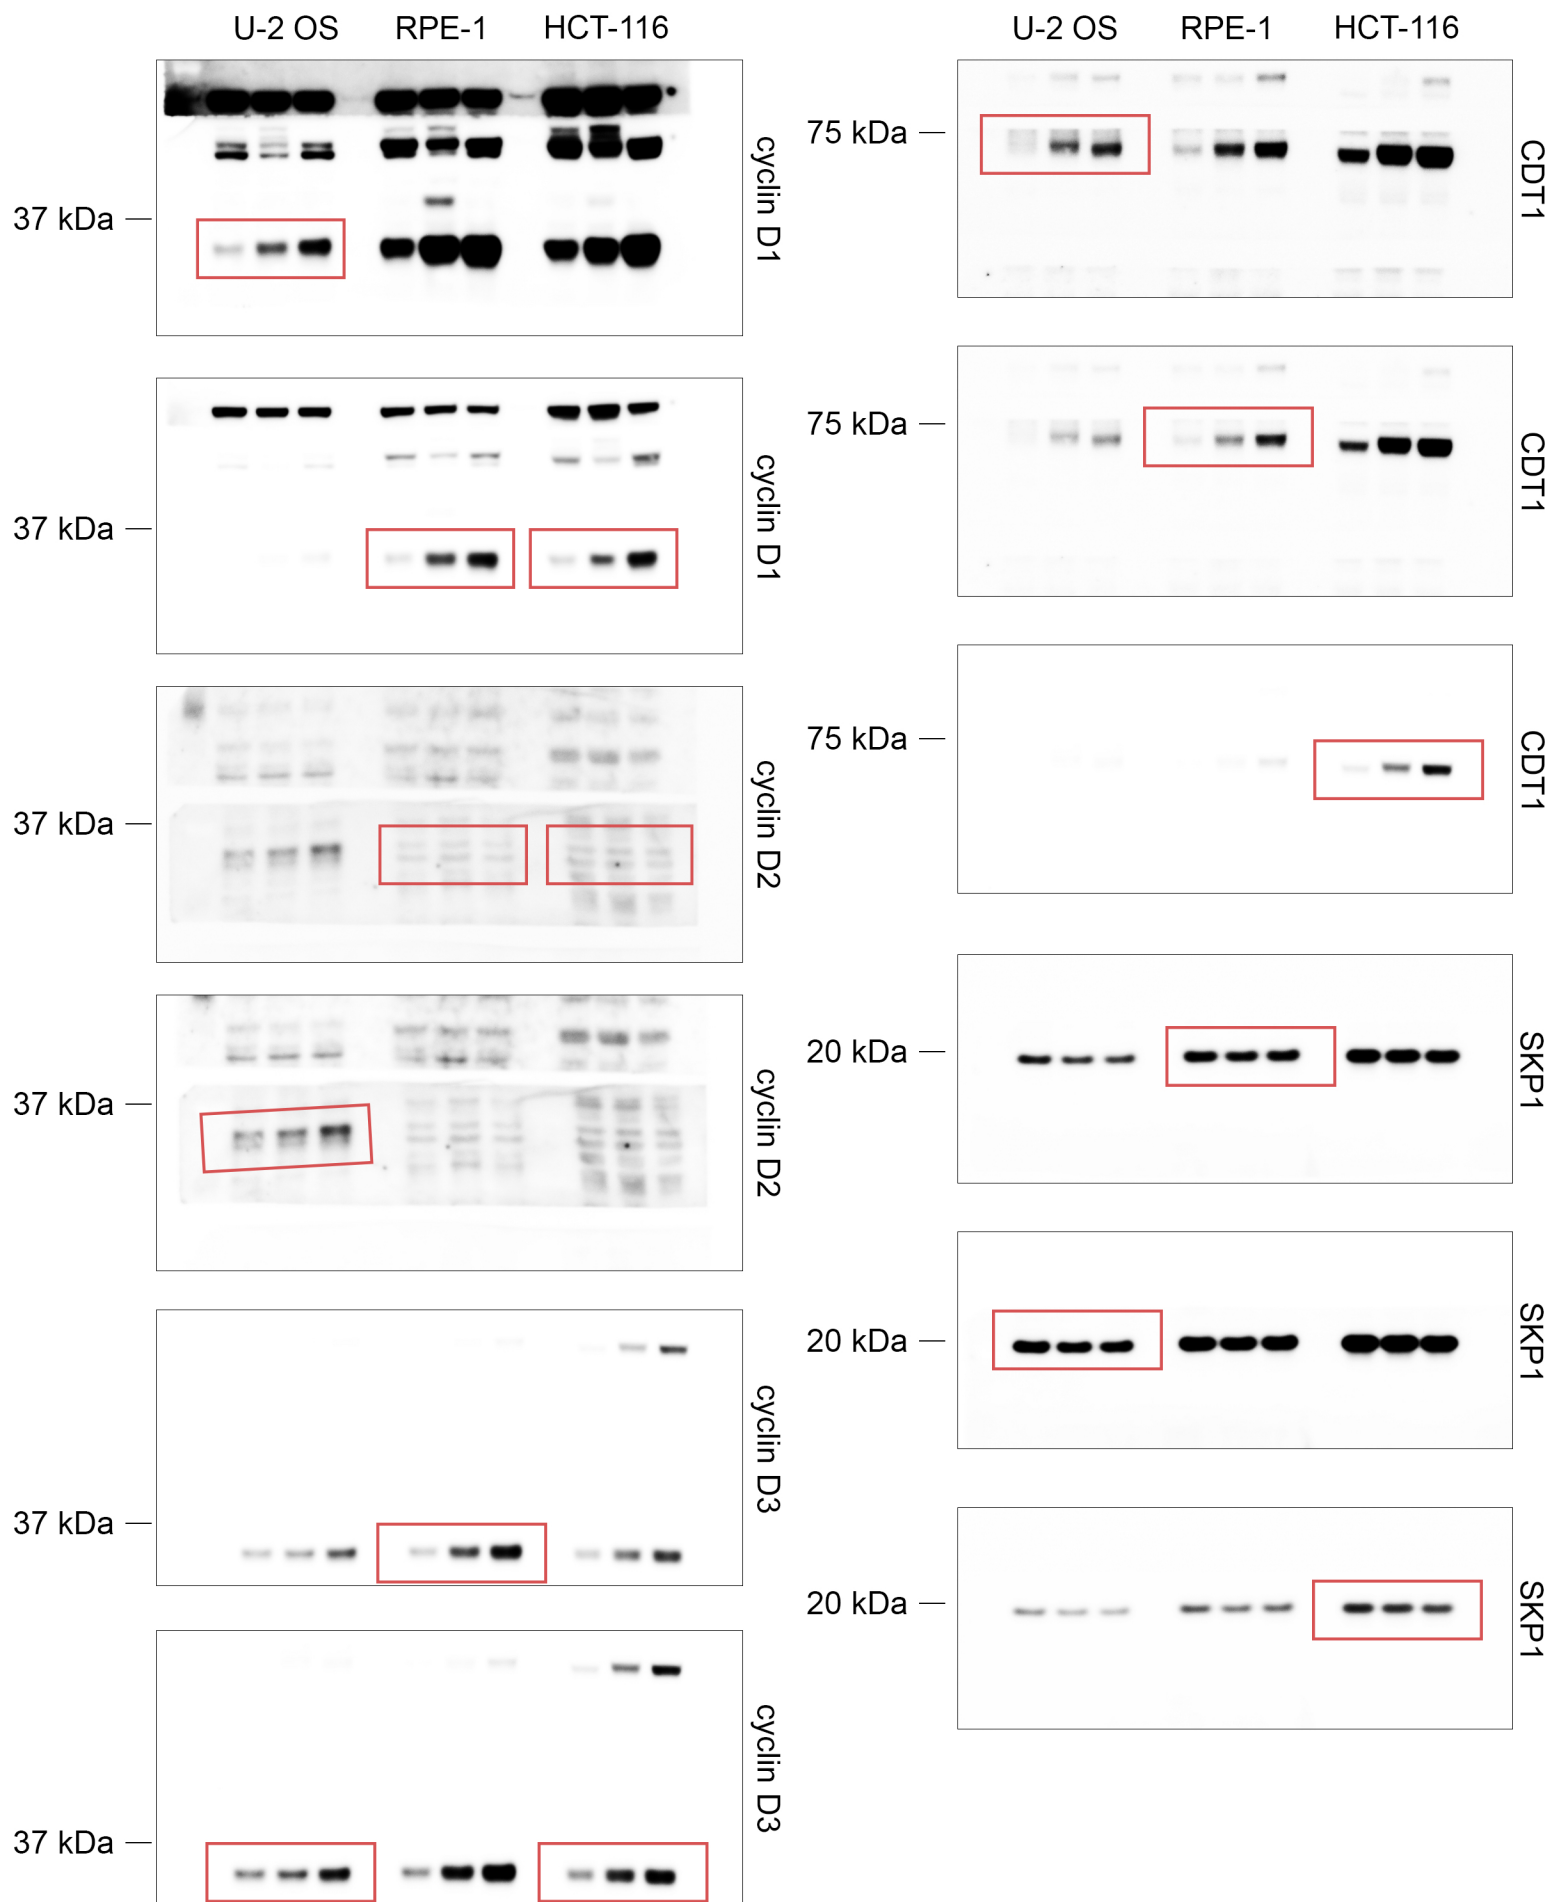

Extended Data Figure 1b

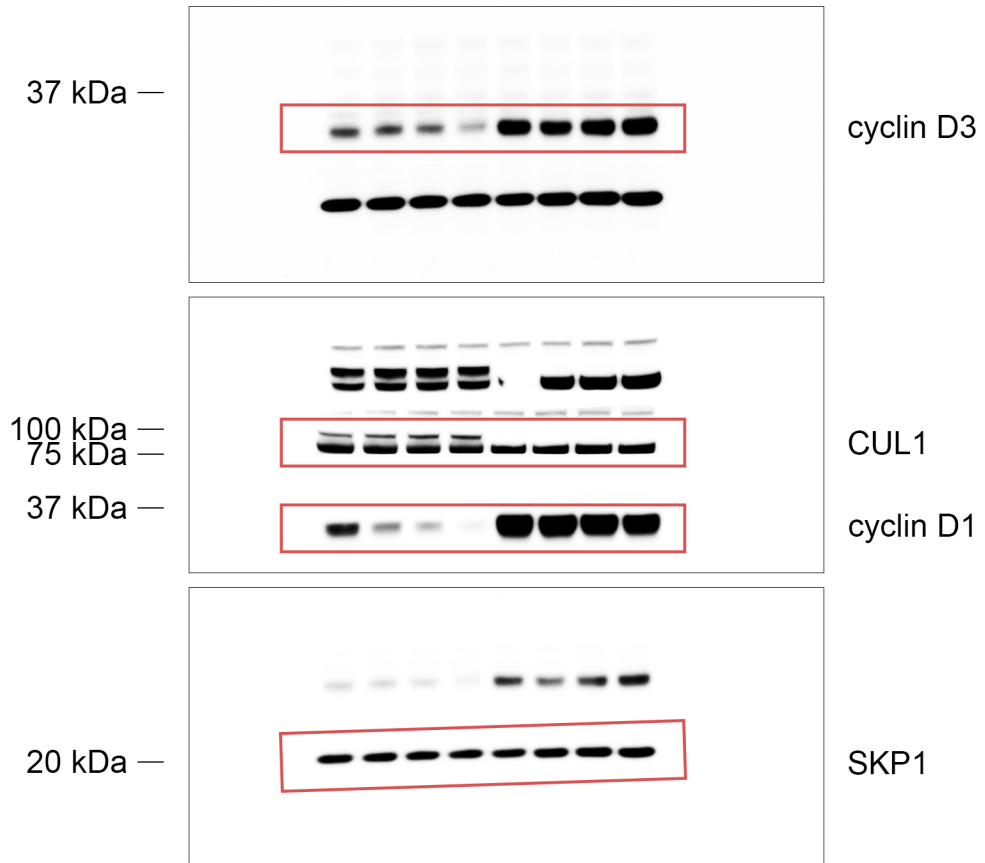

# Extended Data Figure 1c

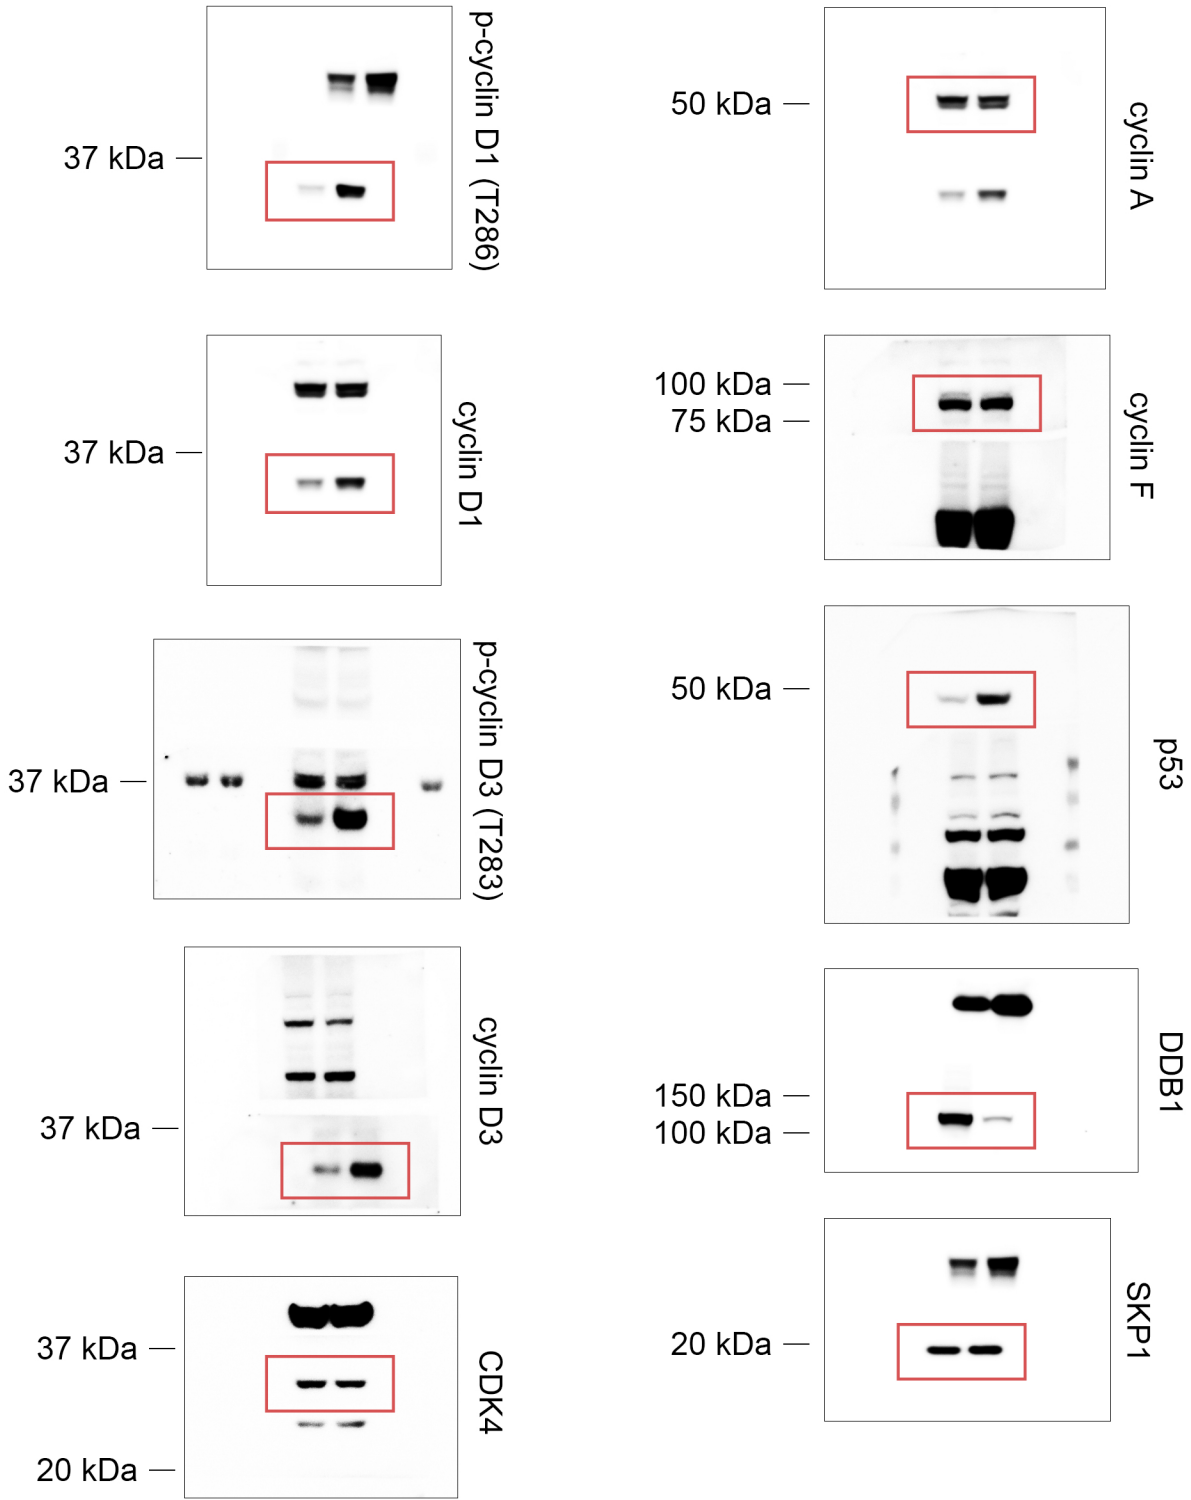

### Extended Data Figure 1d

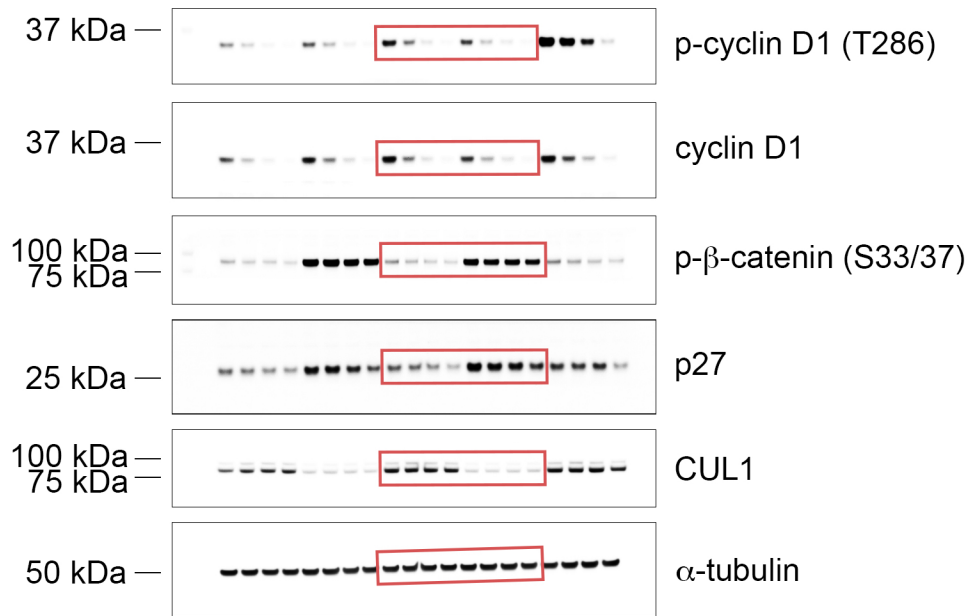

### Extended Data Figure 1e

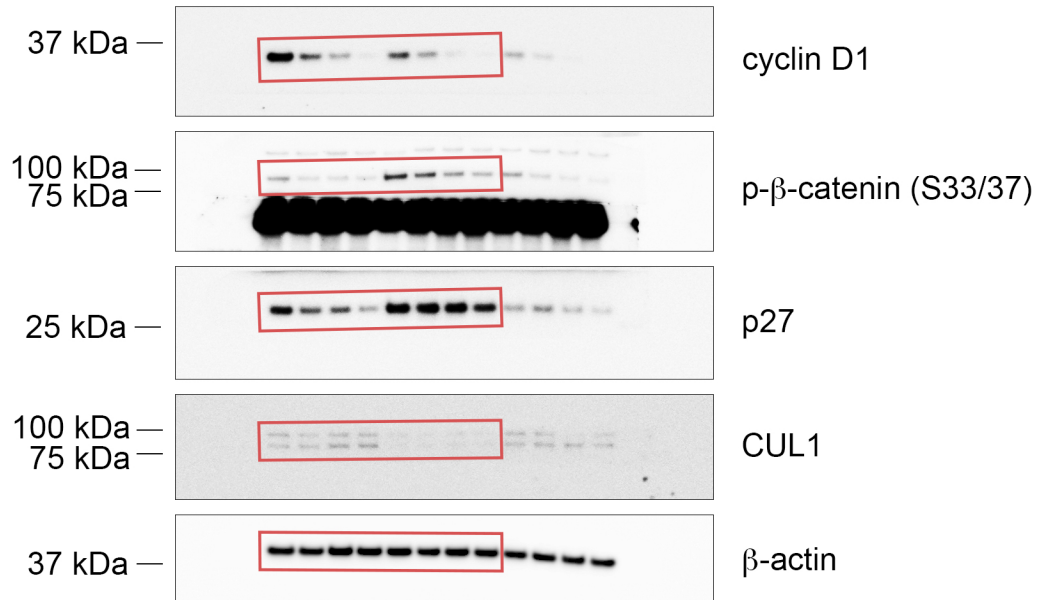

### Extended Data Figure 1f

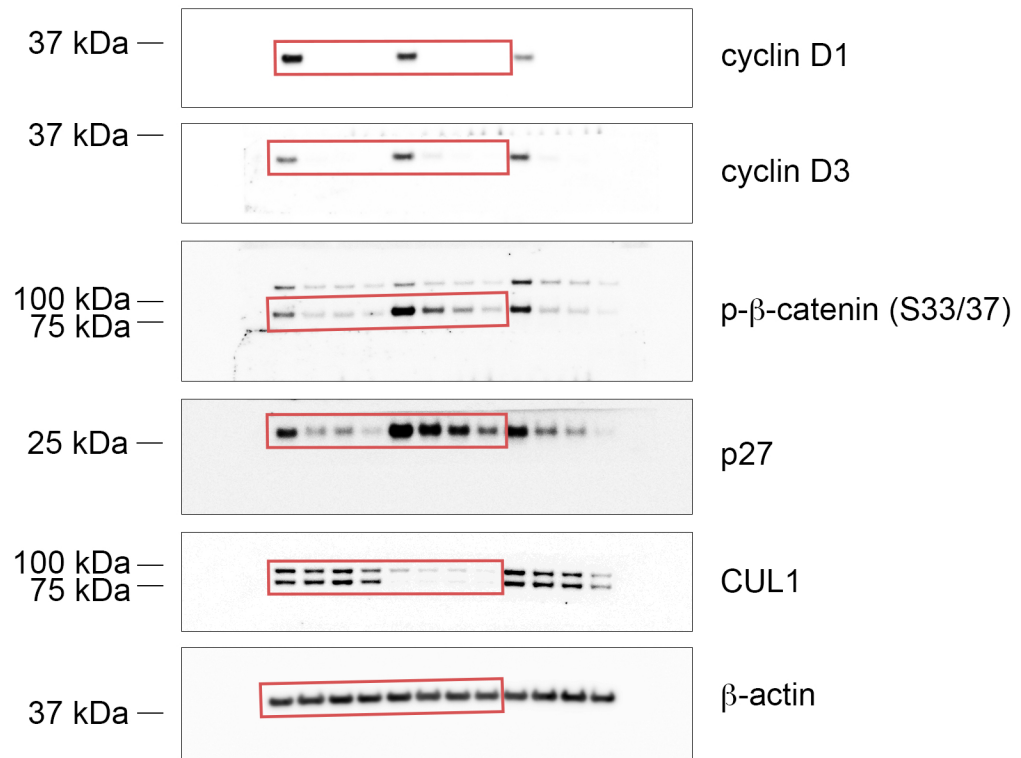

### Extended Data Figure 1g

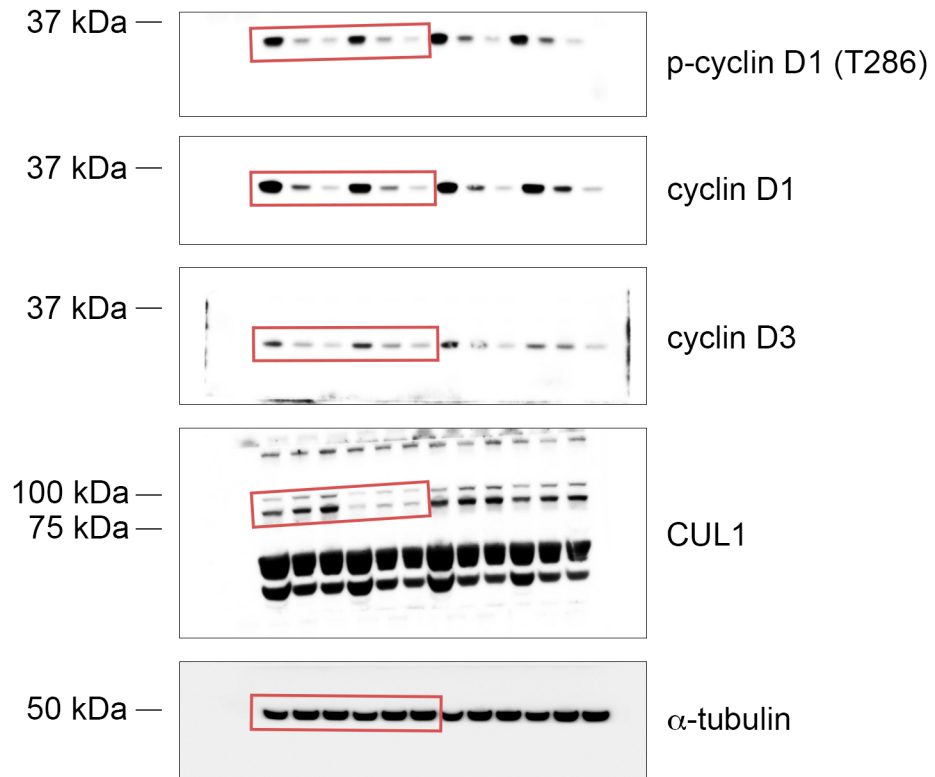

## Extended Data Figure 1h

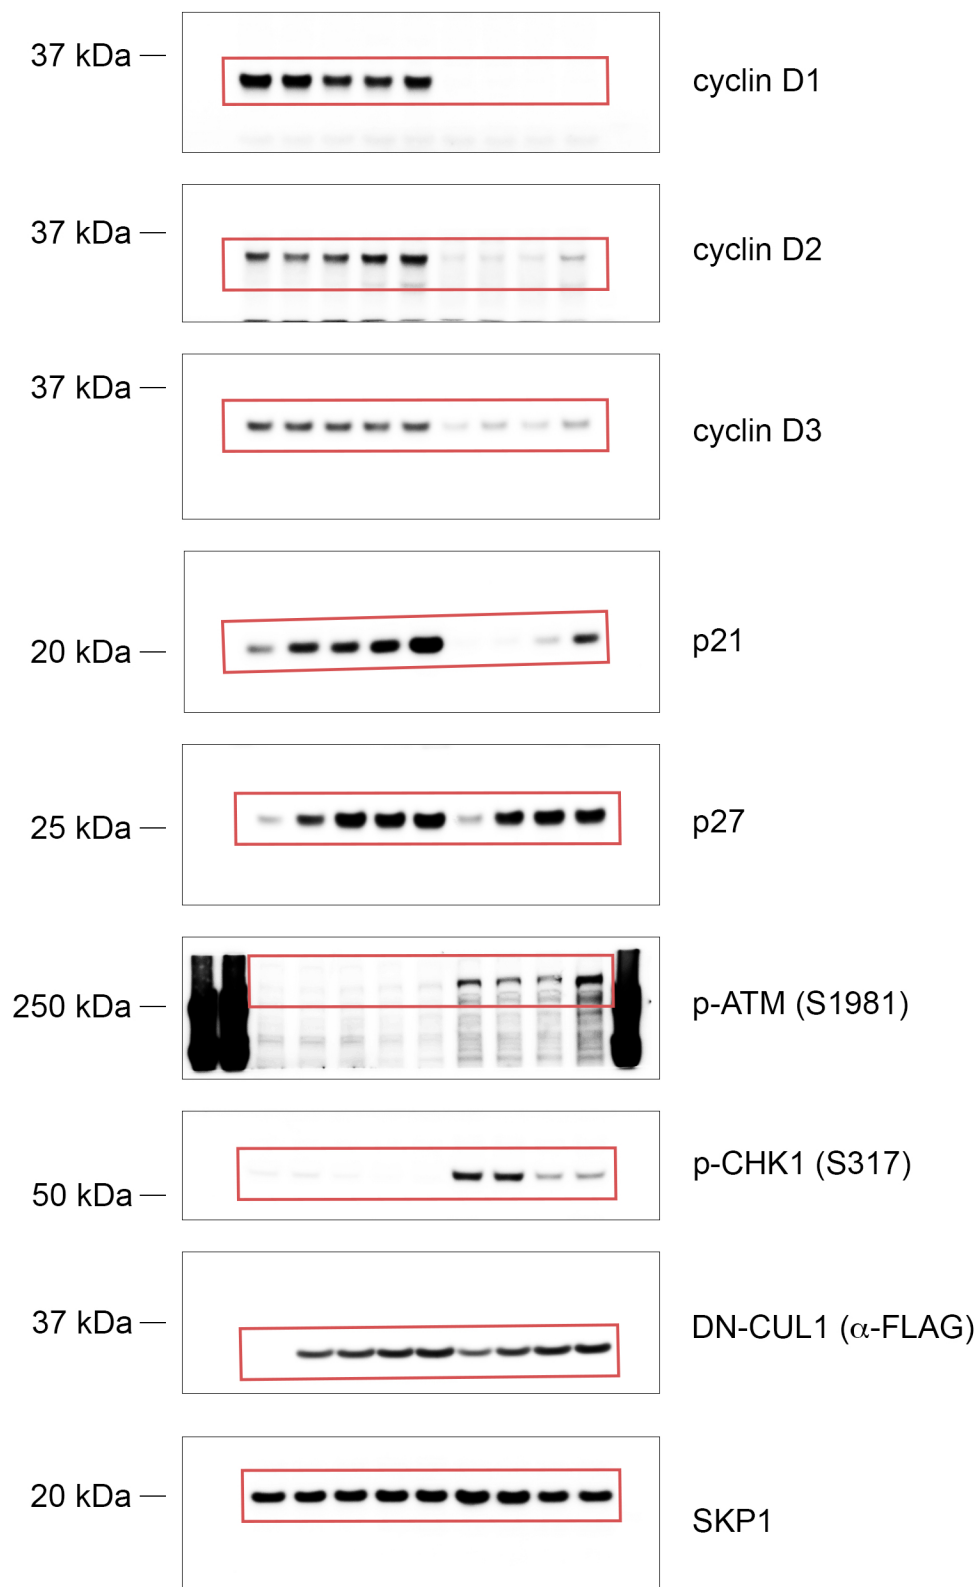



**Extended Data Figure 2a**

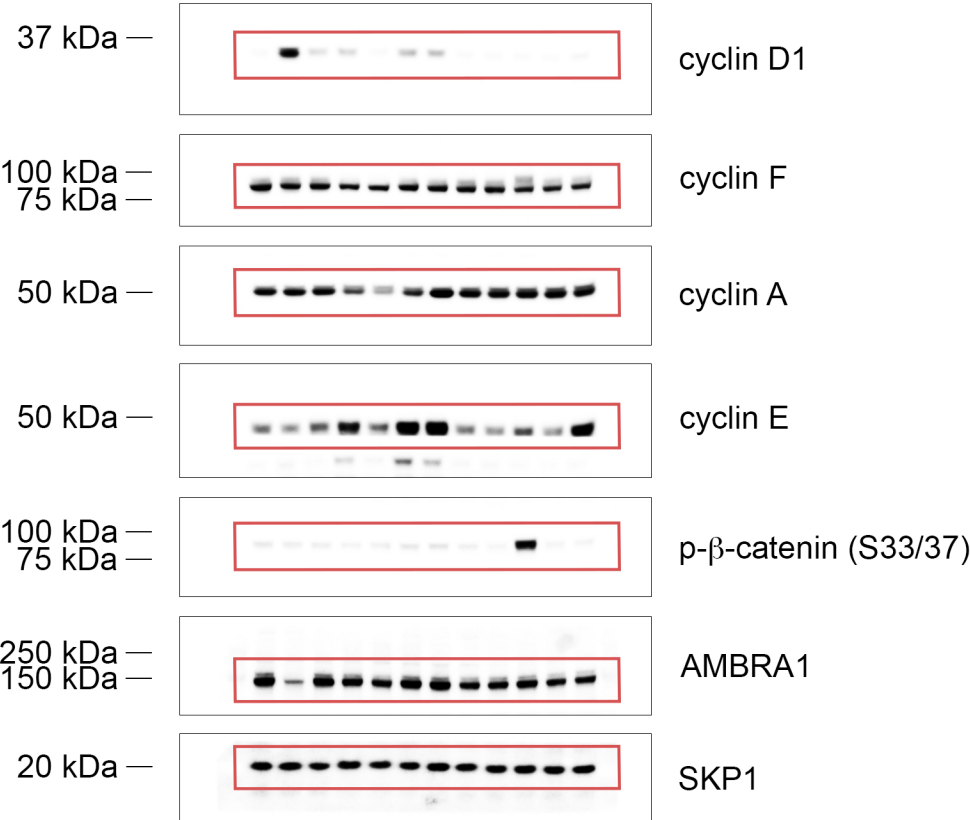

**Extended Data Figure 2b**

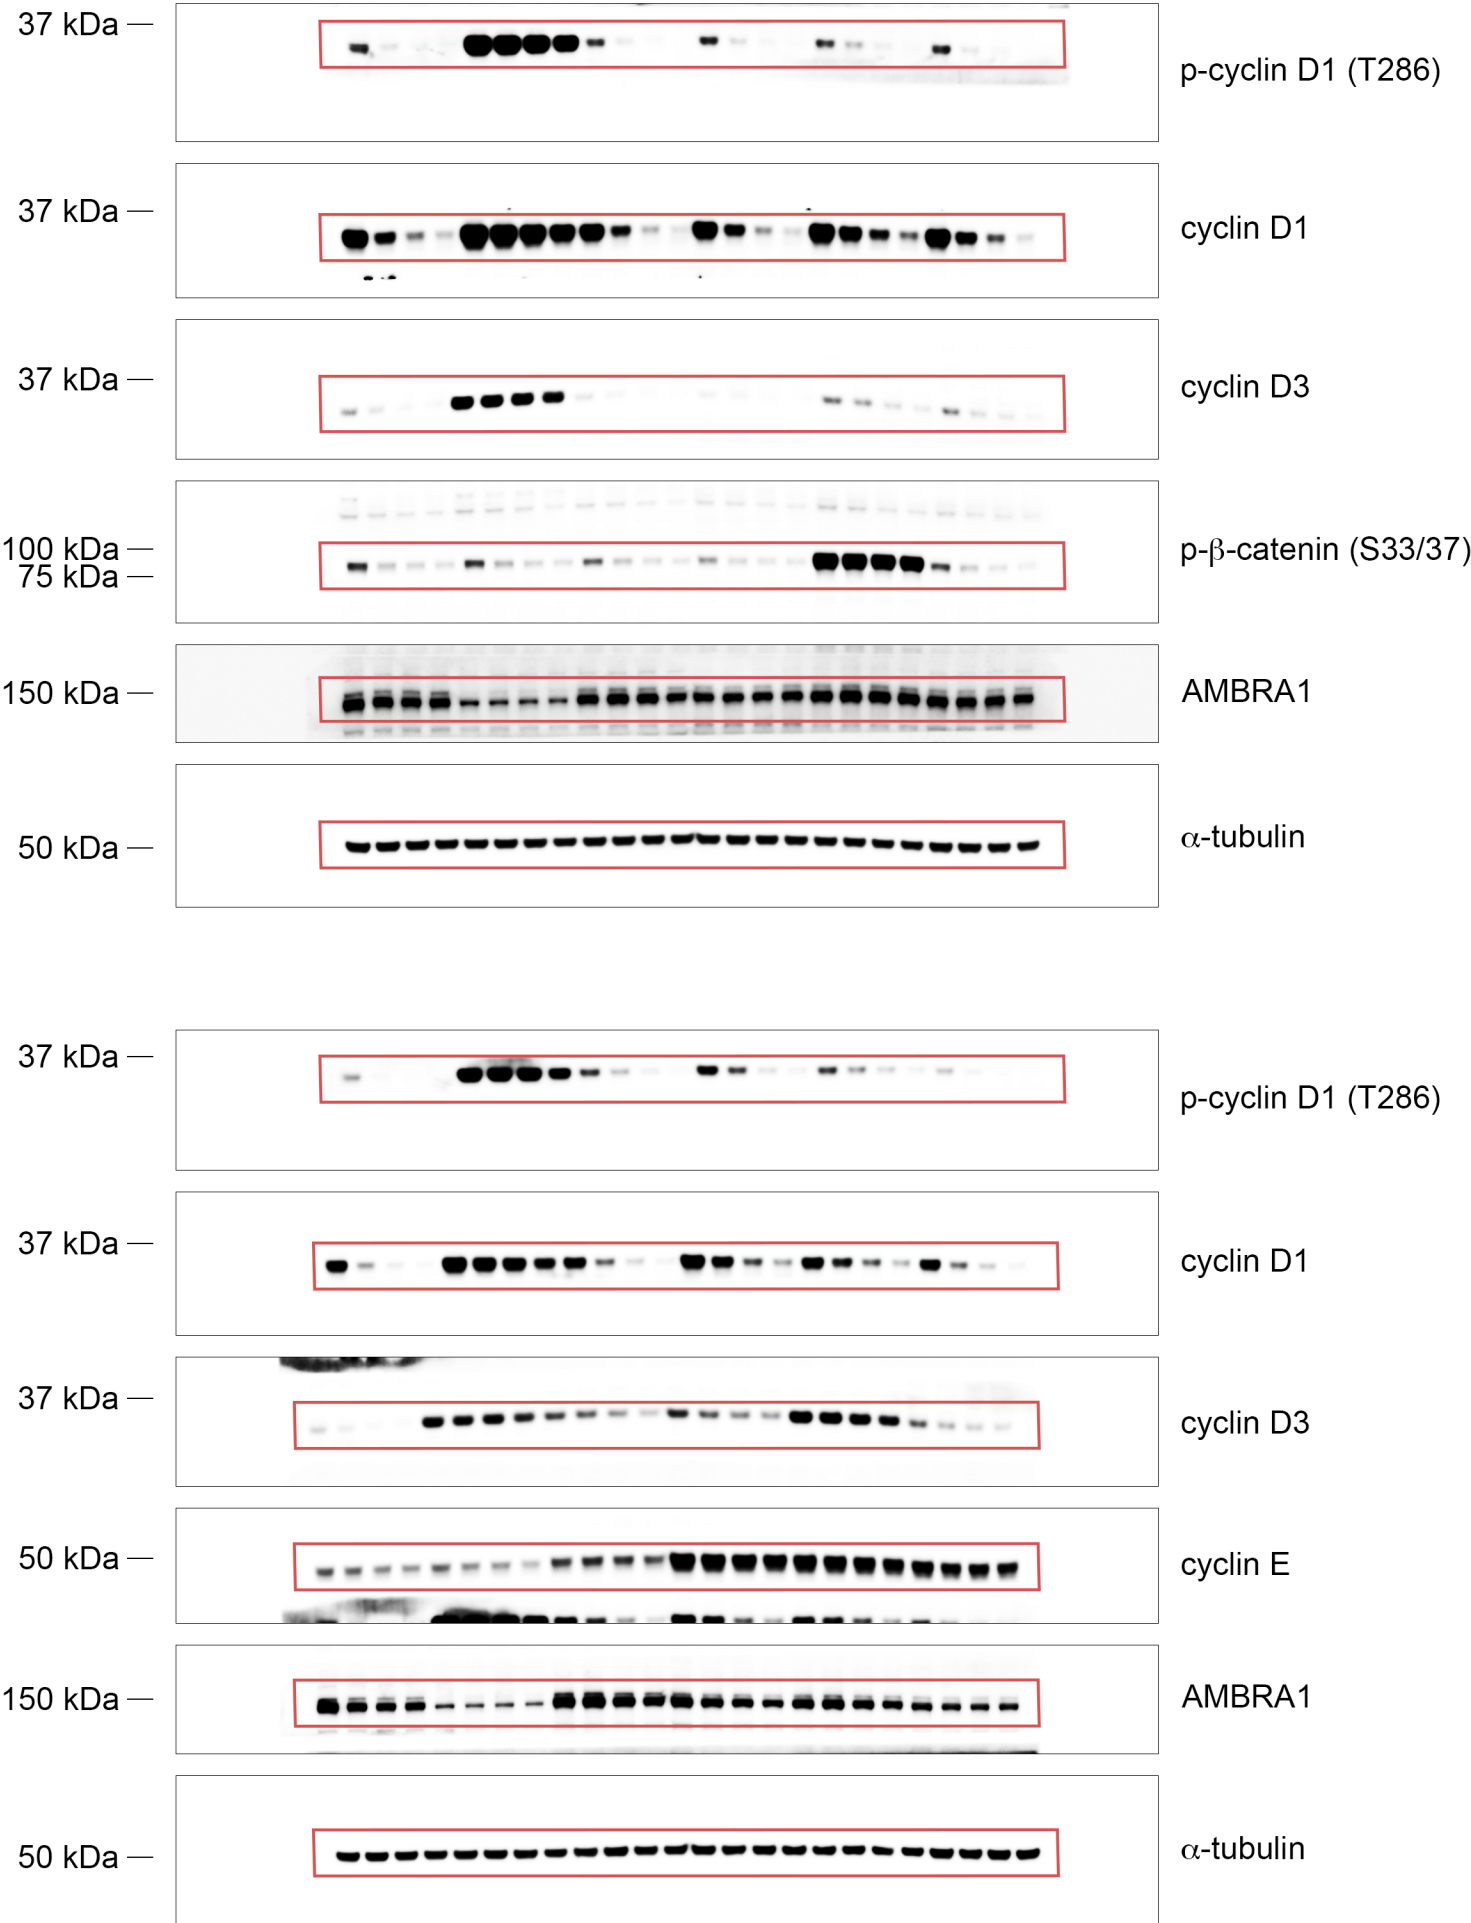

**Extended Data Figure 2c**

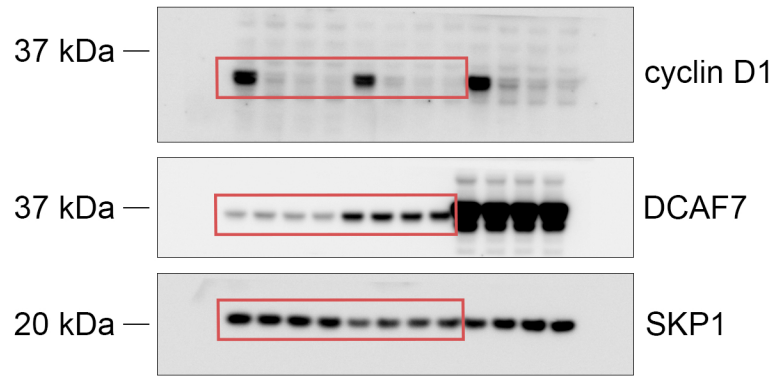

**Extended Data Figure 2d**

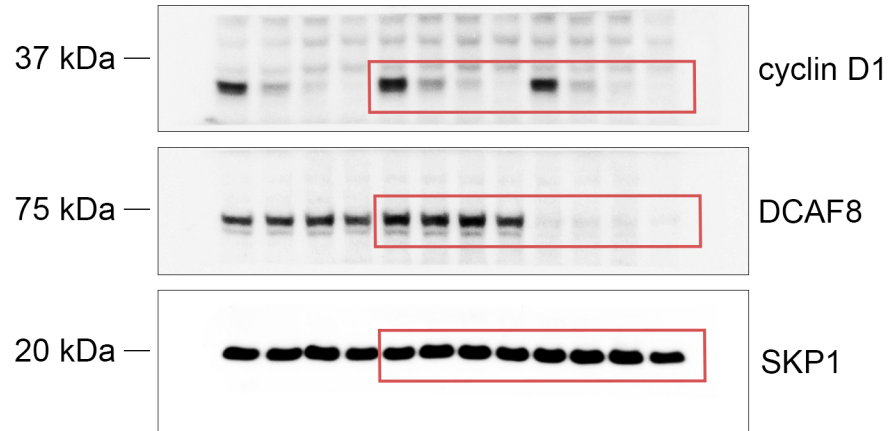

**Extended Data Figure 2e**

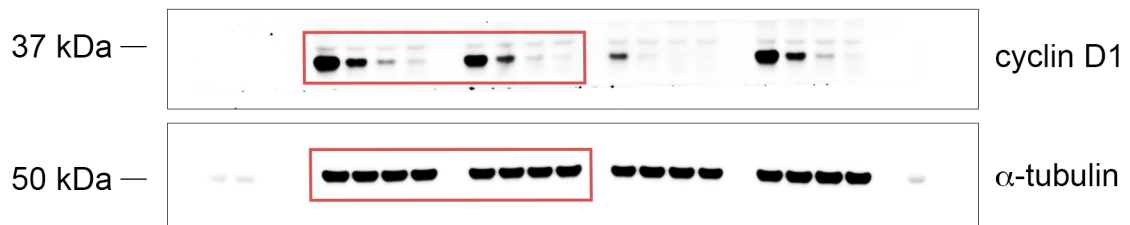

**Extended Data Figure 2f**

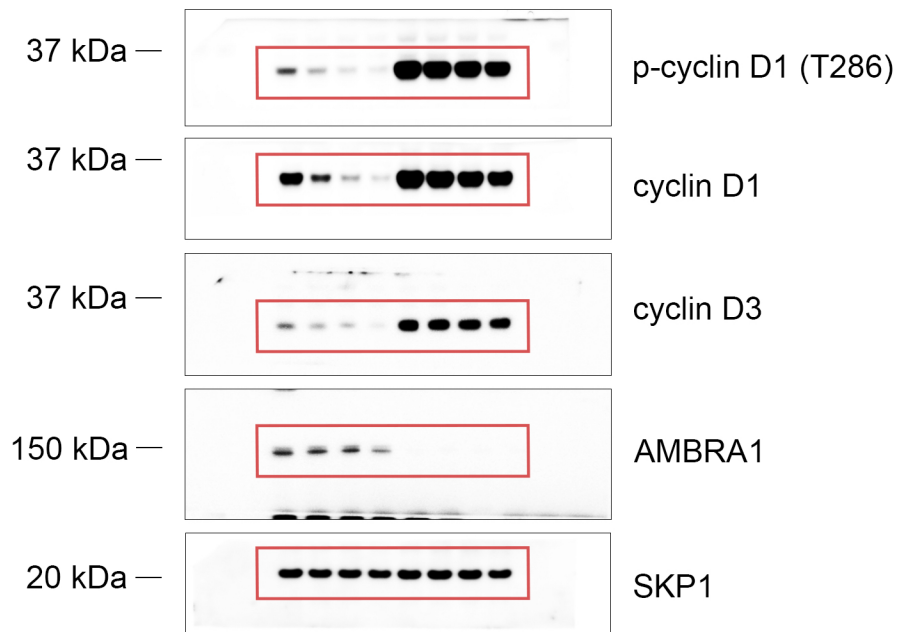

**Extended Data Figure 2g**

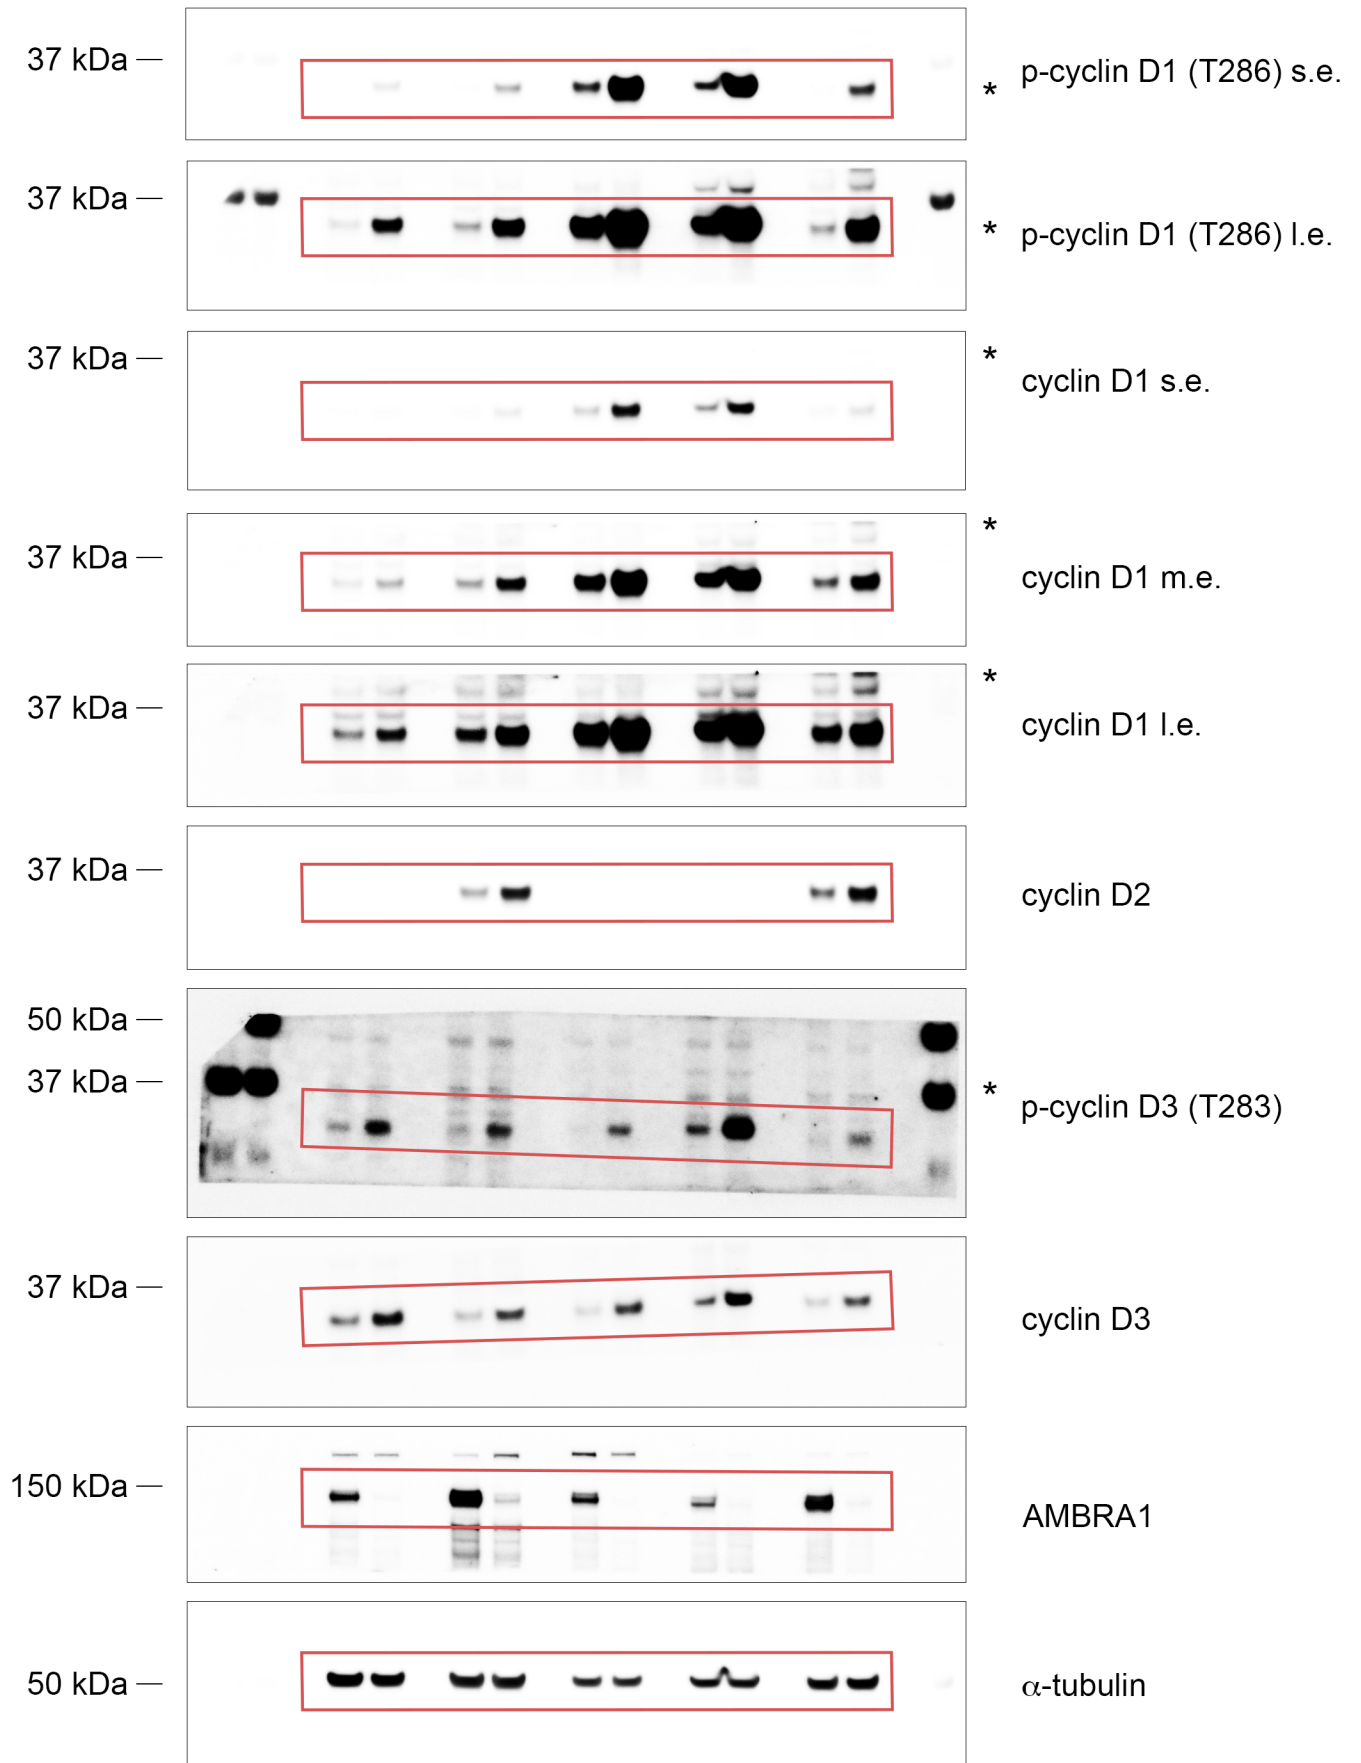

\* Indicates a row of dead pixels from the CCD camera of the chemiluminescent imager

## Extended Data Figure 2i

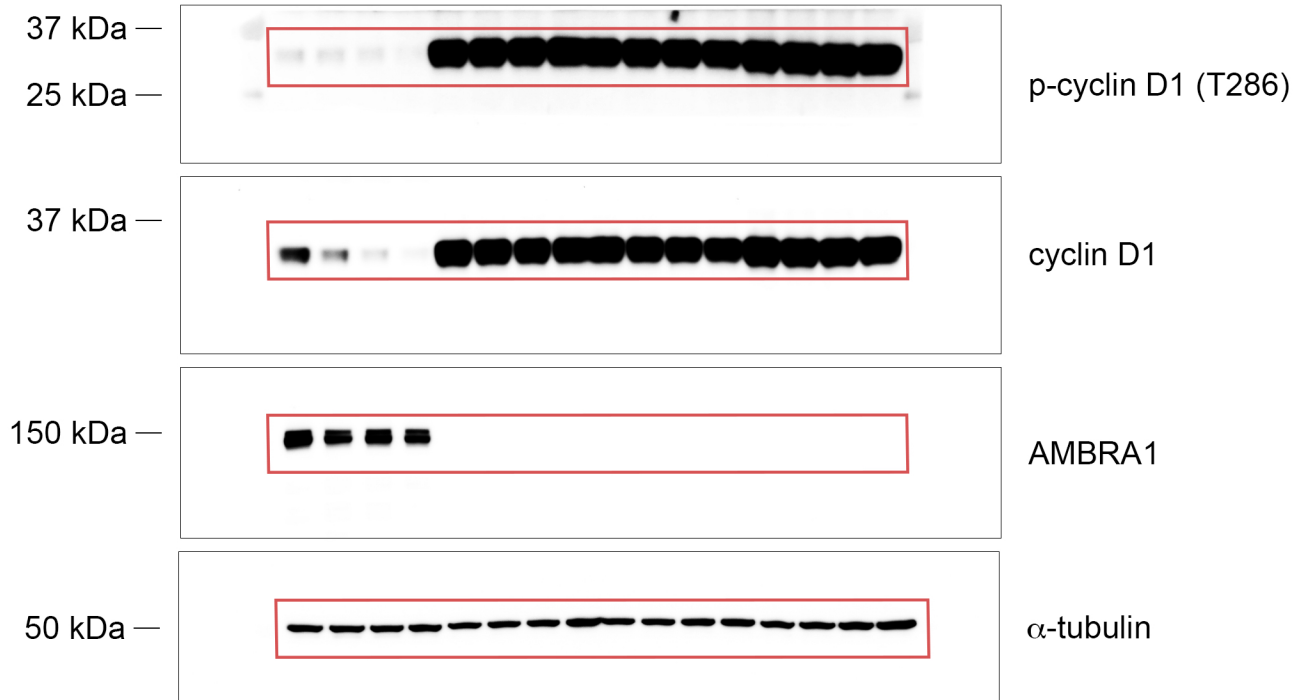

# Extended Data Figure 2j

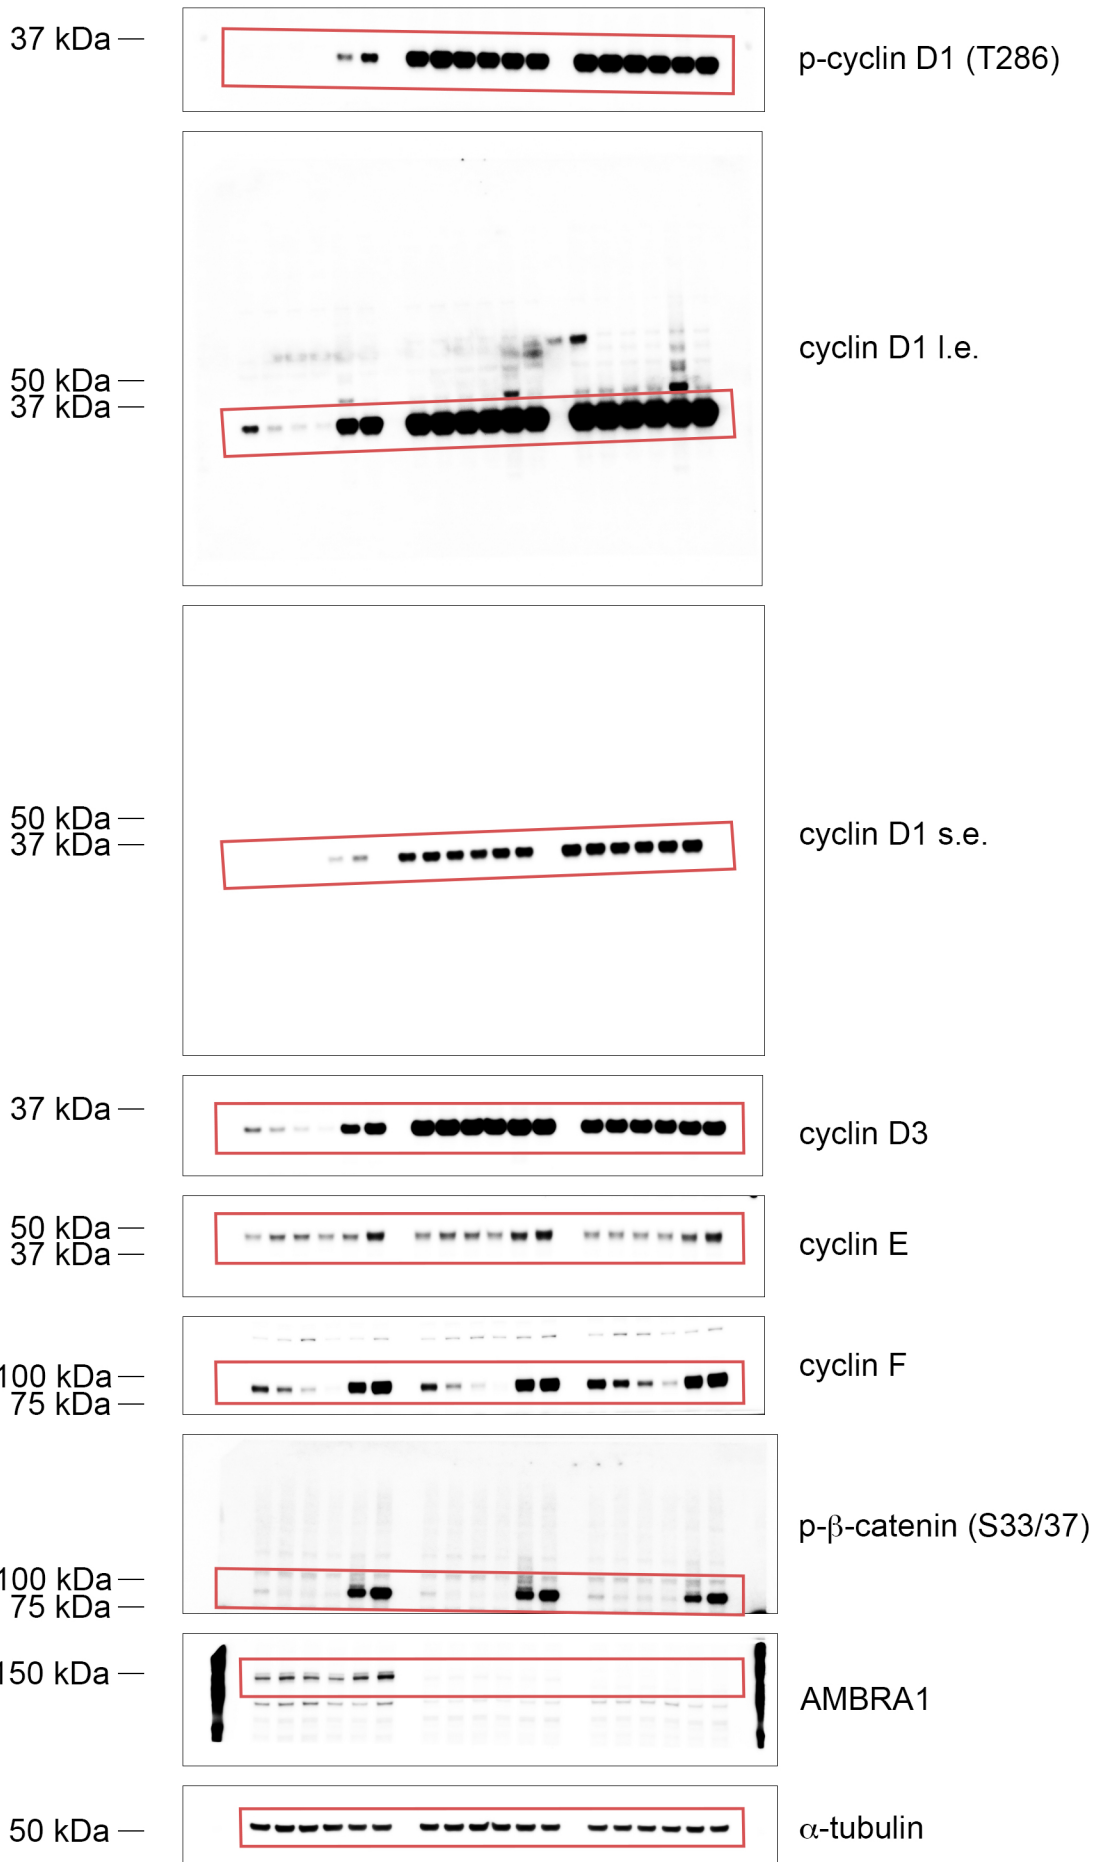

### Extended Data Figure 2k

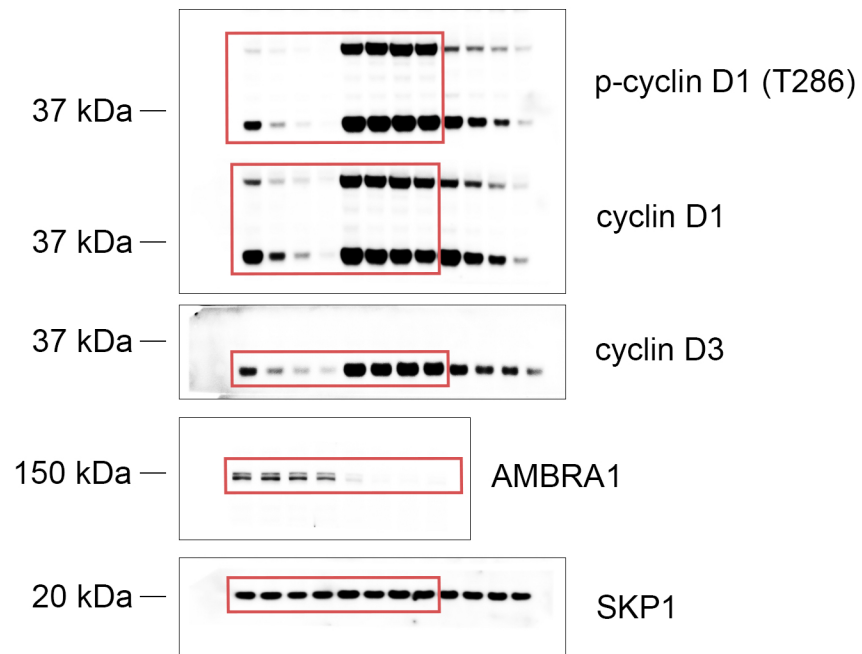

### Extended Data Figure 2l

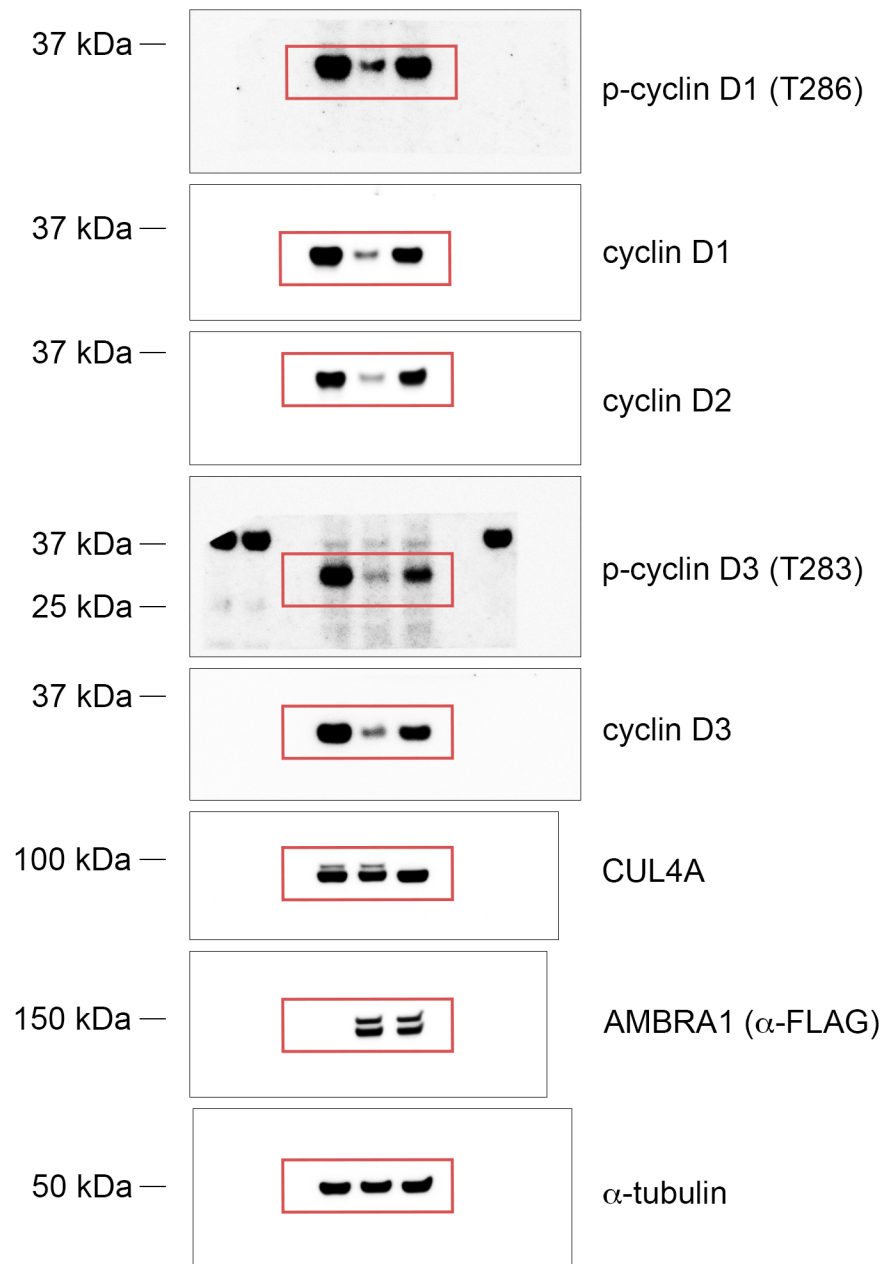

### Extended Data Figure 3b

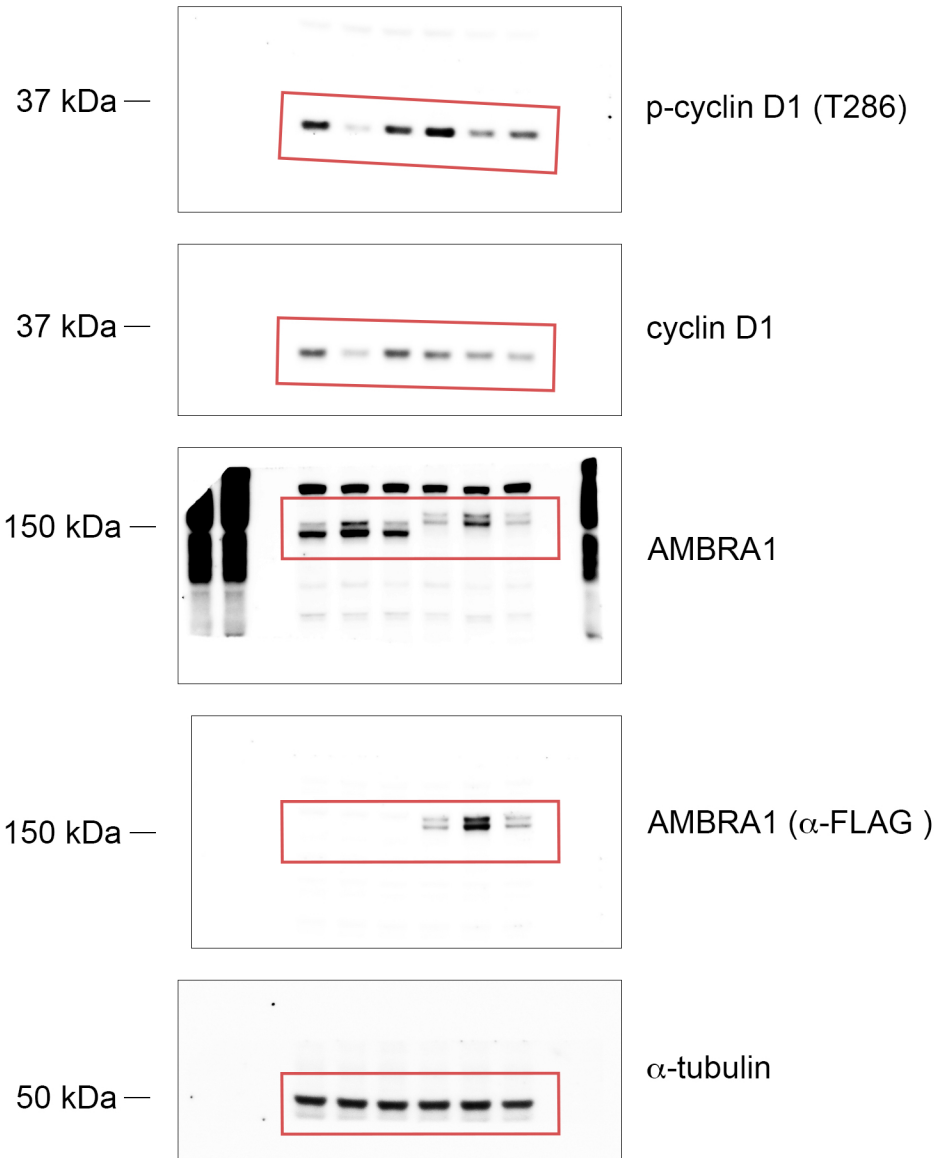



### Extended Data Figure 3c

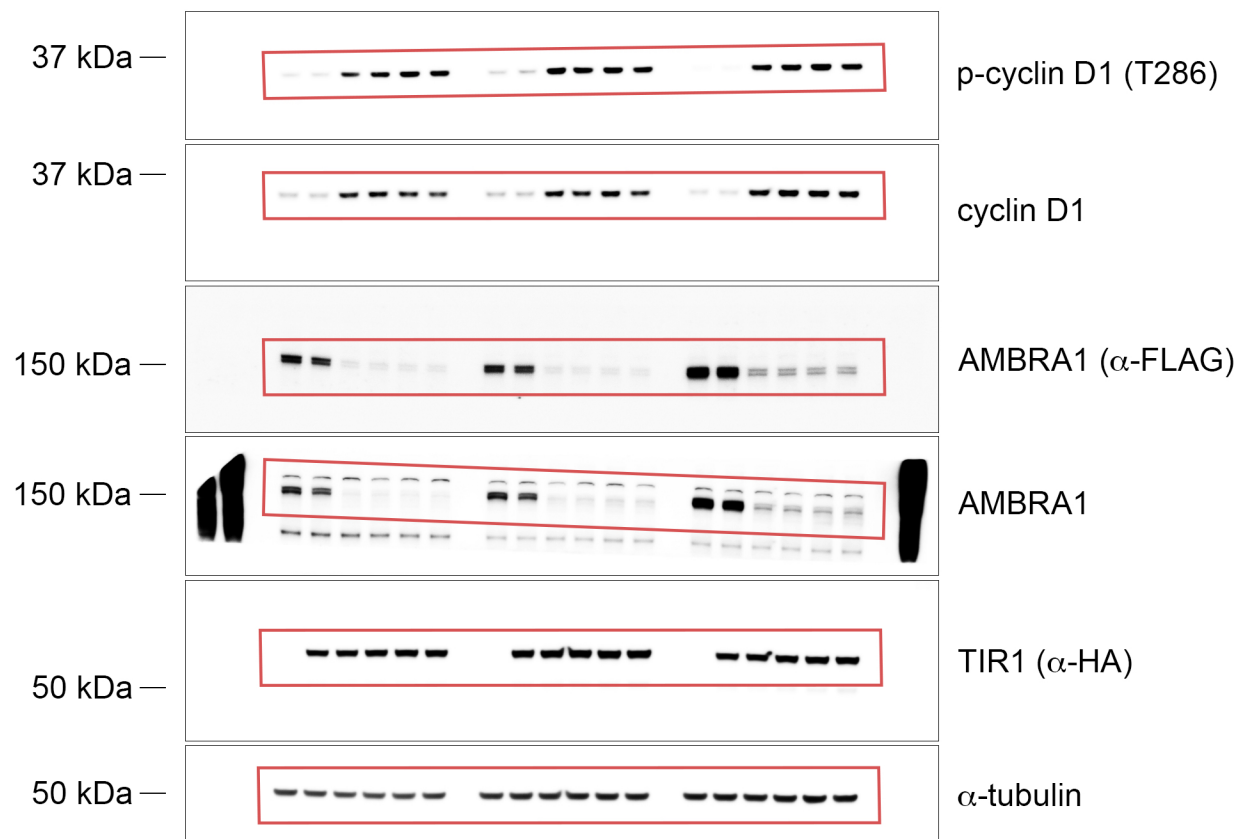

Extended Data Figure 3d

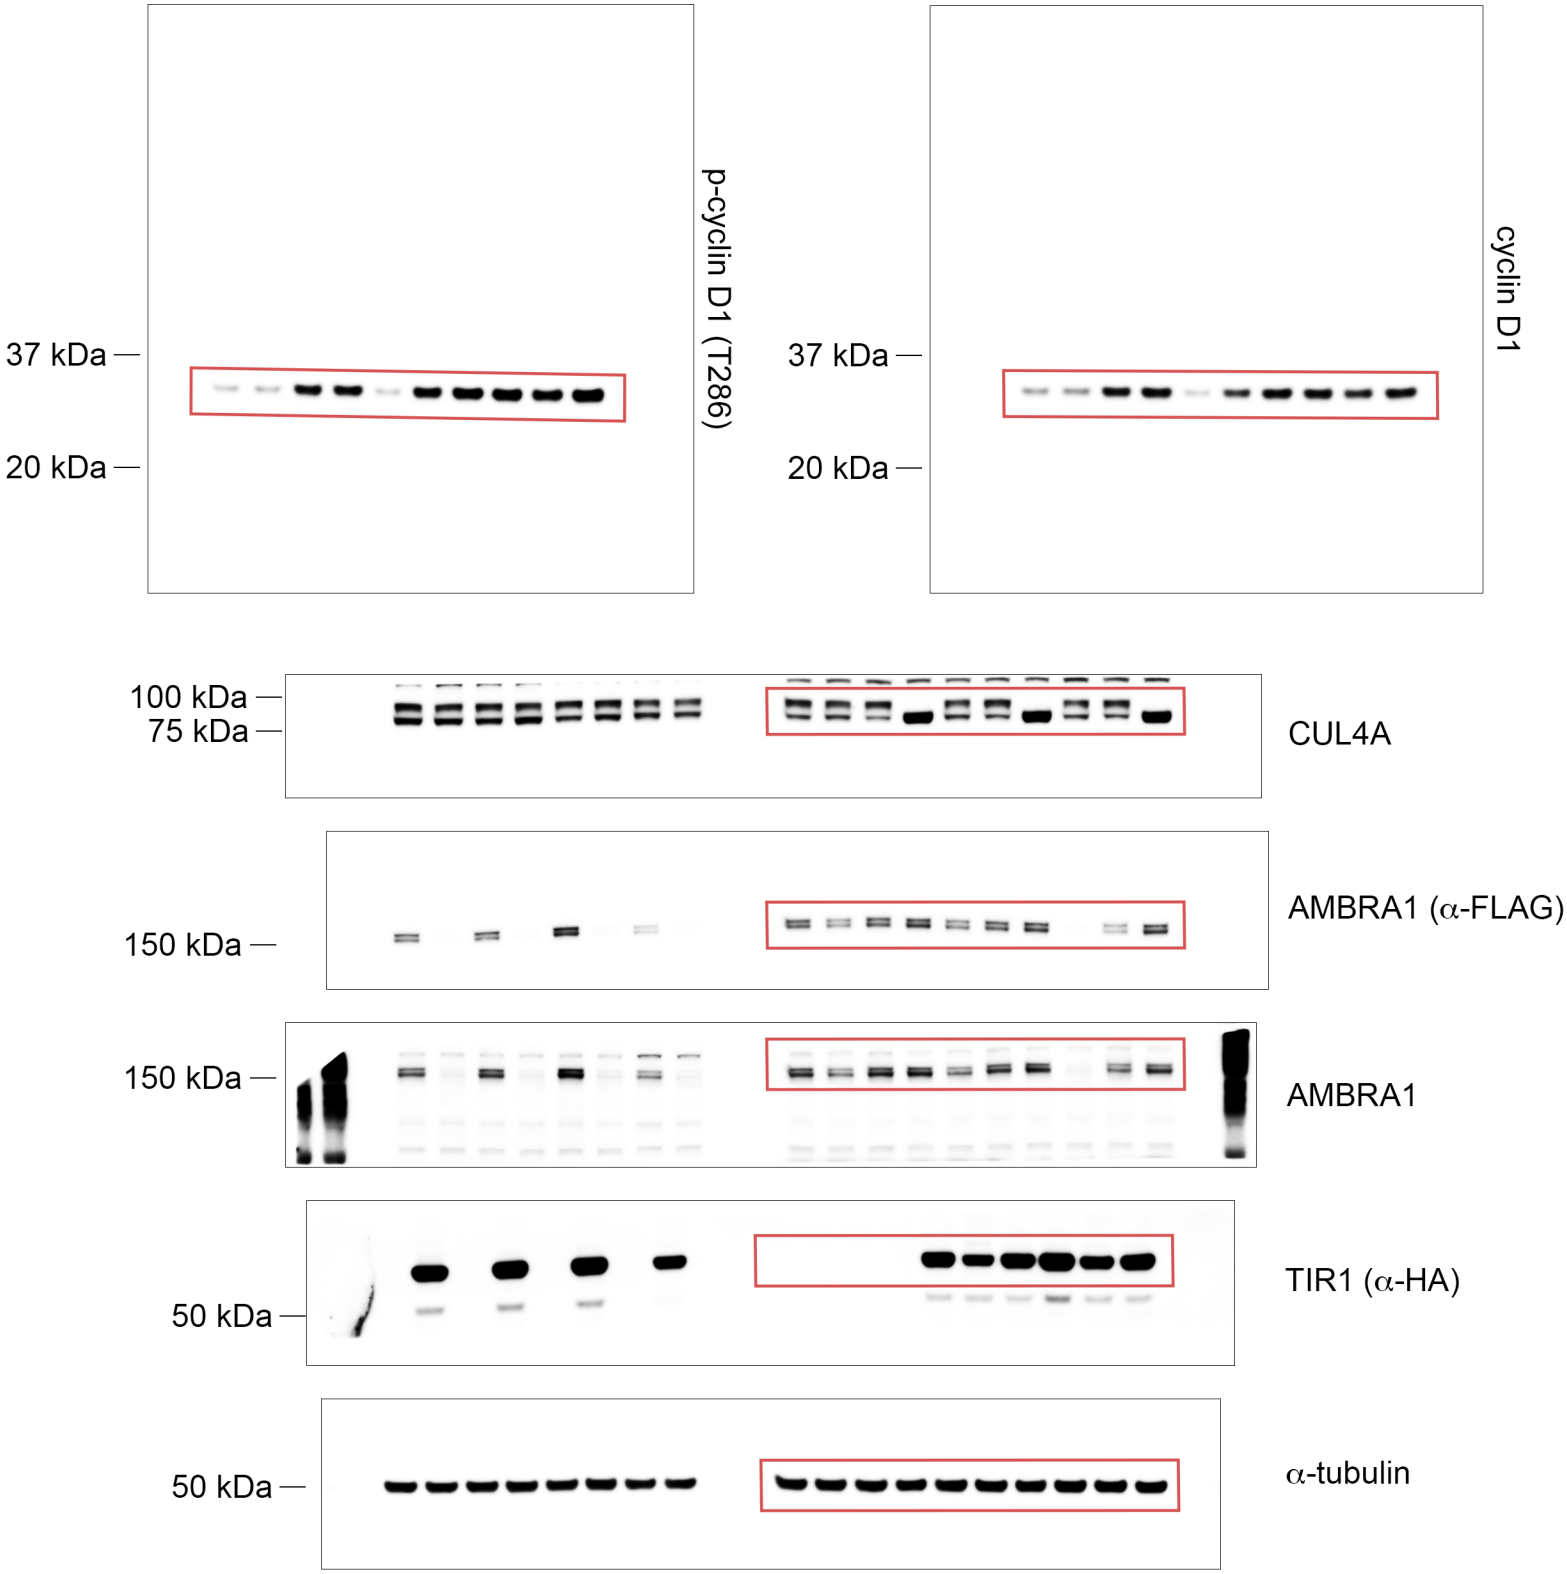

**Extended Data Figure 3e**

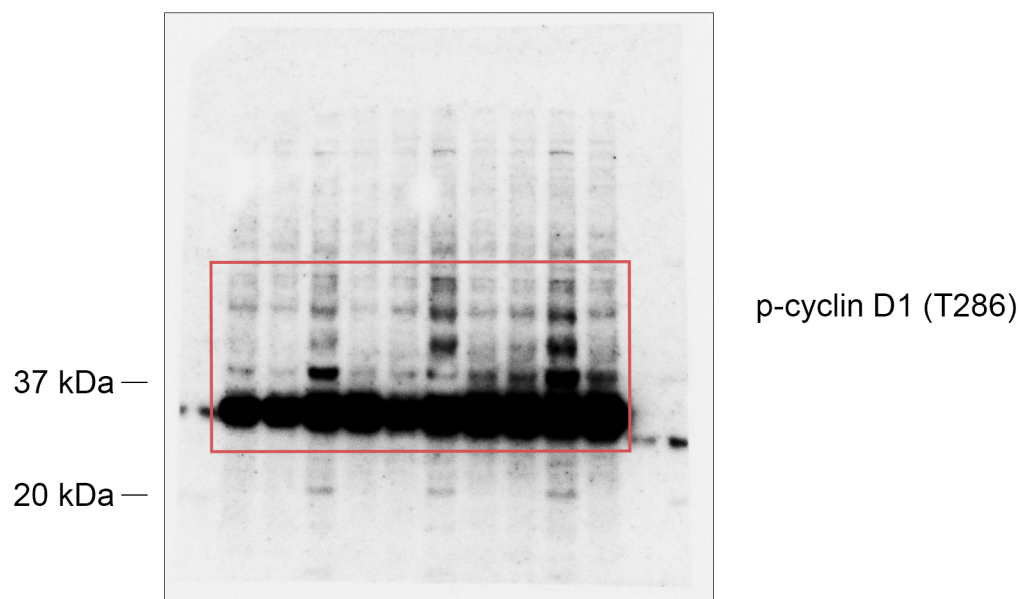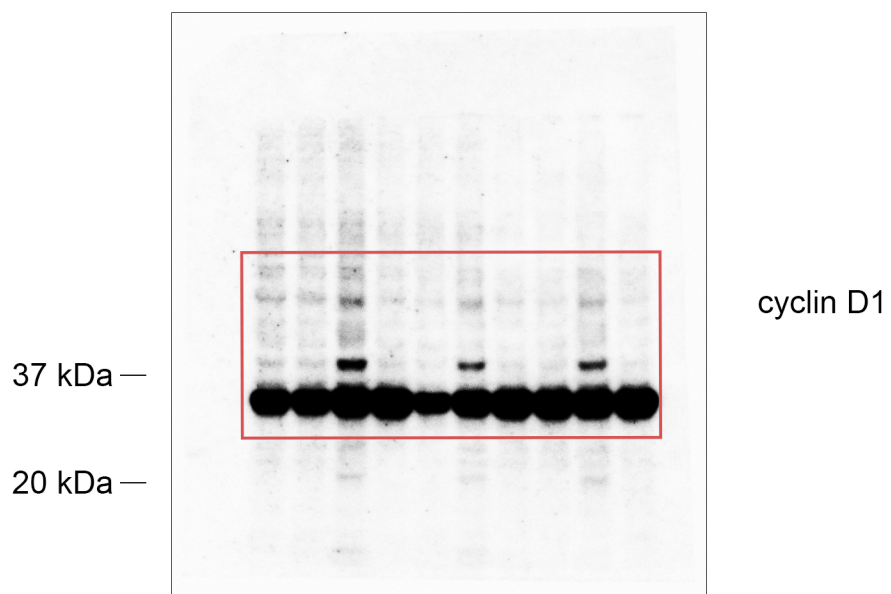

**Extended Data Figure 3f - See above**

# Extended Data Figure 4c

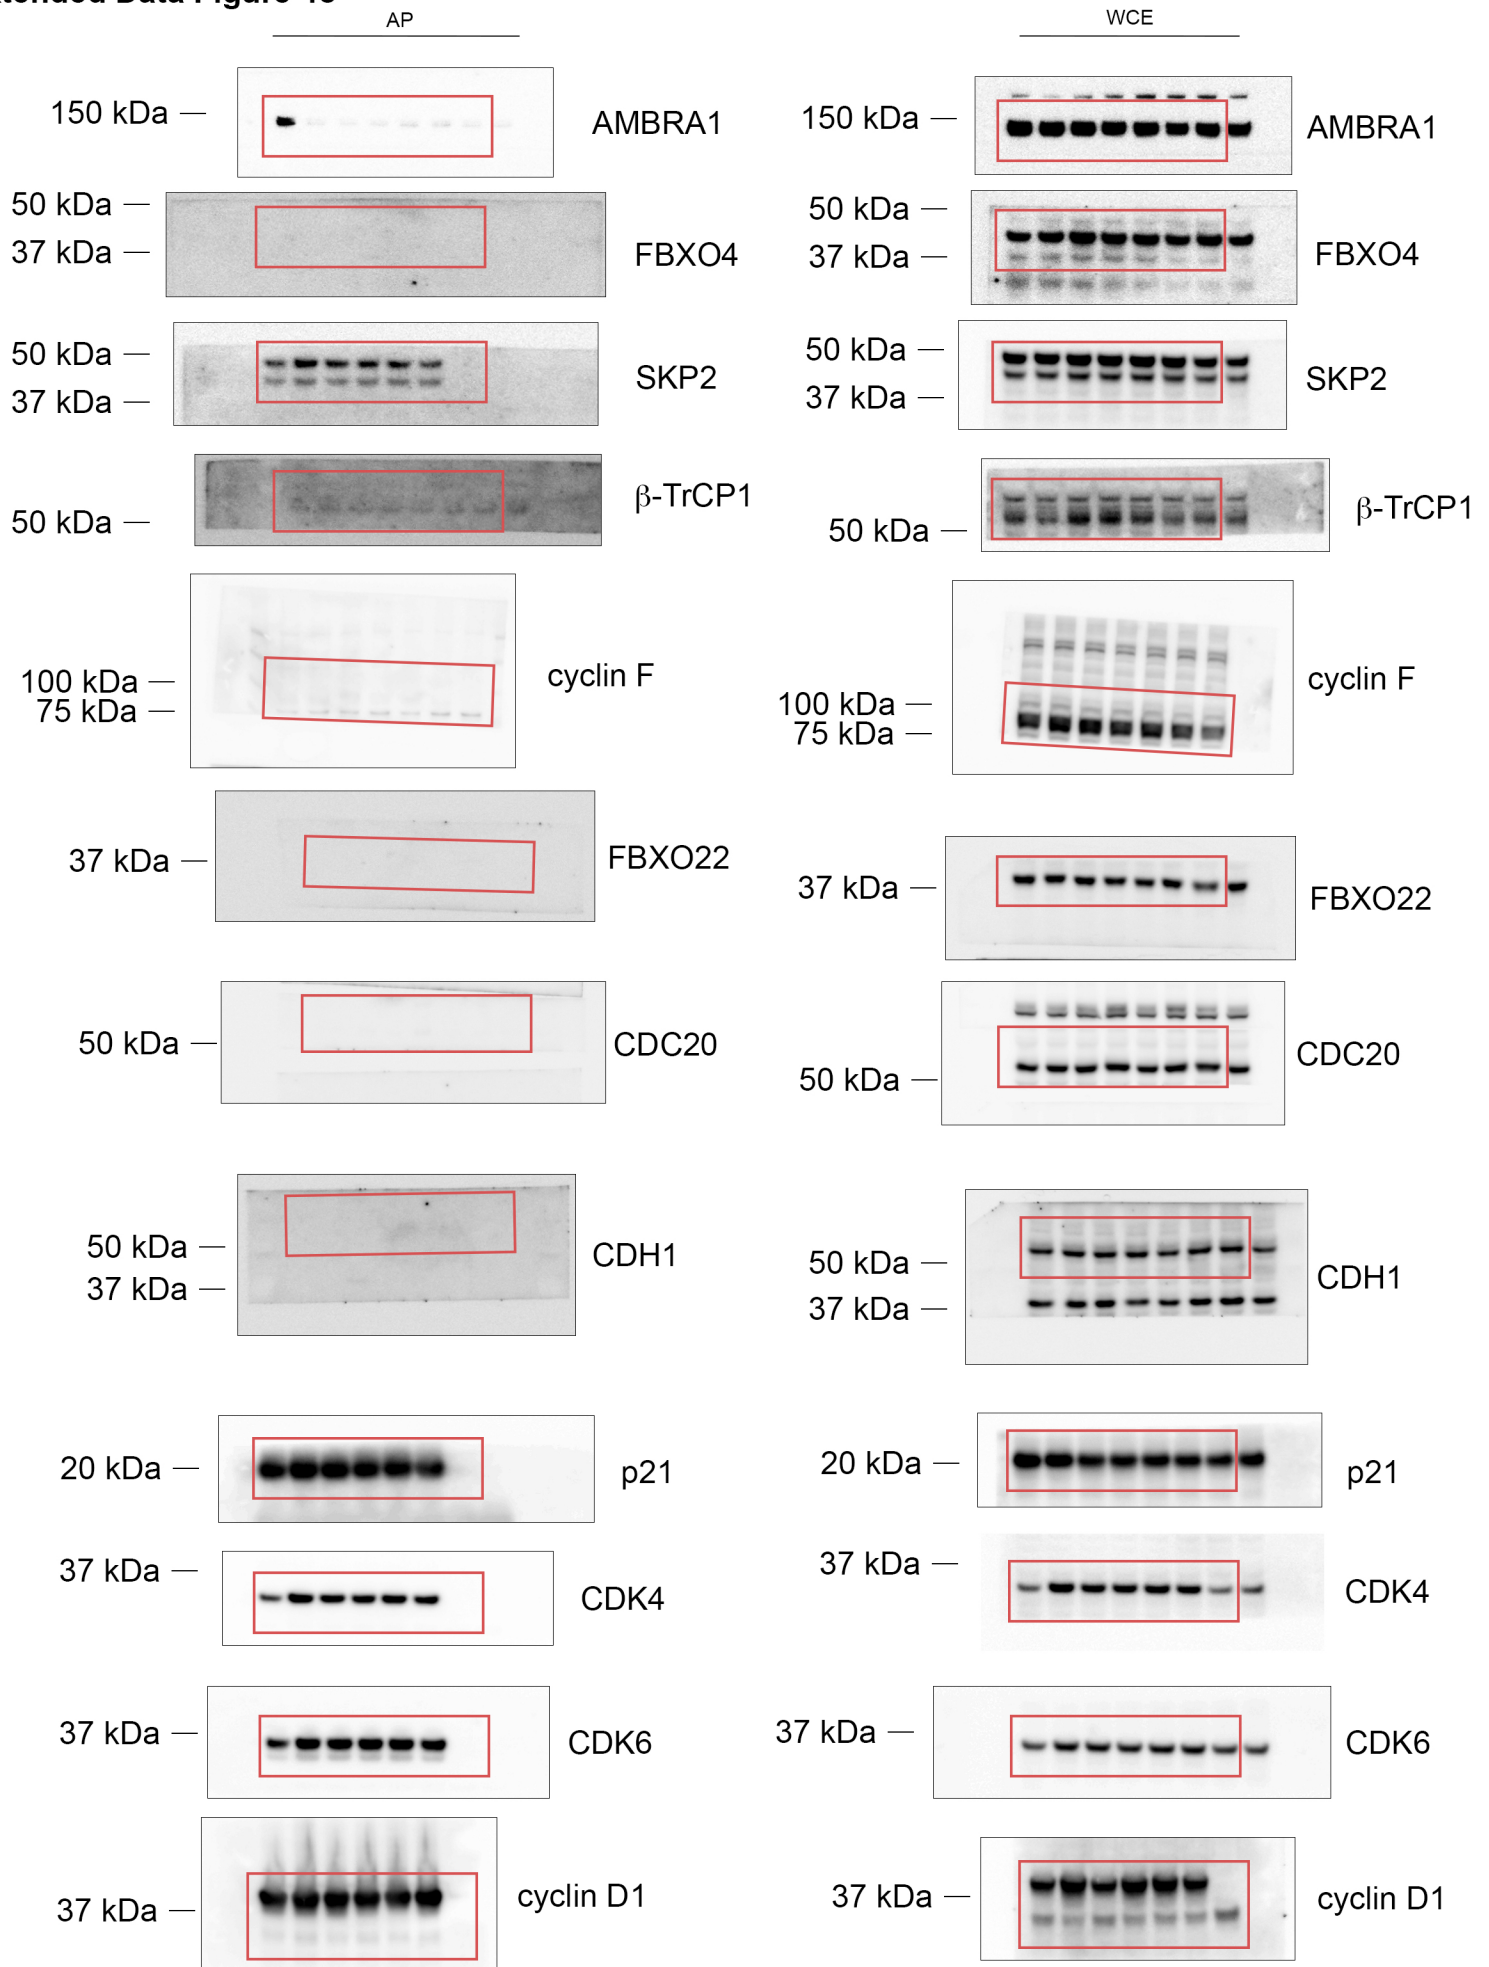

### Extended Data Figure 4d

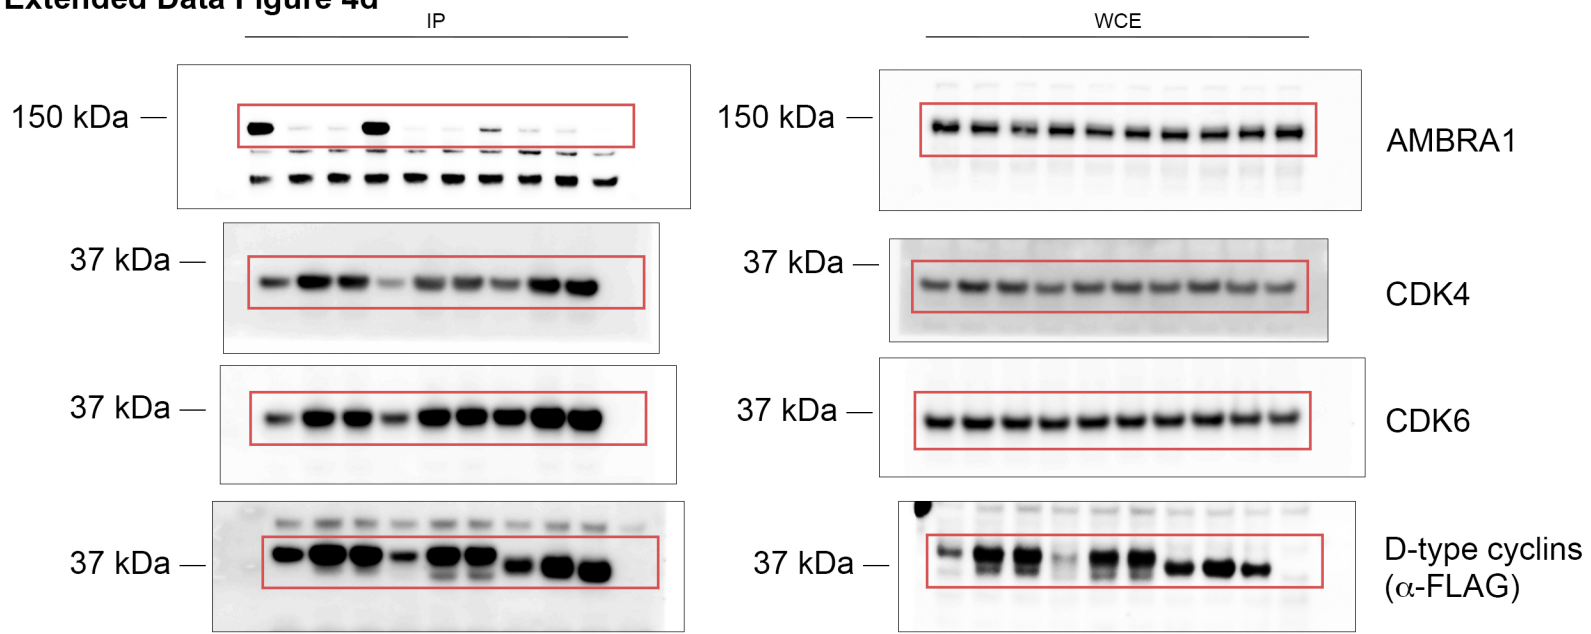

### Extended Data Figure 4k

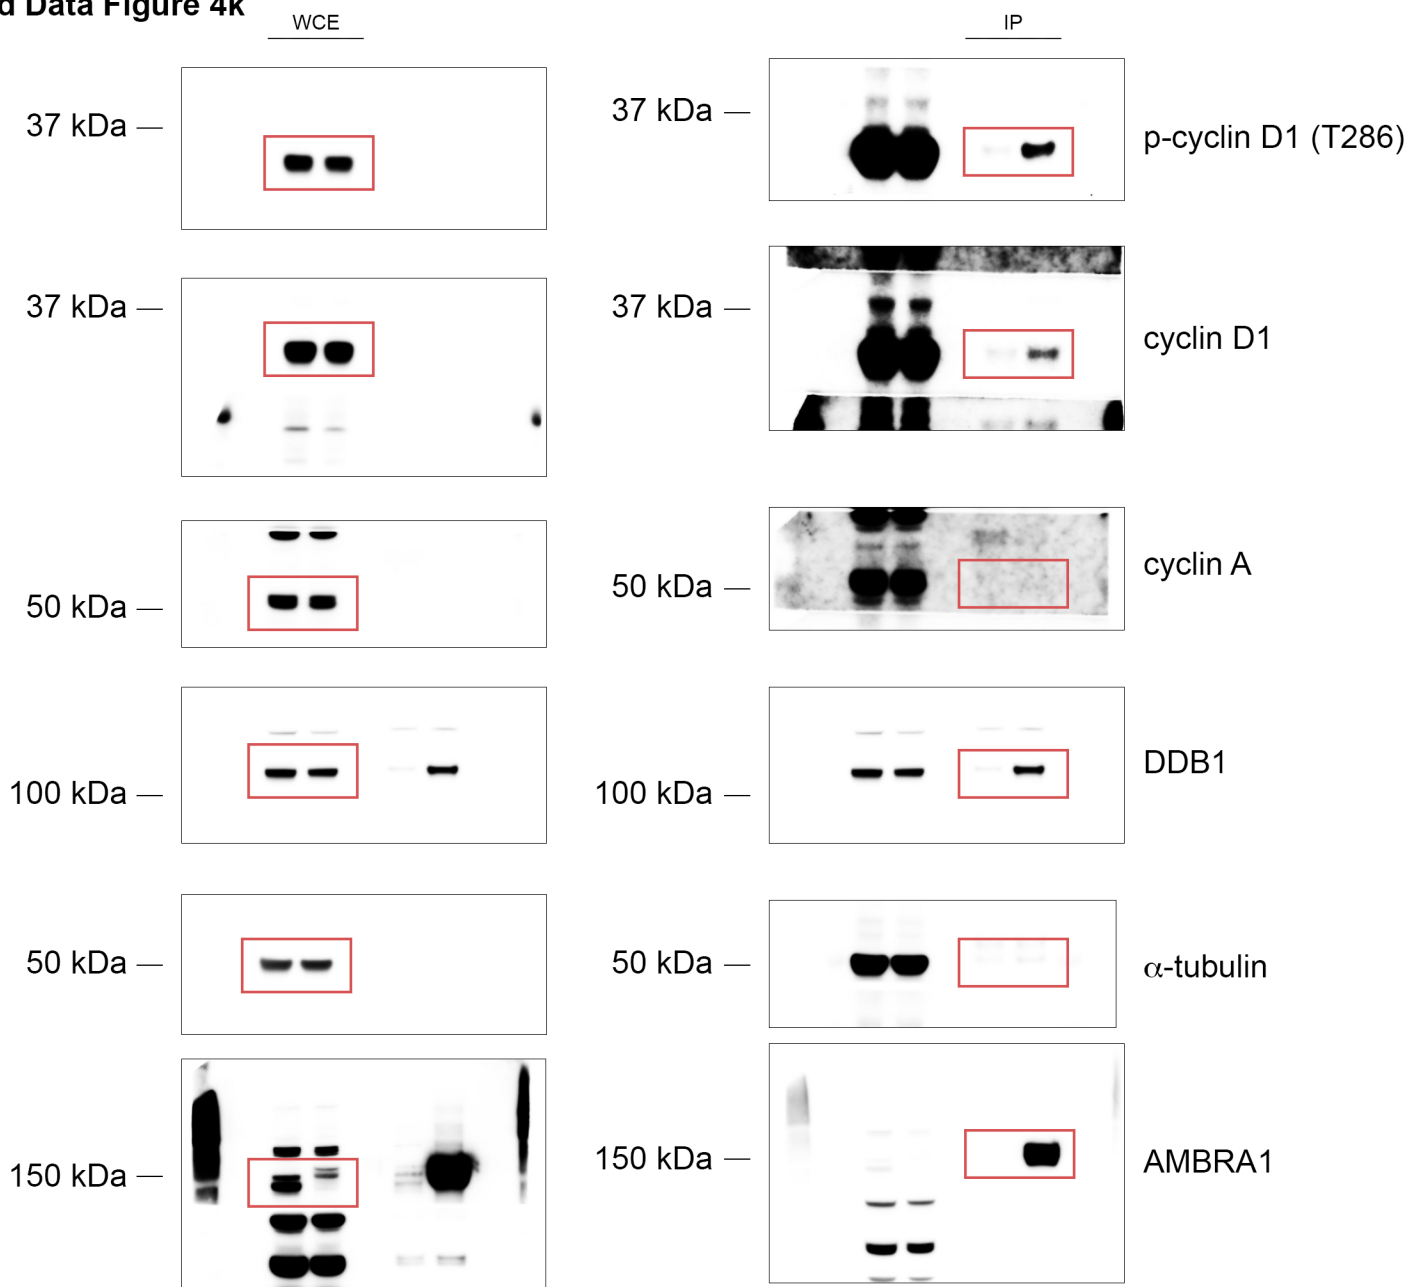

### Extended Data Figure 4e

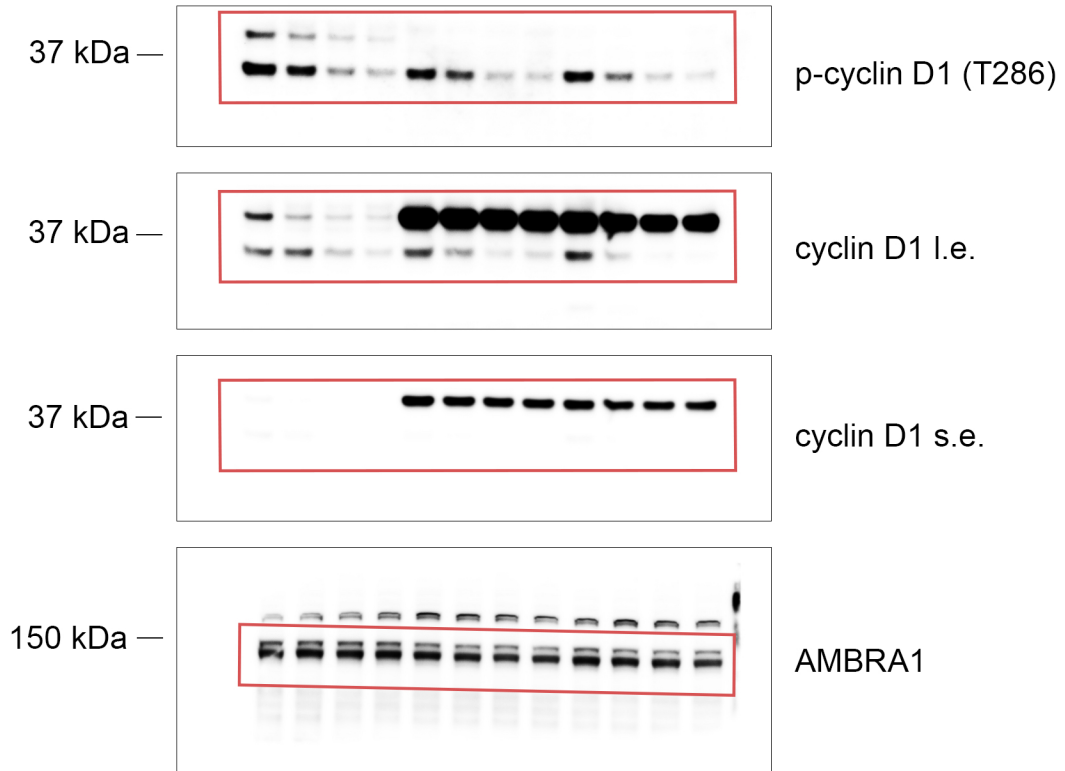

### Extended Data Figure 4f

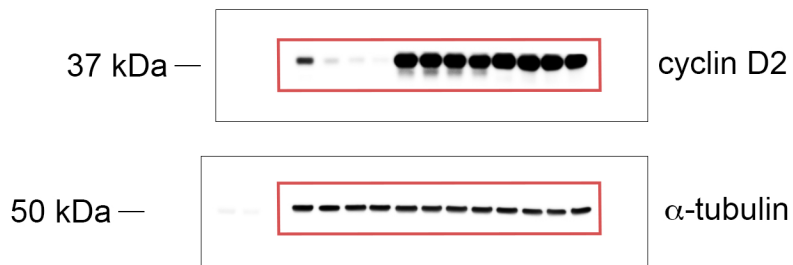

### Extended Data Figure 4g

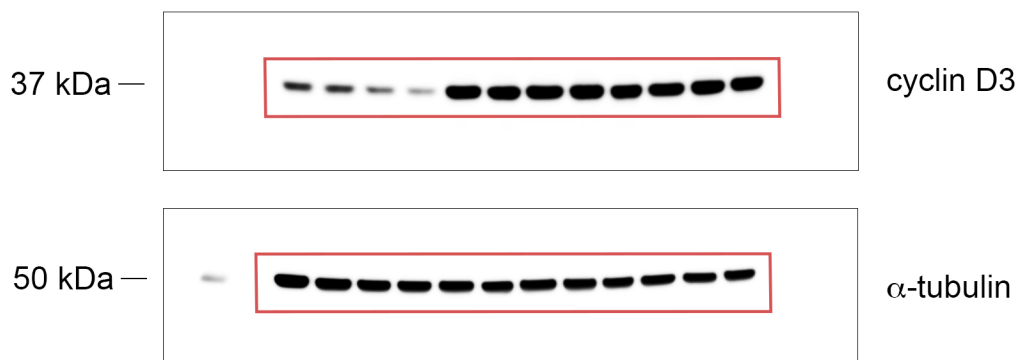

### Extended Data Figure 4h

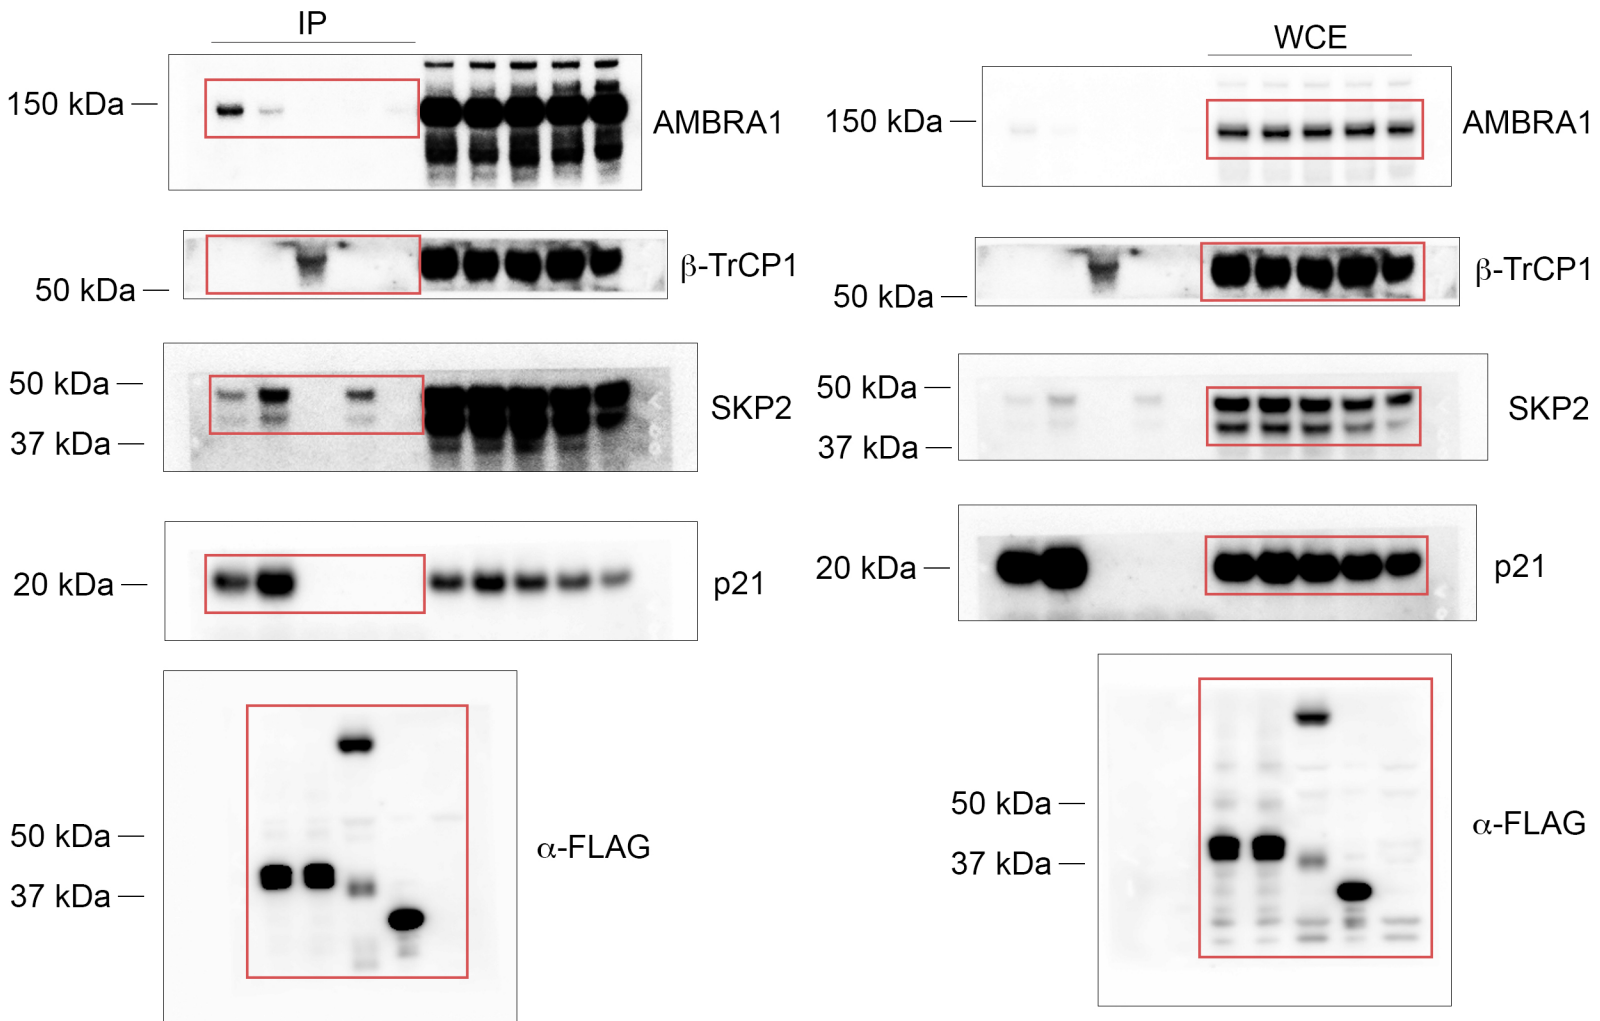

### Extended Data Figure 4i

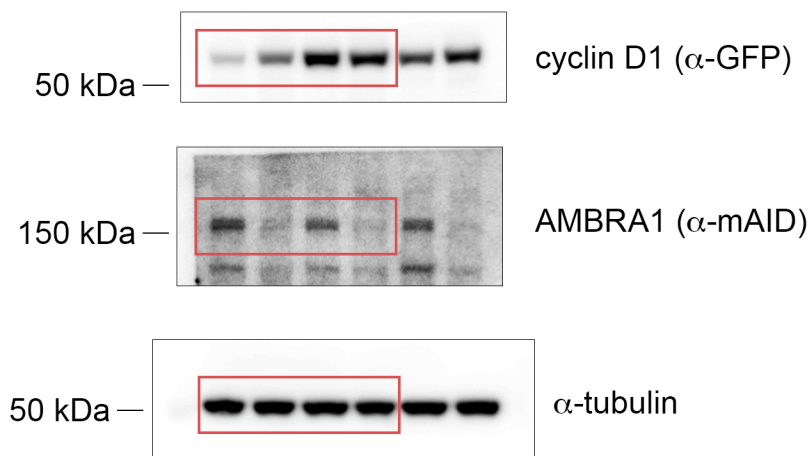

### Extended Data Figure 4i

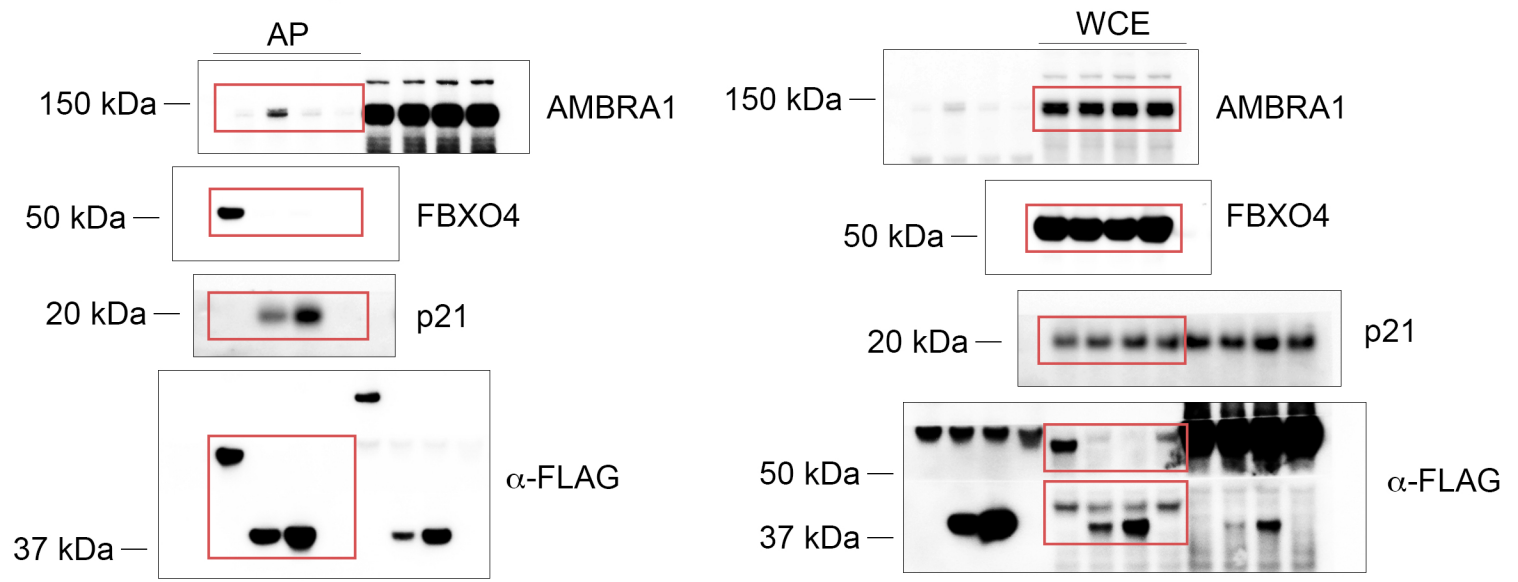

### Extended Data Figure 4j

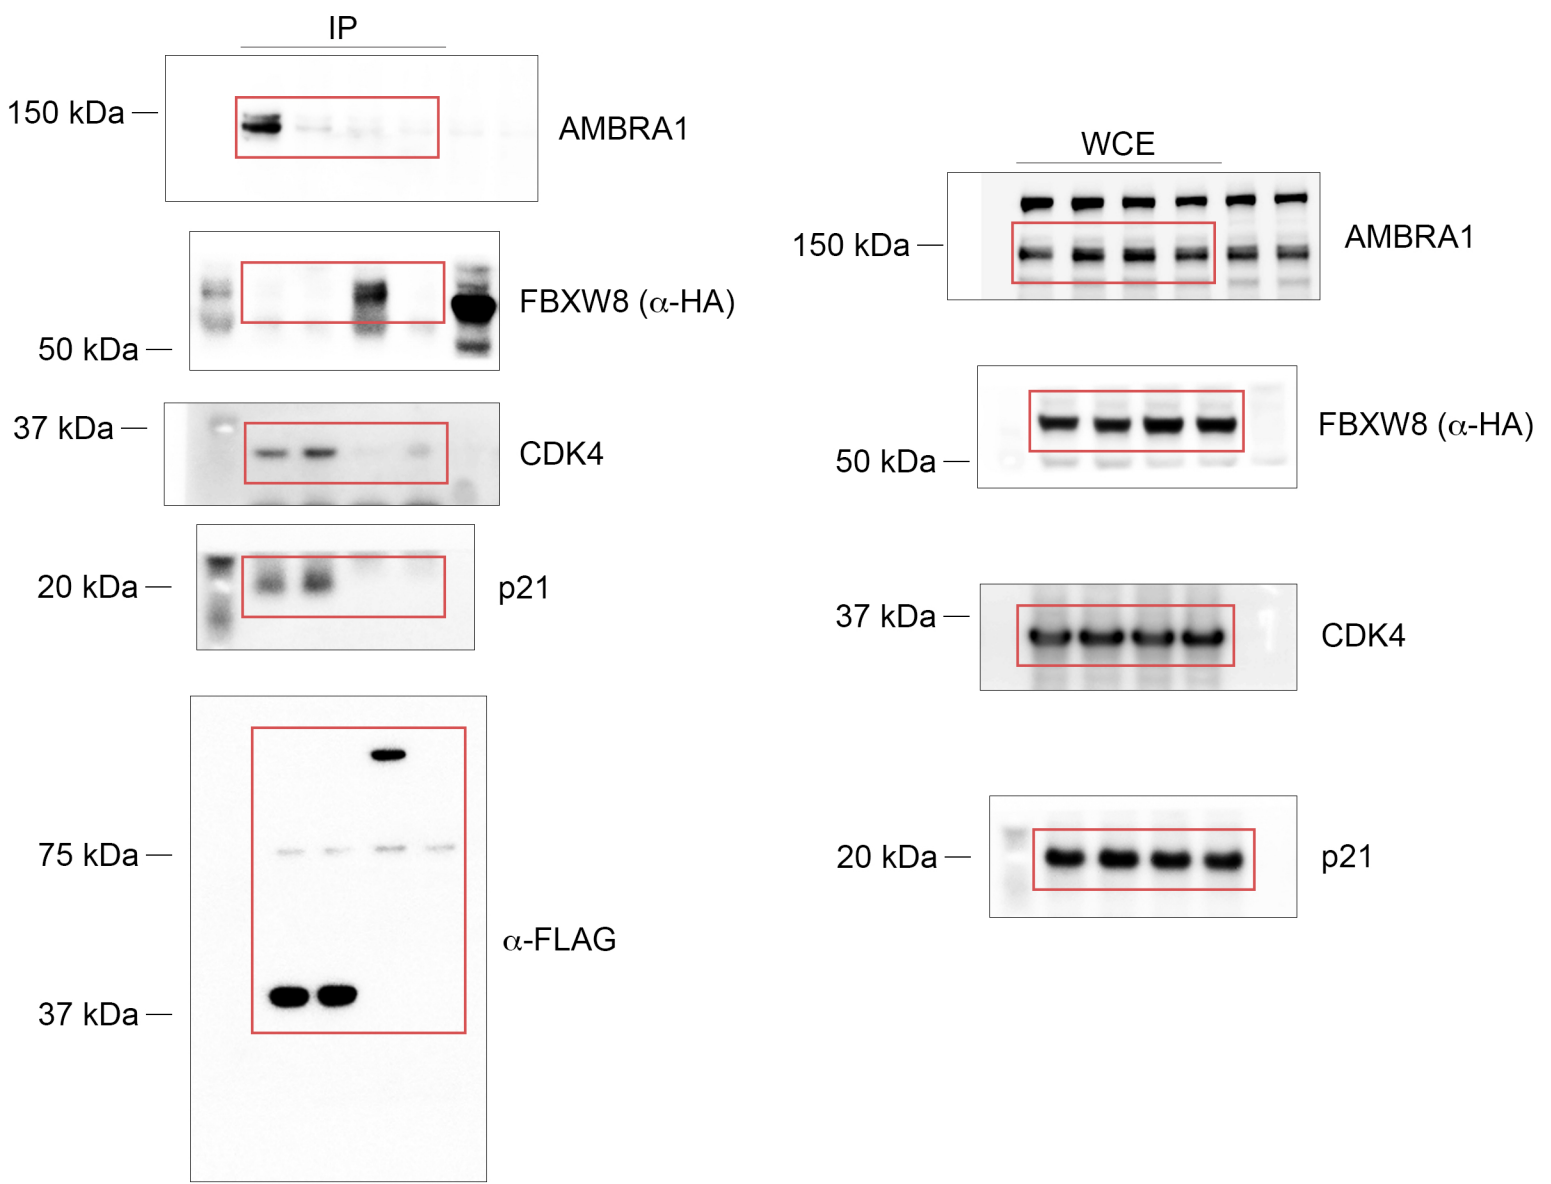



Extended Data Figure 4m

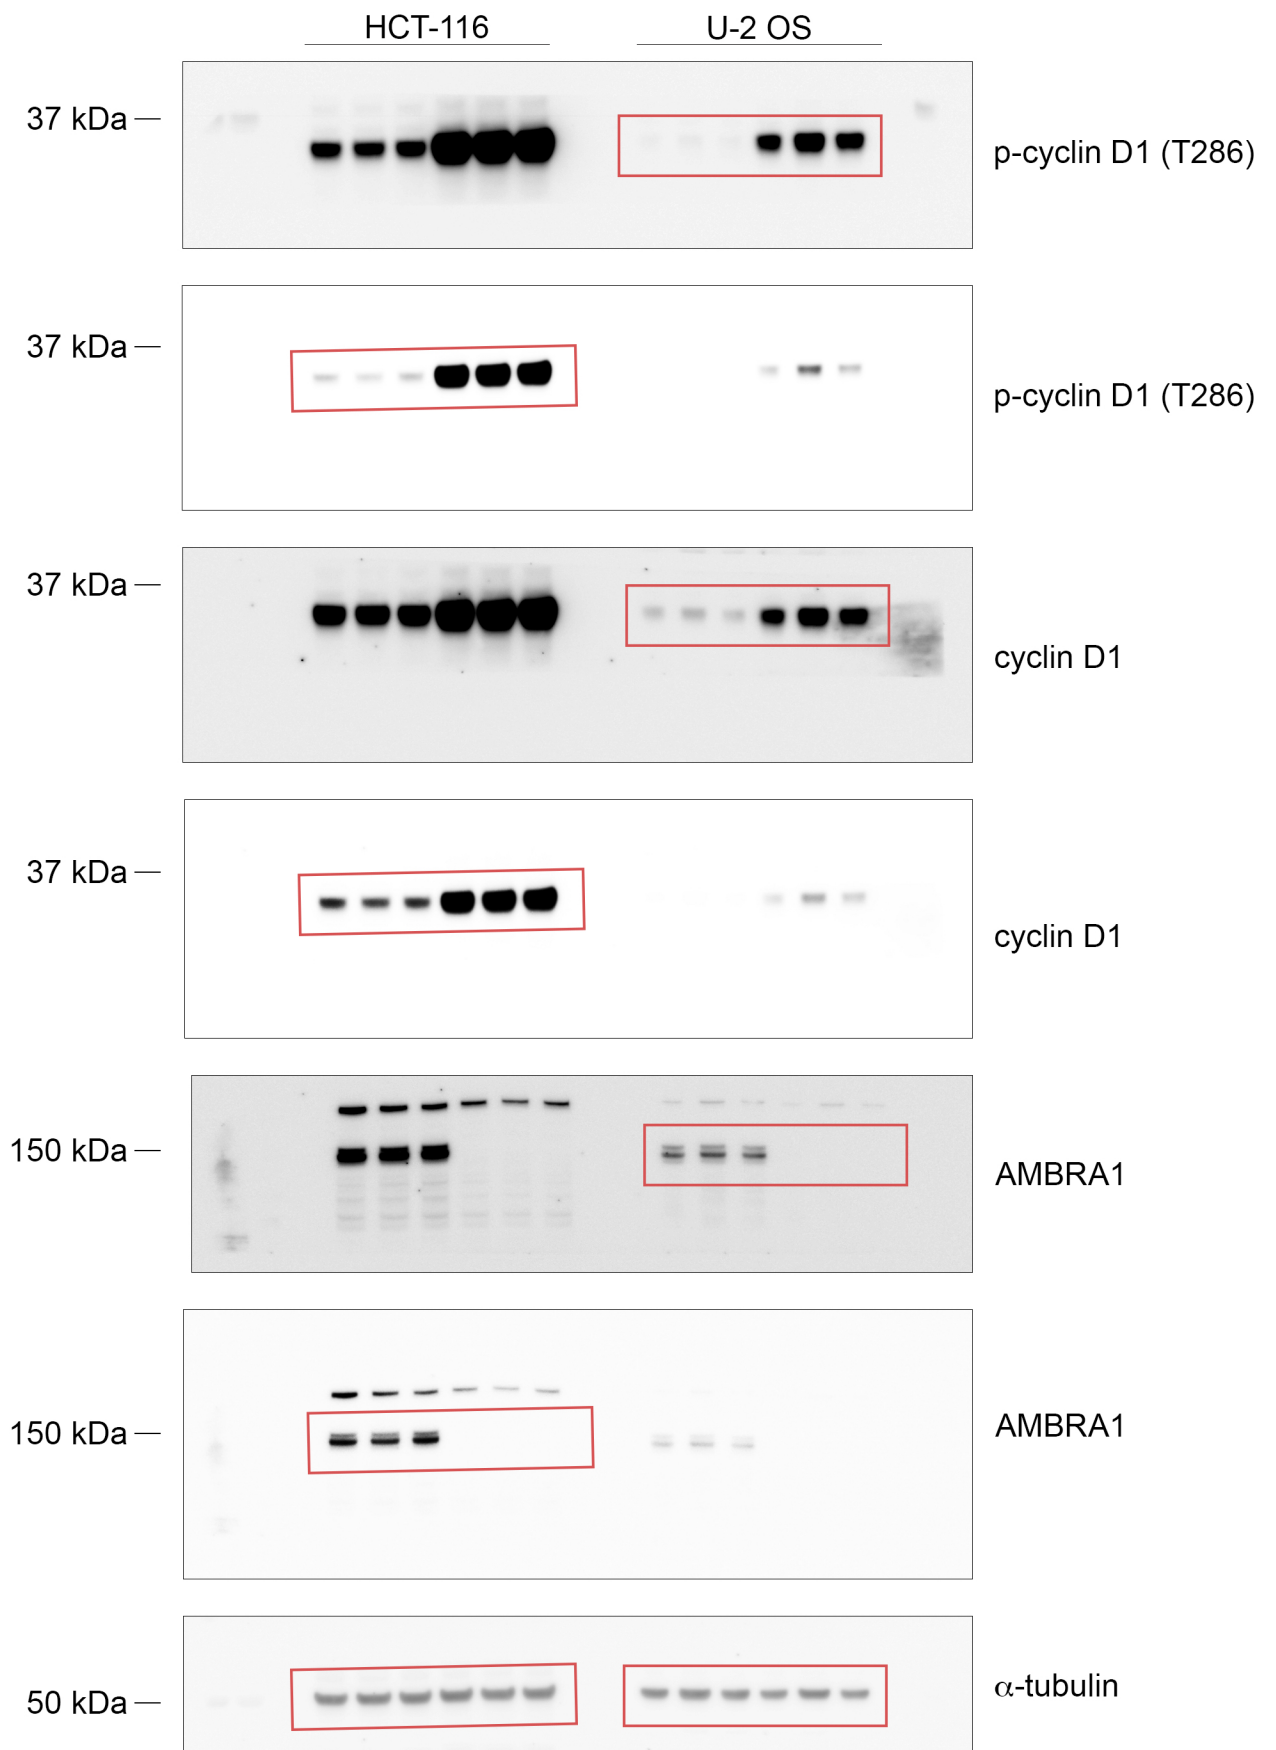

# Extended Data Figure 4n

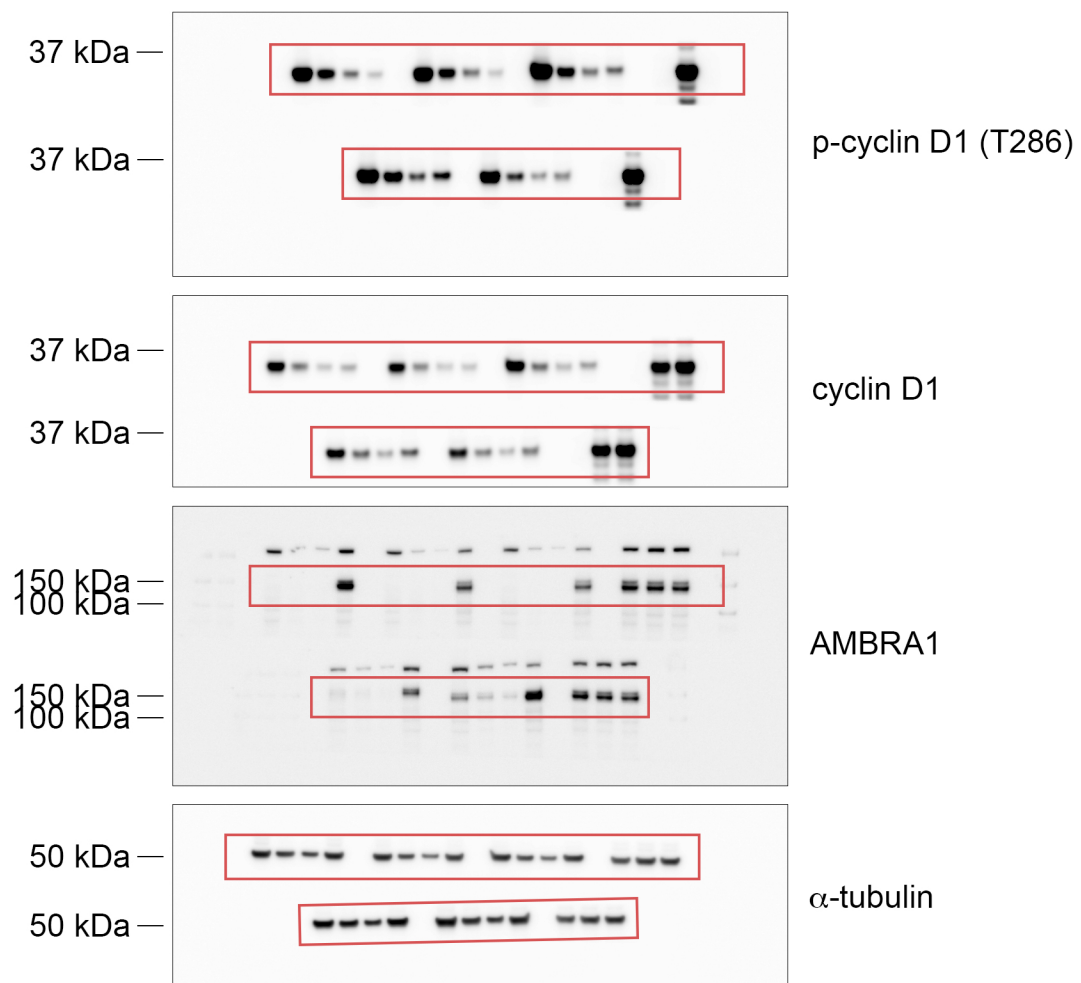

Extended Data Figure 4n - *continued*

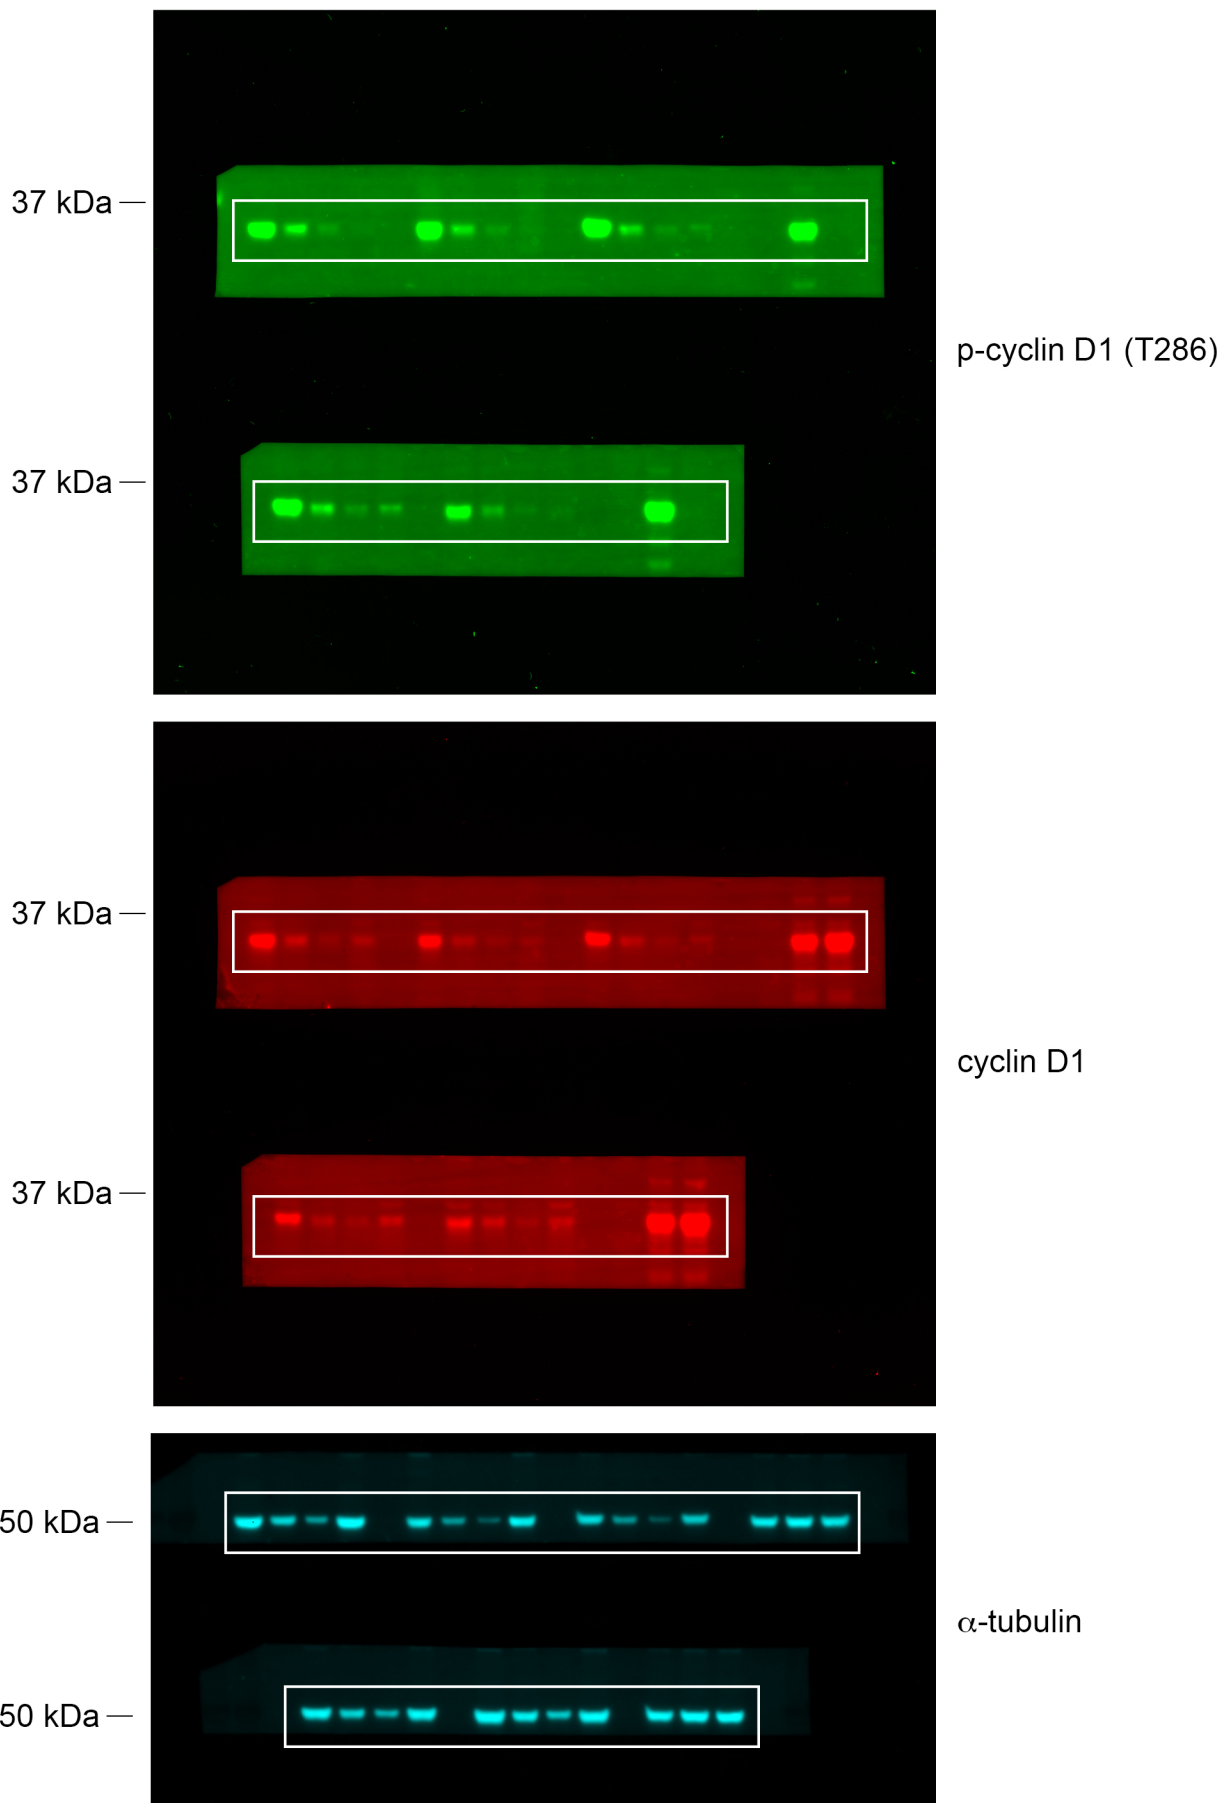

### Extended Data Figure 4p

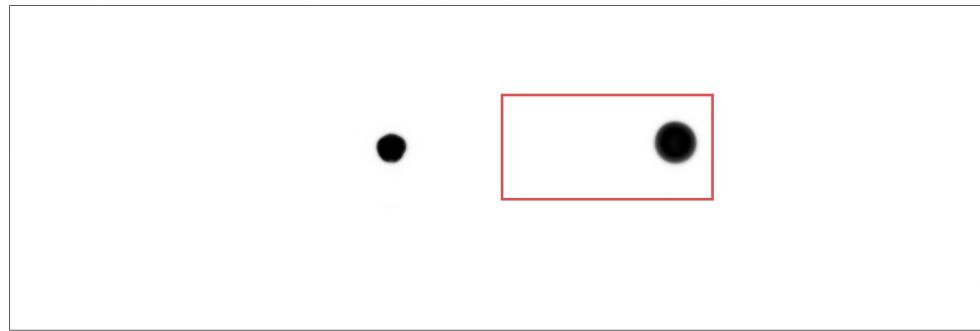

p-cyclin D1 (T286)

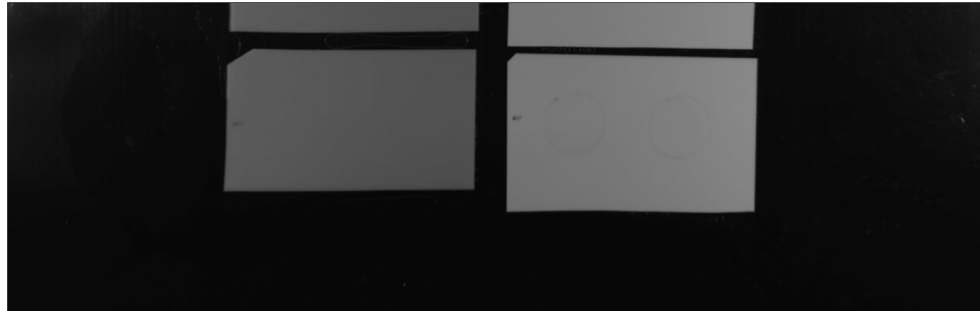

p-cyclin D1 (T286)  
Membrane Digital Image

### Extended Data Figure 4q

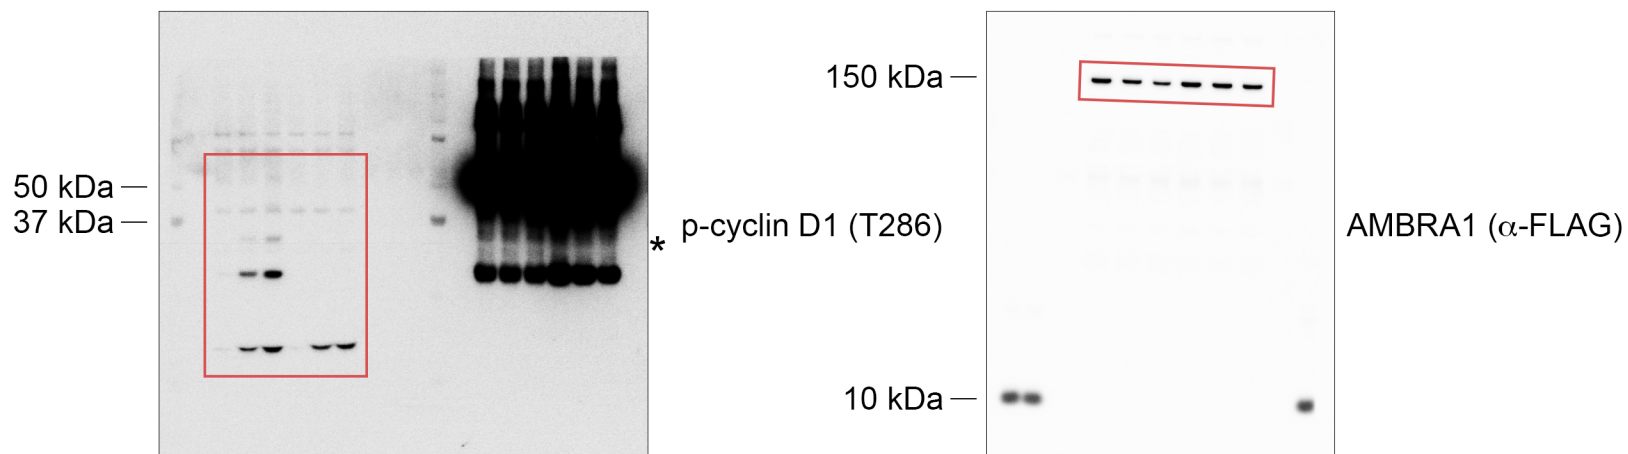

\* Indicates a row of dead pixels from the CCD camera of the chemiluminescent imager

## Extended Data Figure 5b

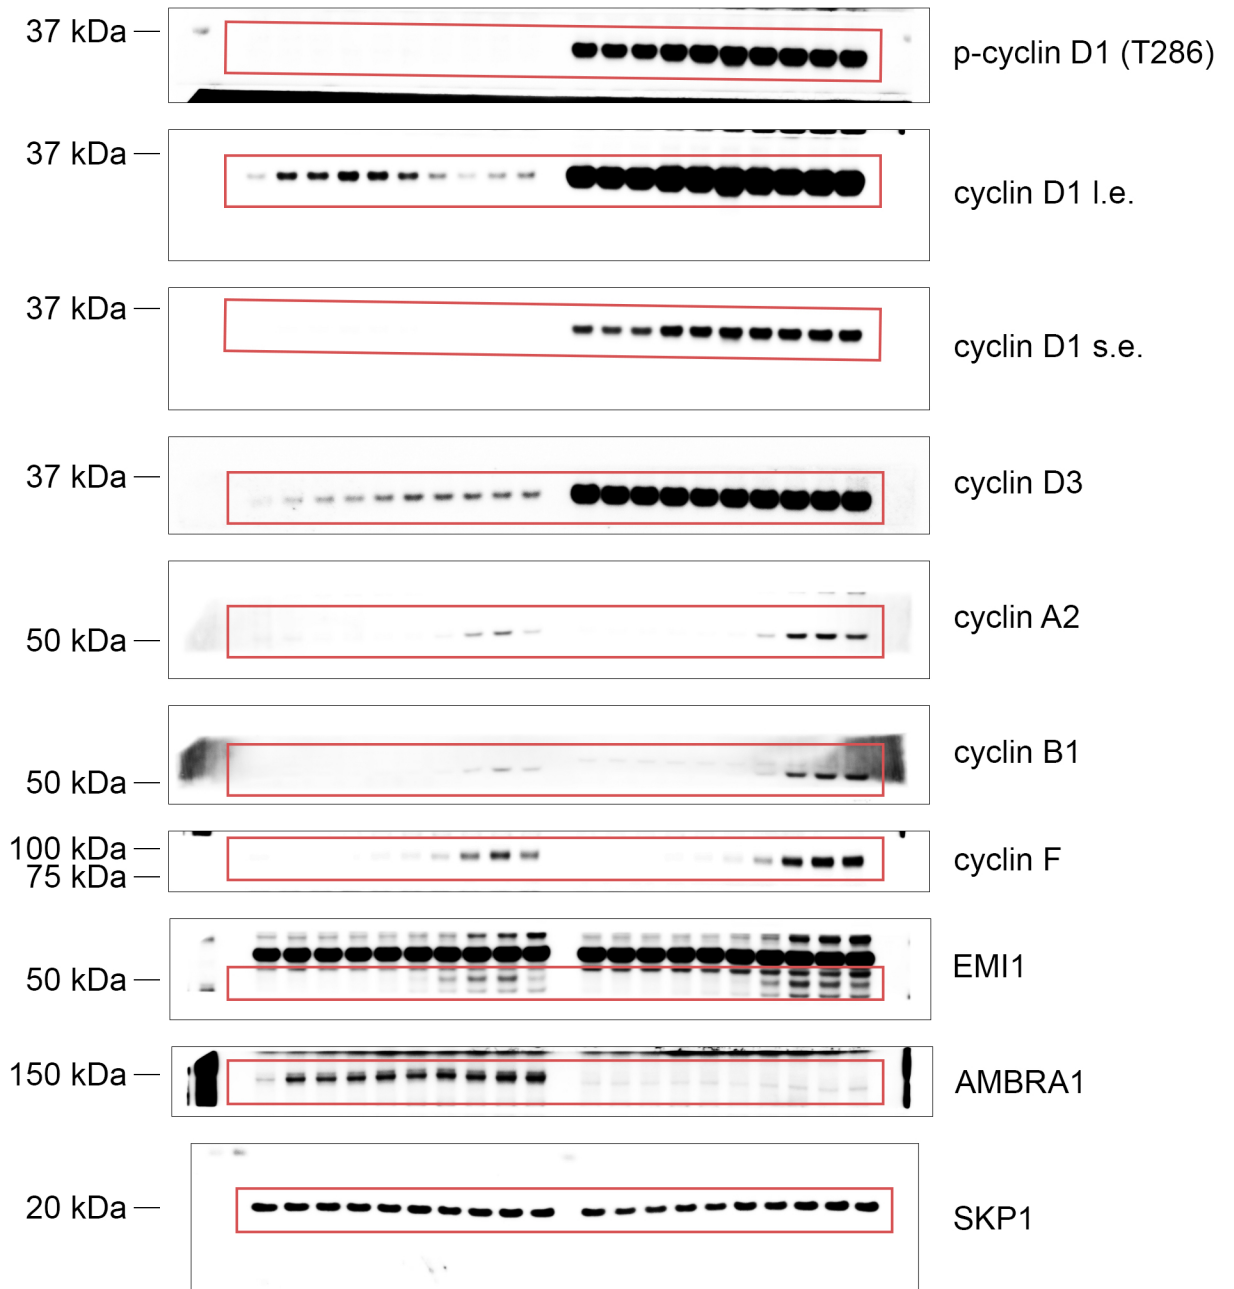

**Extended Data Figure 5e**

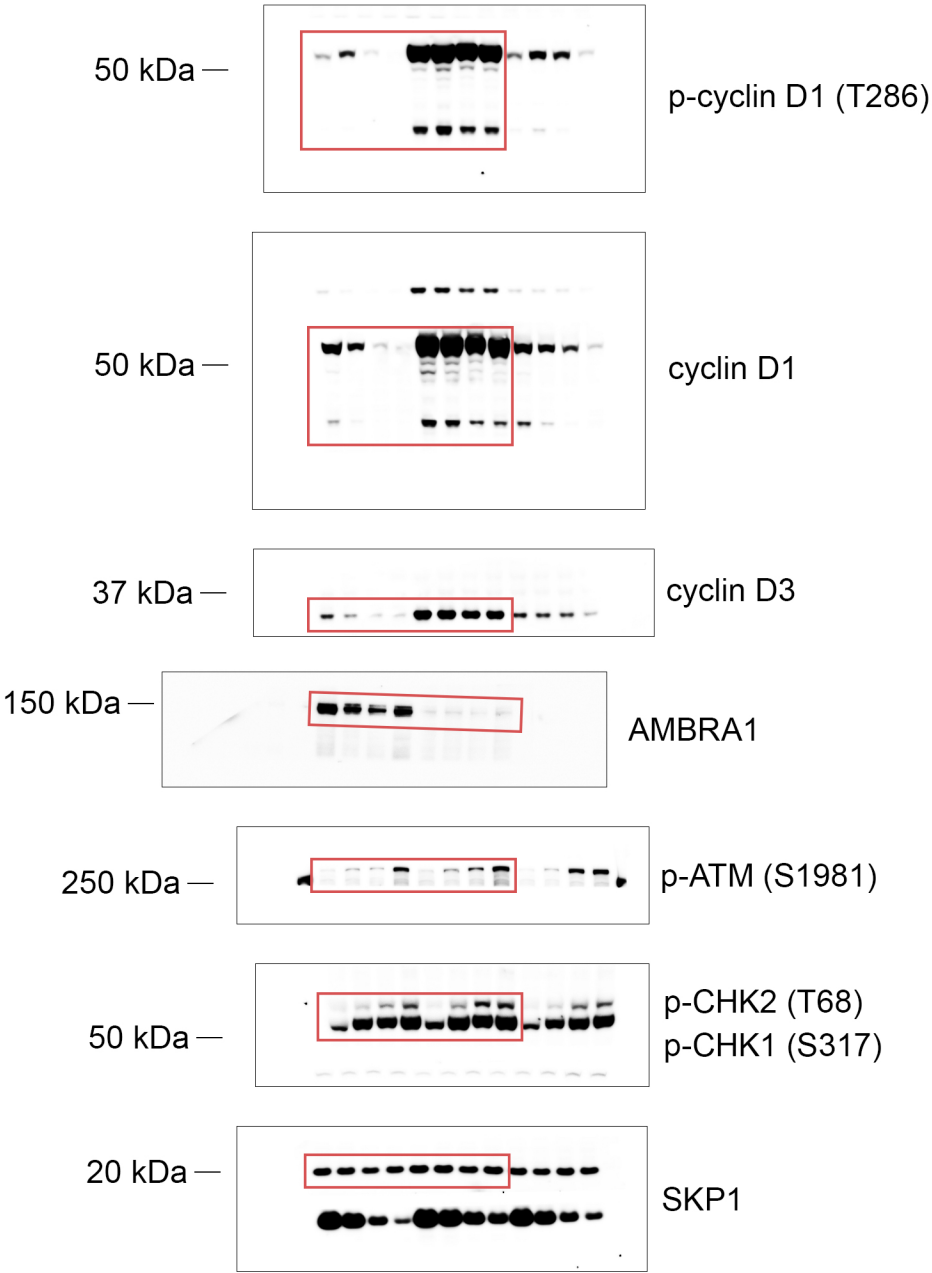

Extended Data Figure 5f

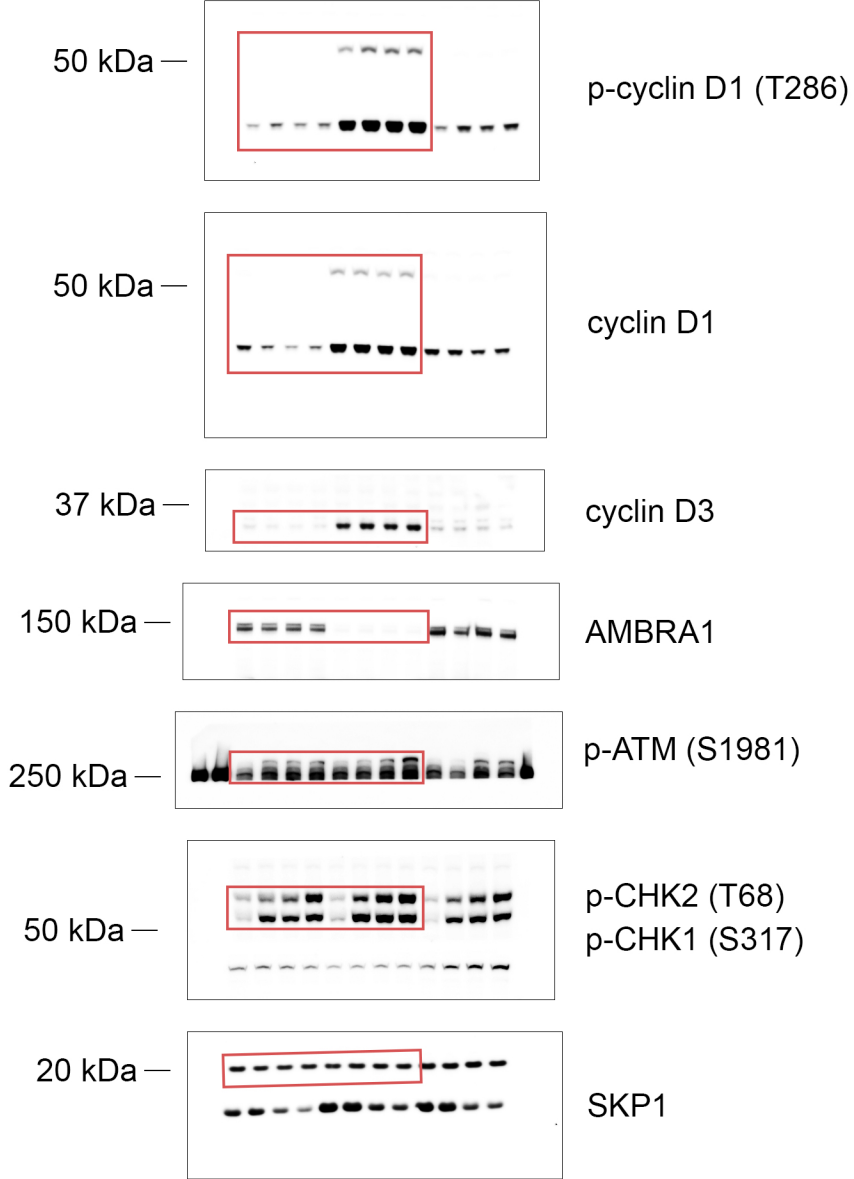

**Extended Data Figure 5g**

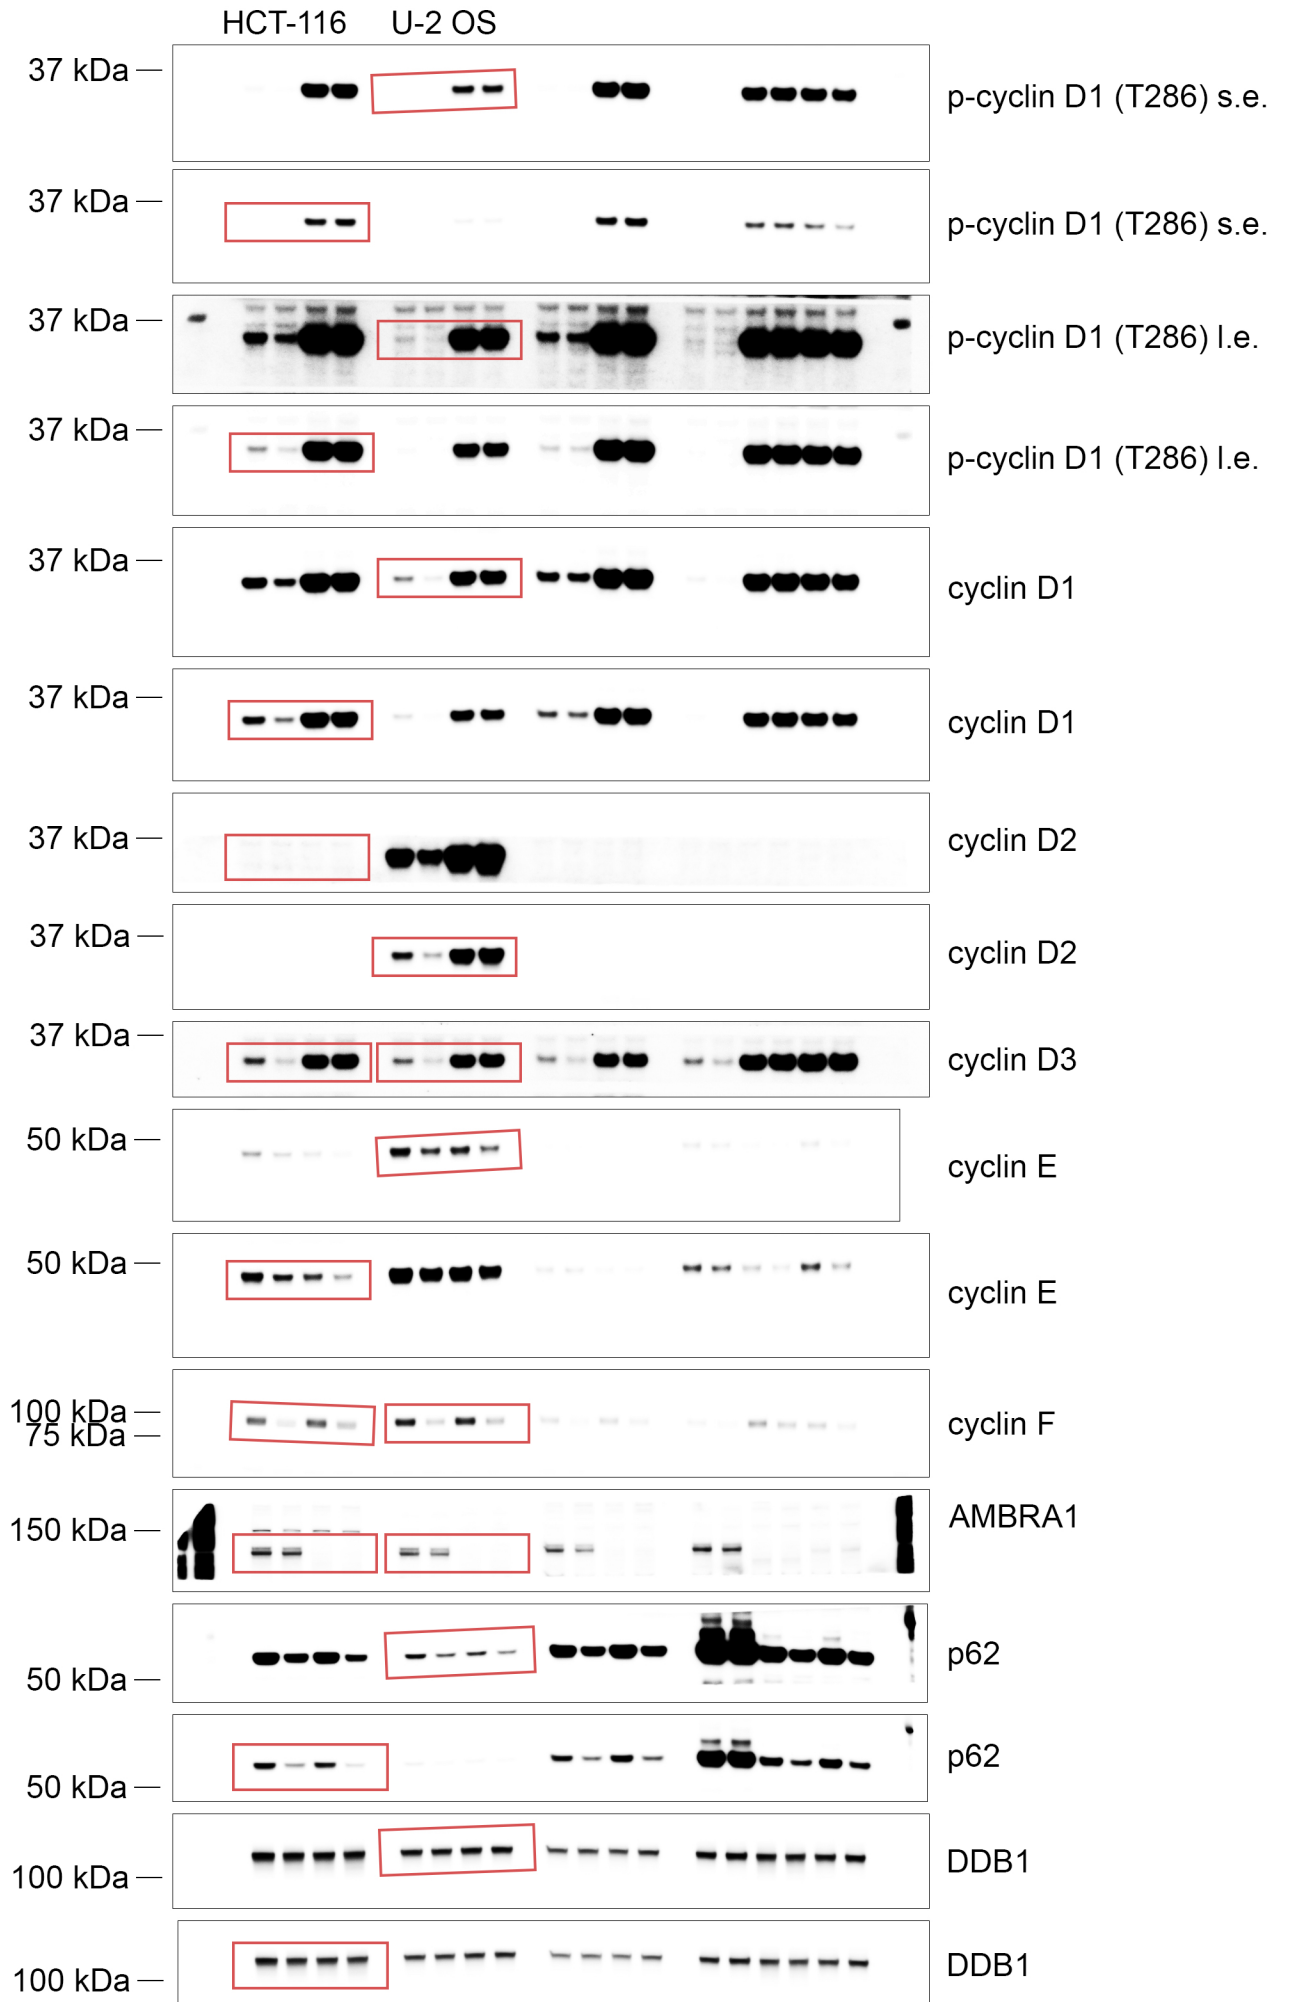



### Extended Data Figure 5h

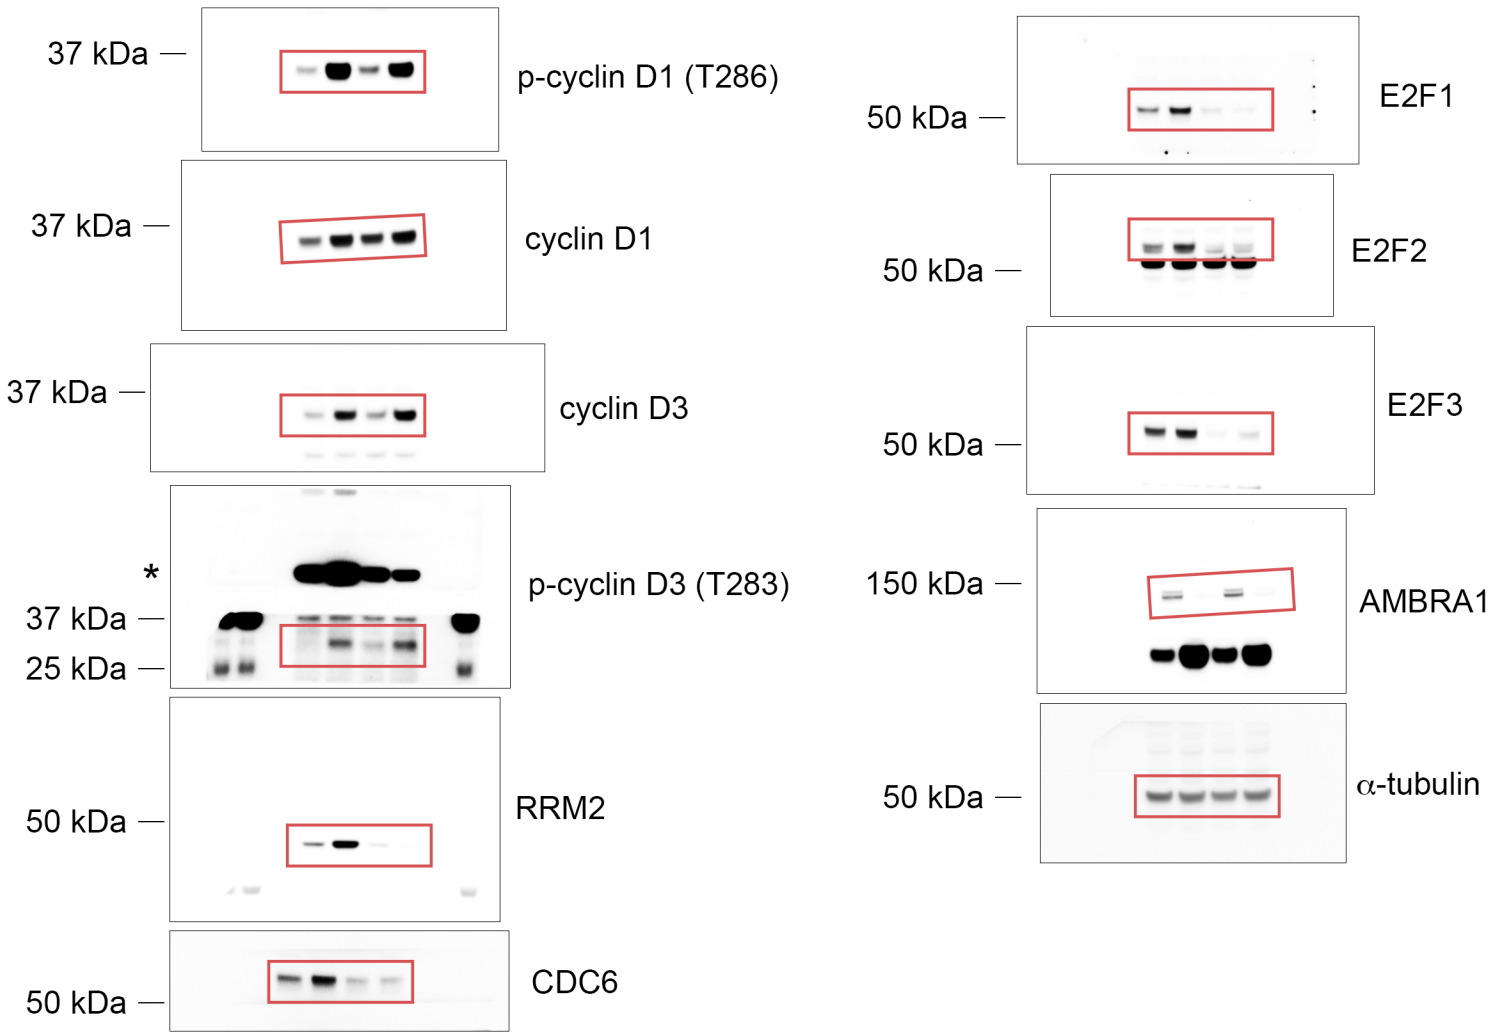

\* Indicates a row of dead pixels from the CCD camera of the chemiluminescent imager

Extended Data Figure 5k

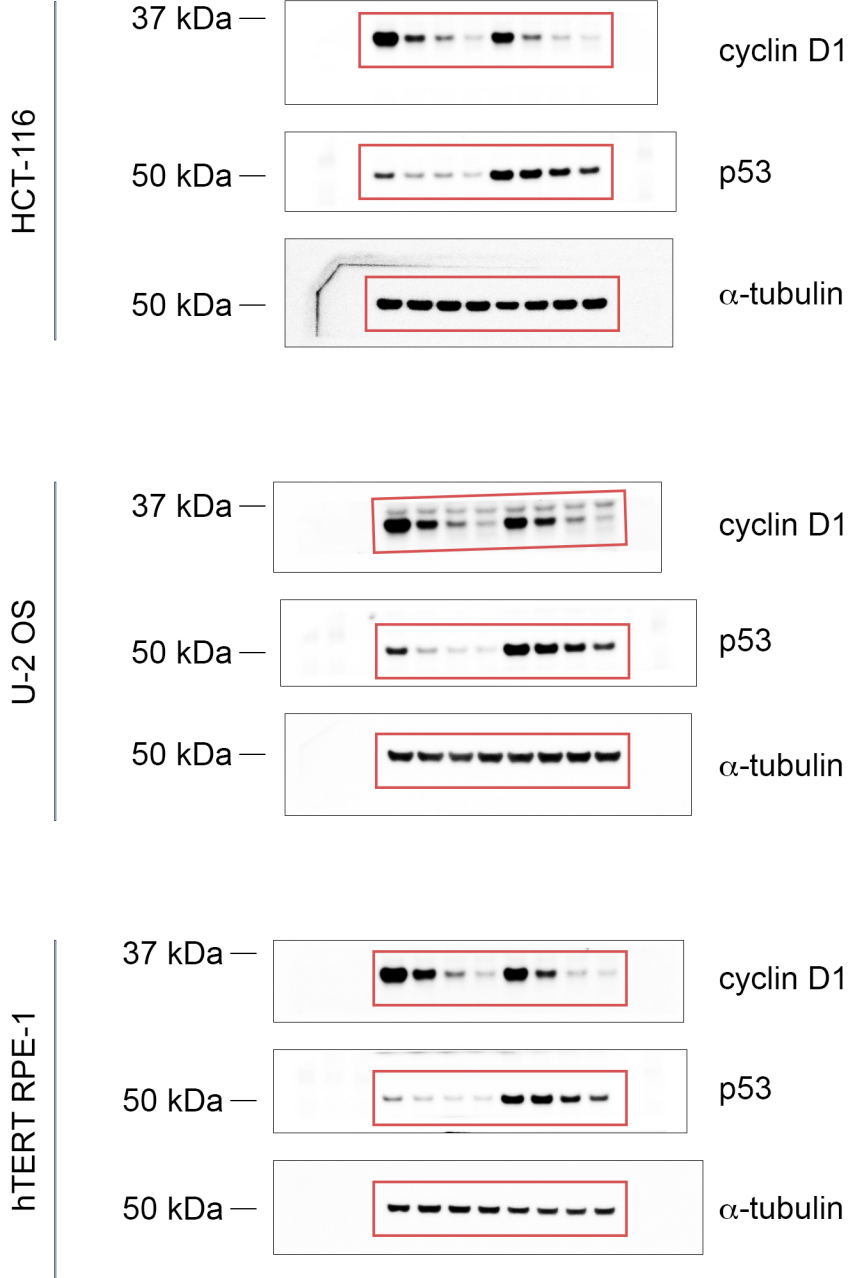



# Extended Data Figure 6k

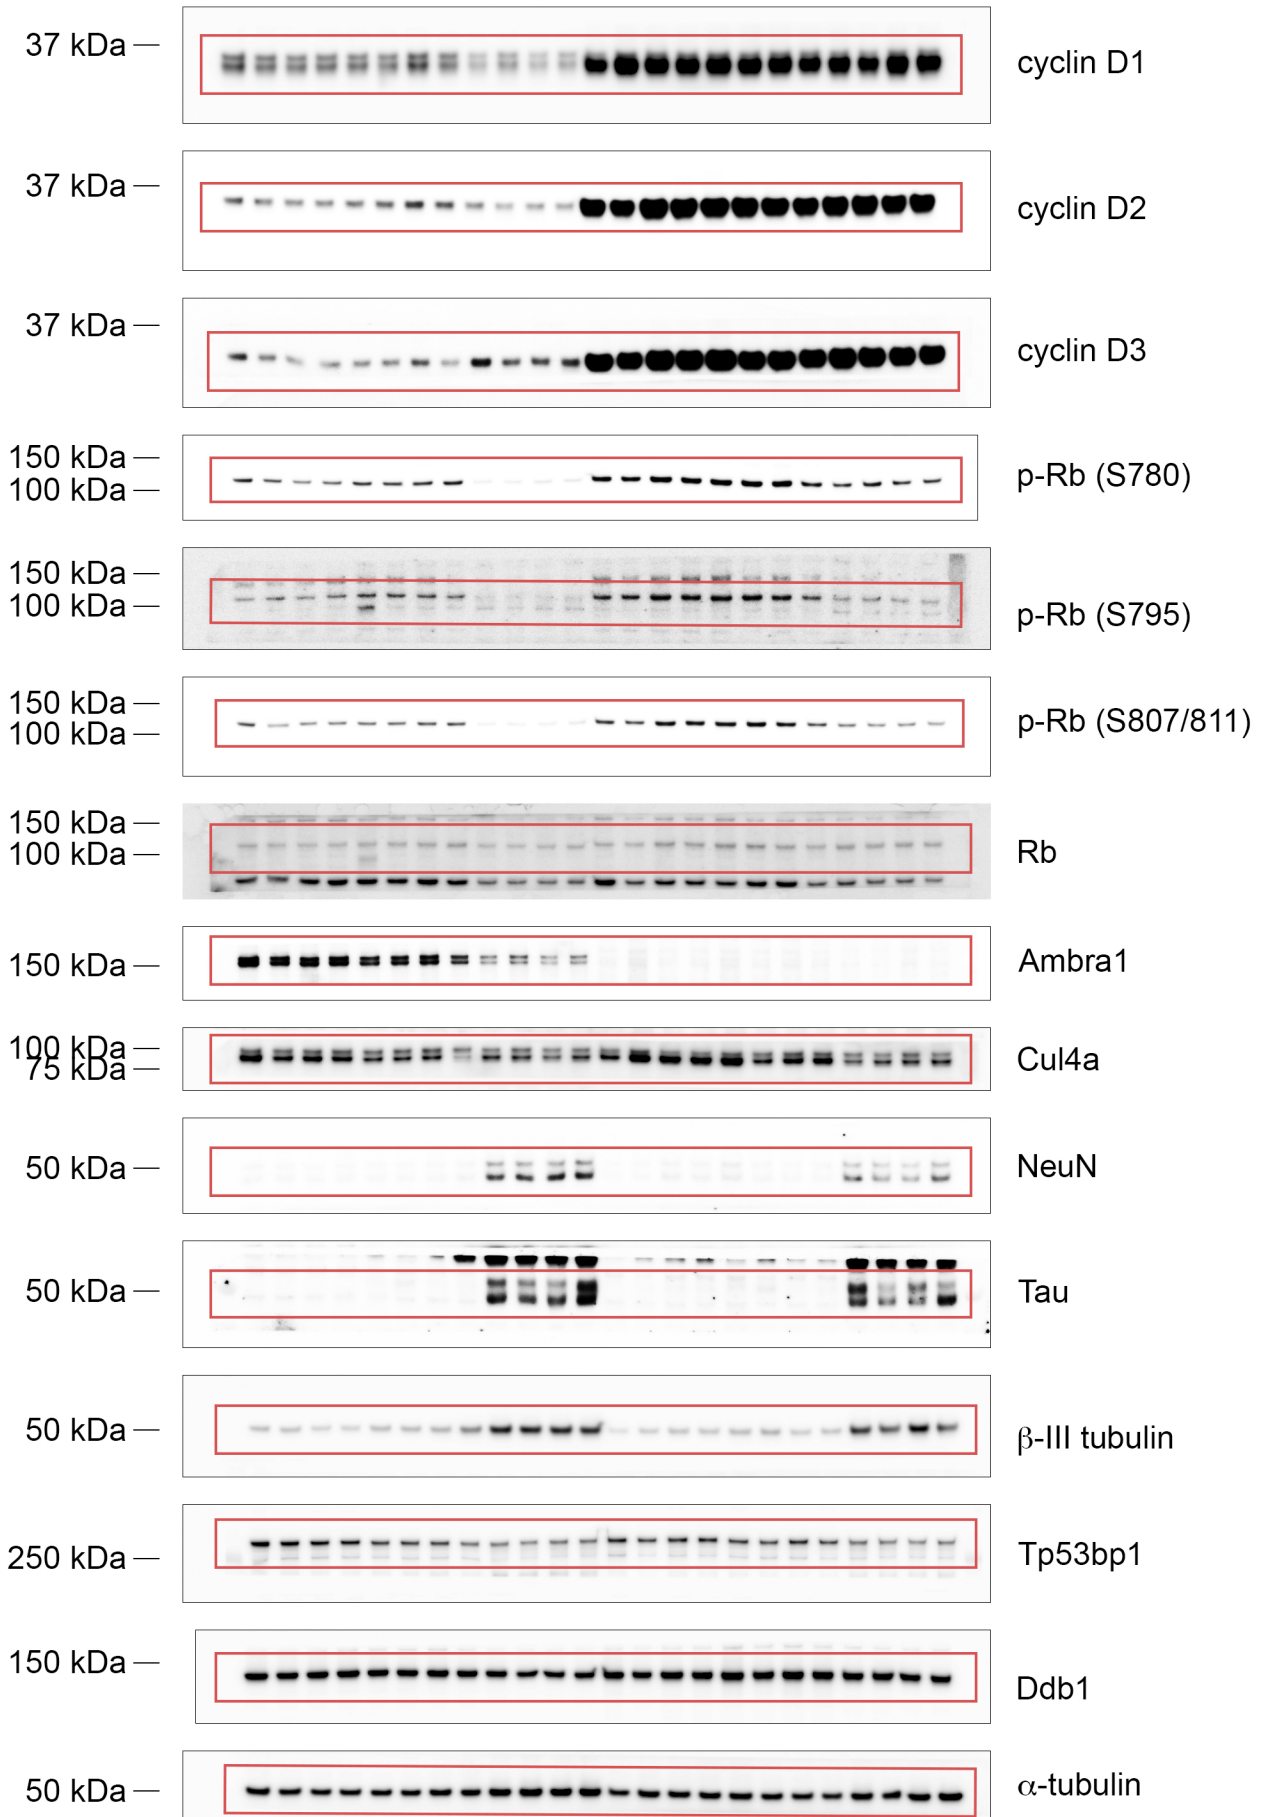

### Extended Data Figure 10h

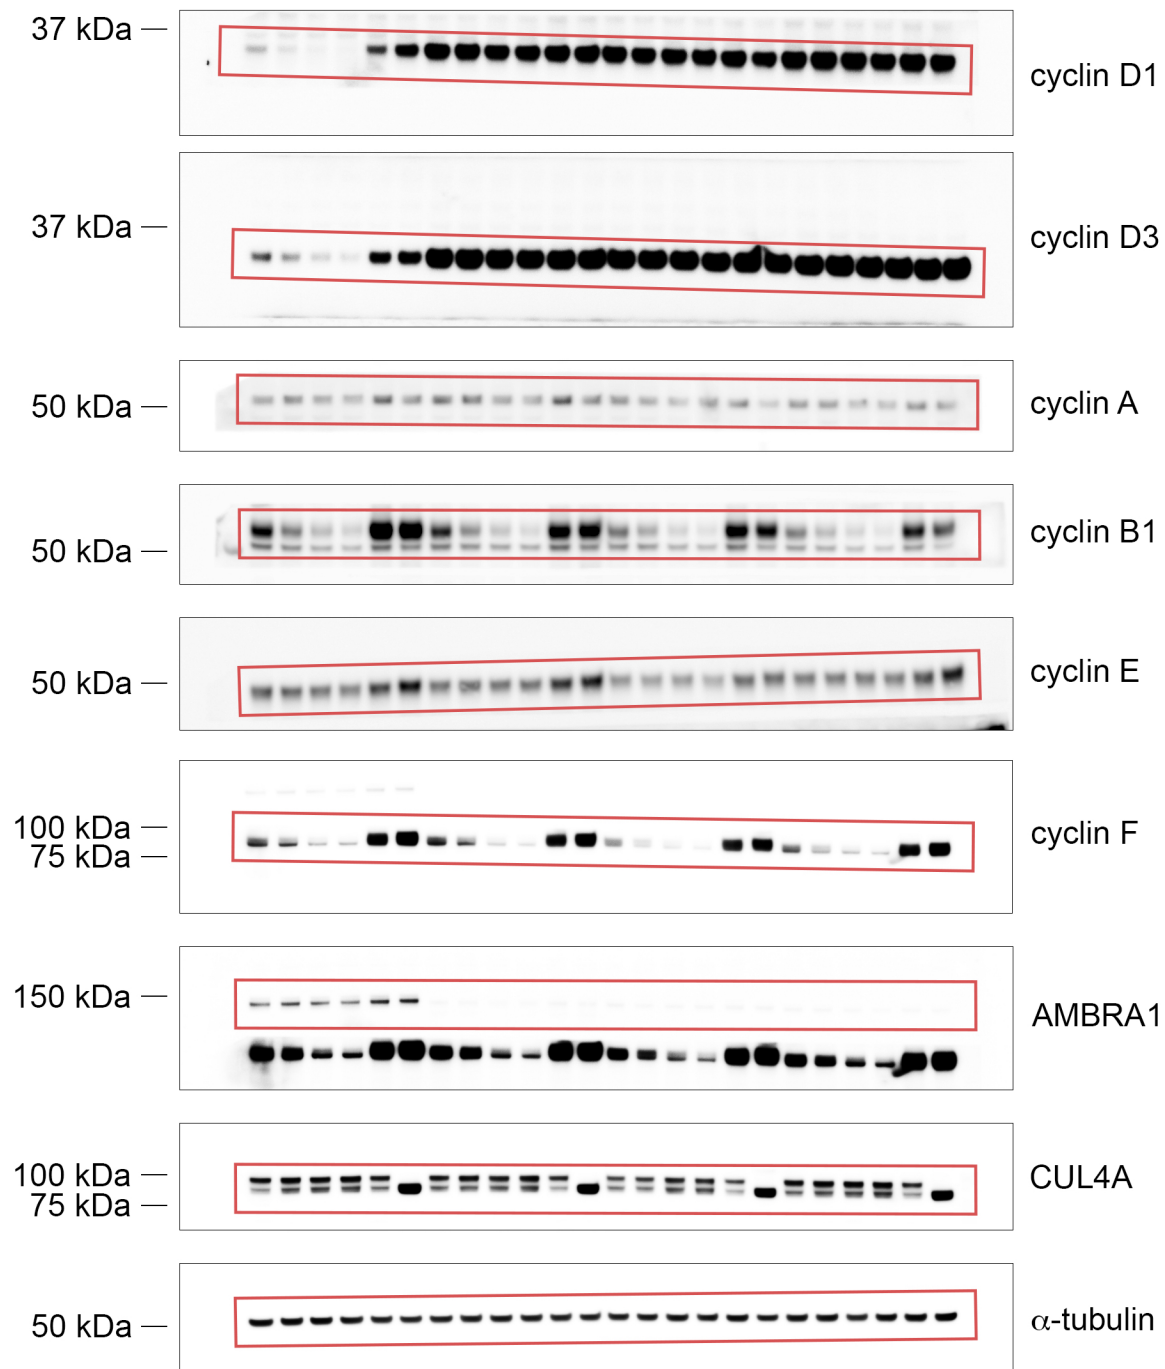

**Extended Data Figure 10k**

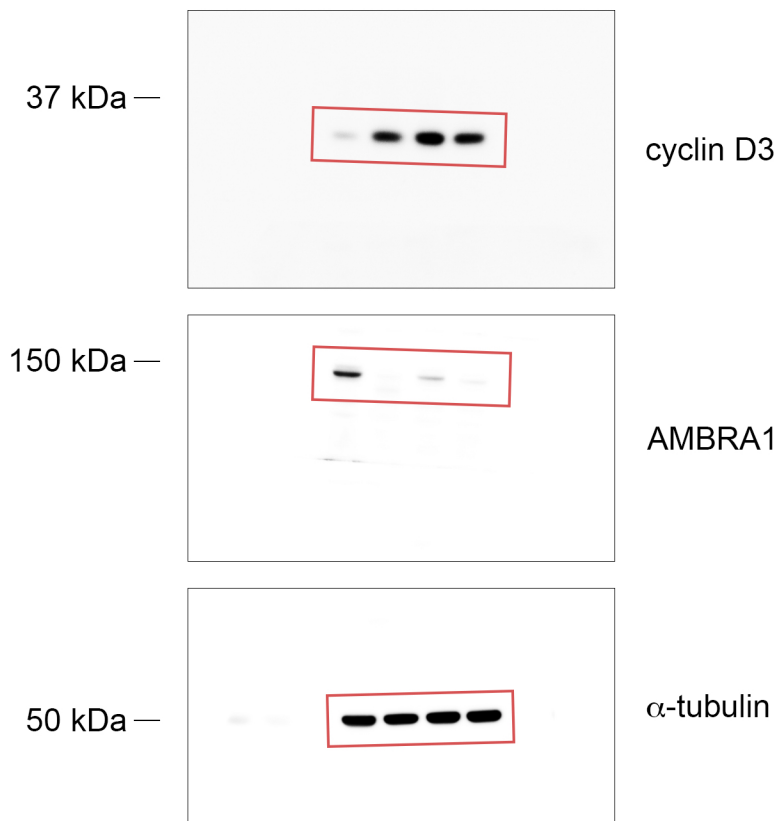

**Extended Data Figure 11d**

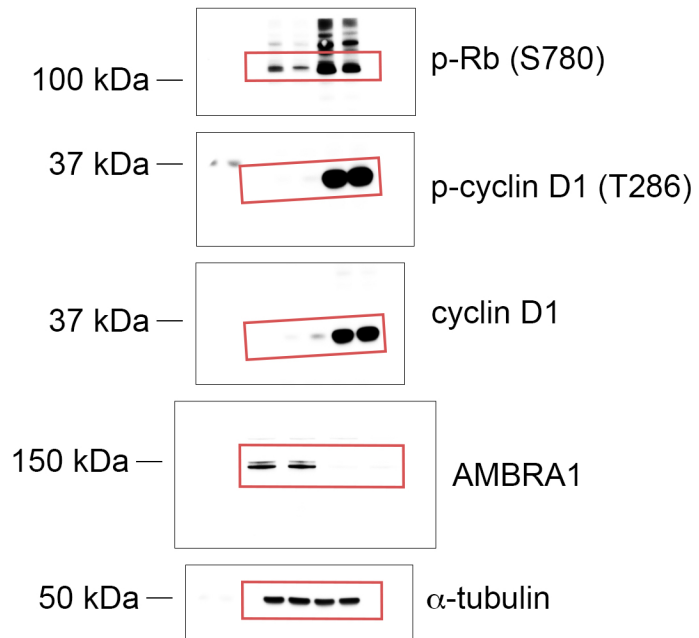

**Extended Data Figure 11e**

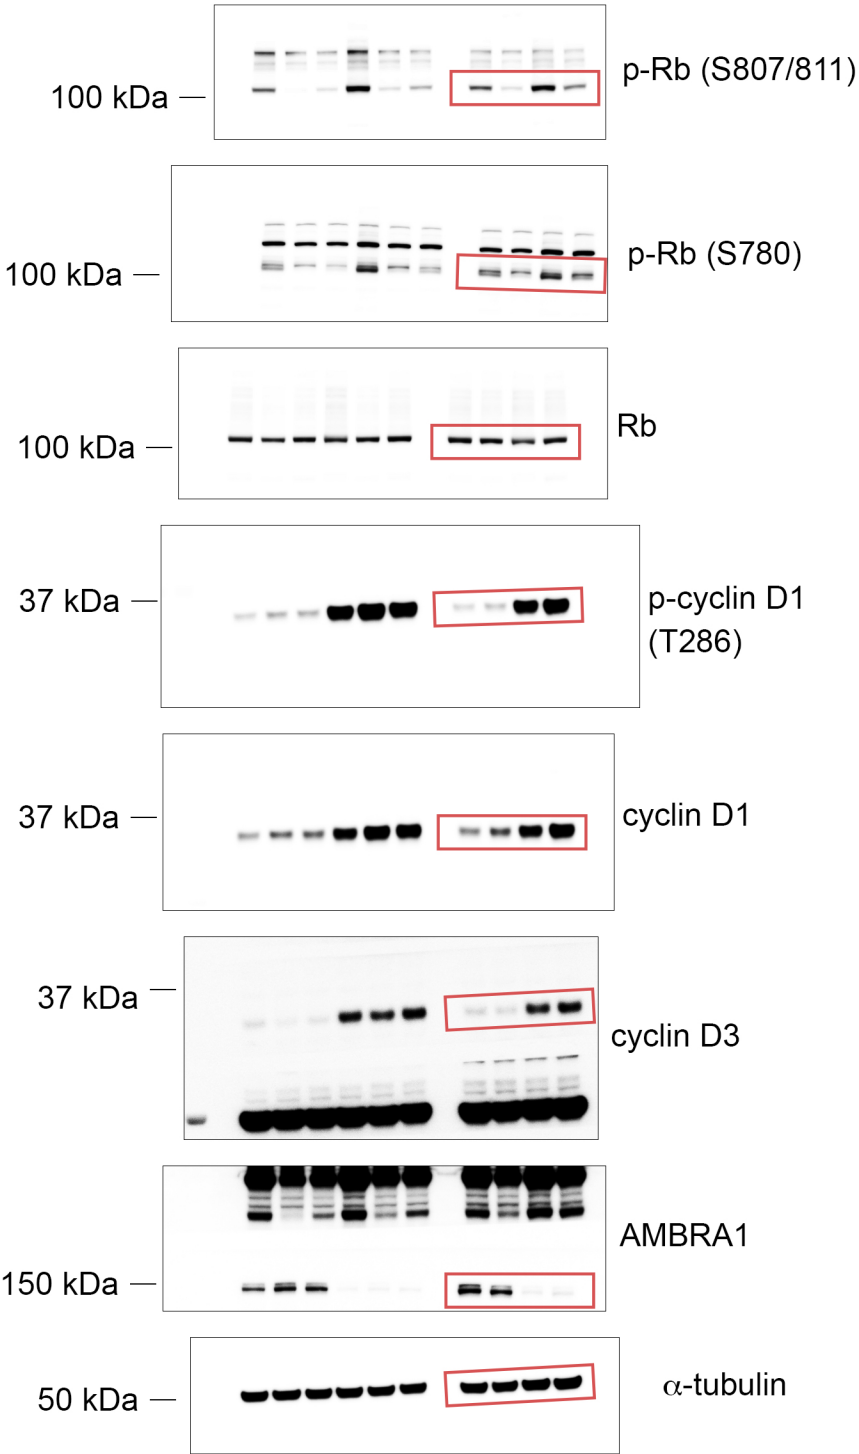



**Extended Data Figure 11f**

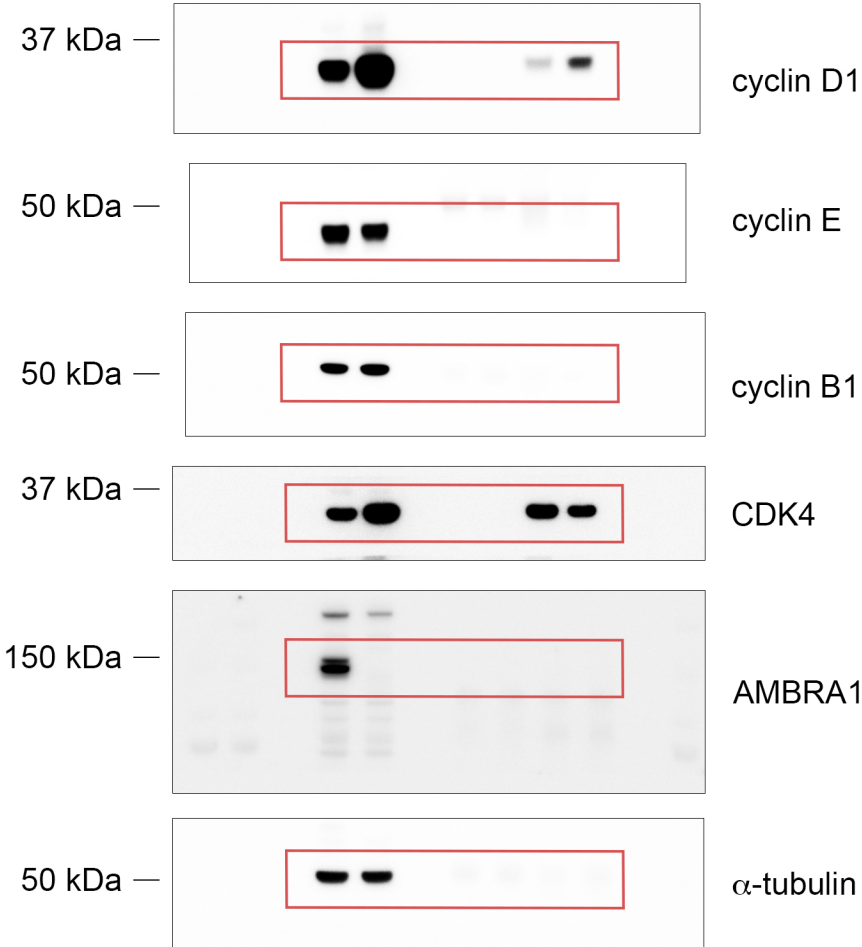

Extended Data Figure 11g

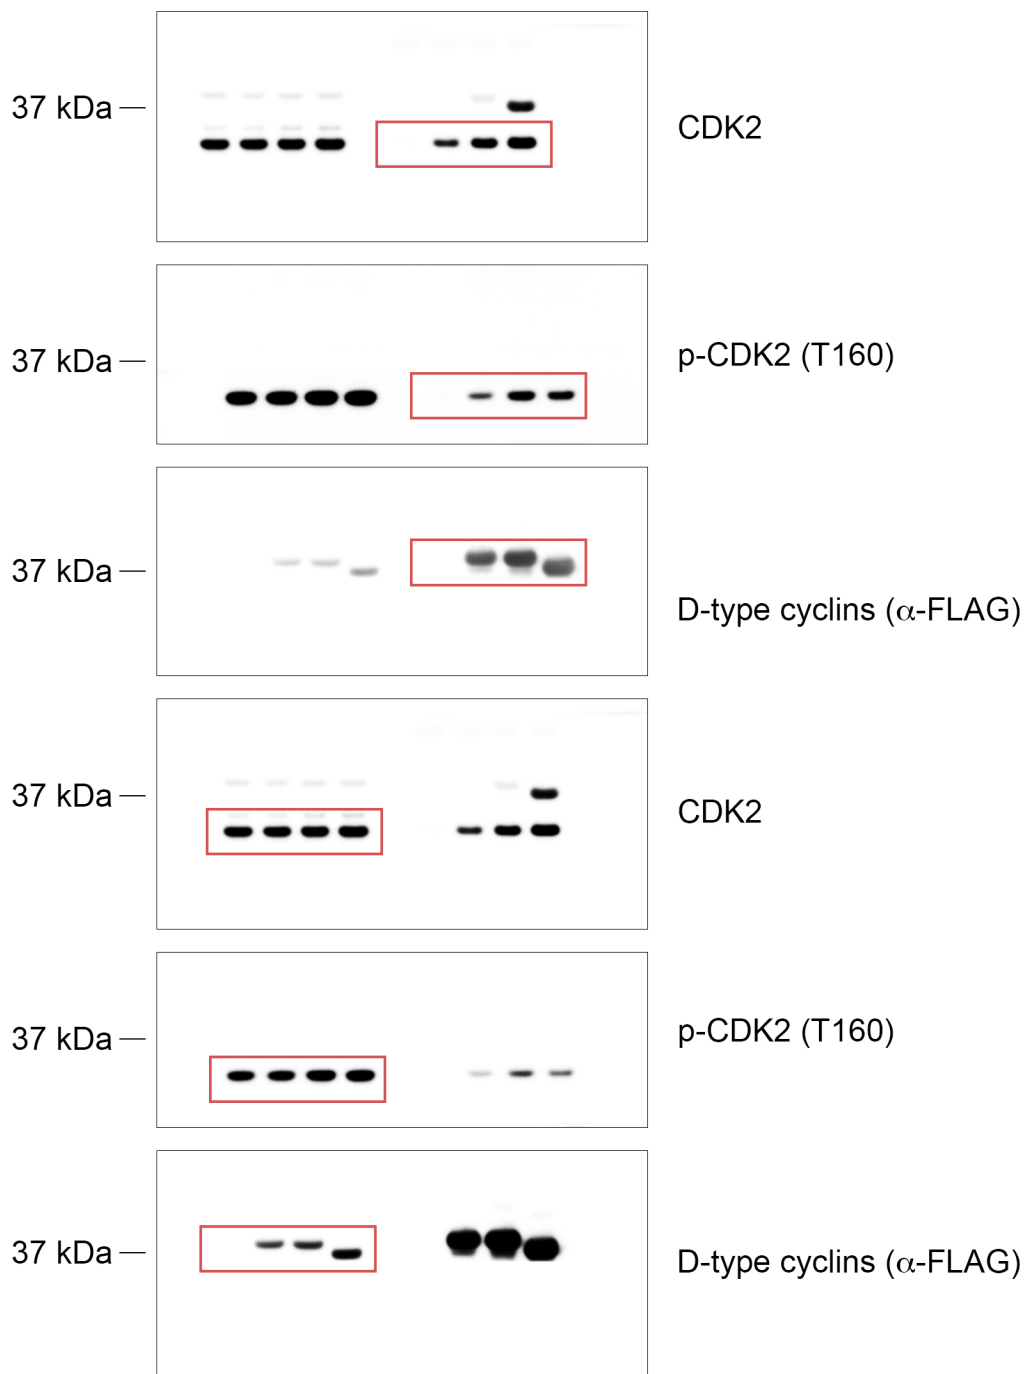

**Extended Data Figure 11h**

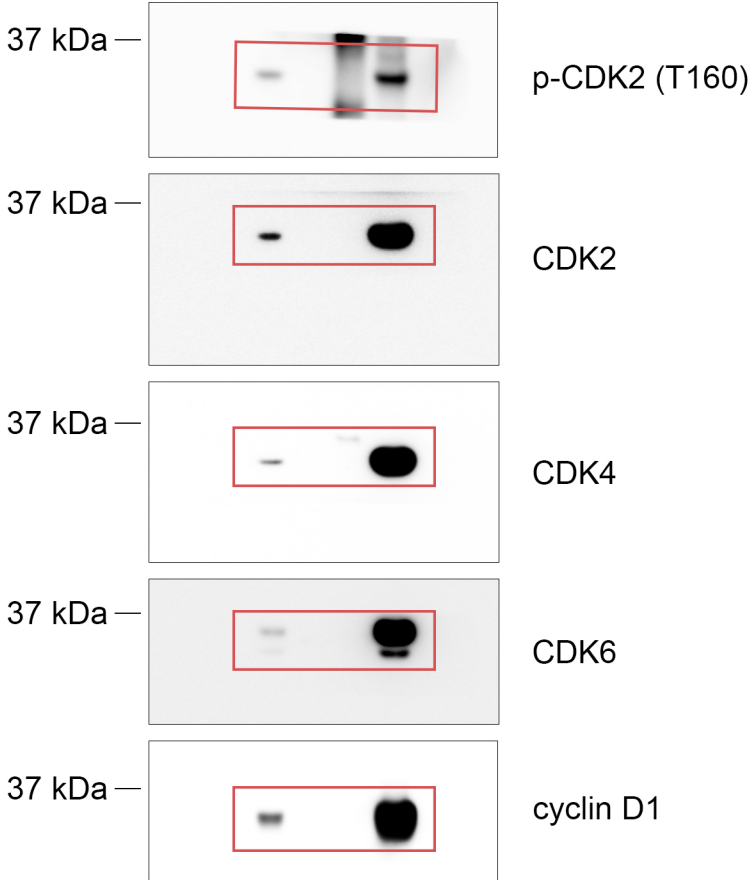

**Extended Data Figure 11i**

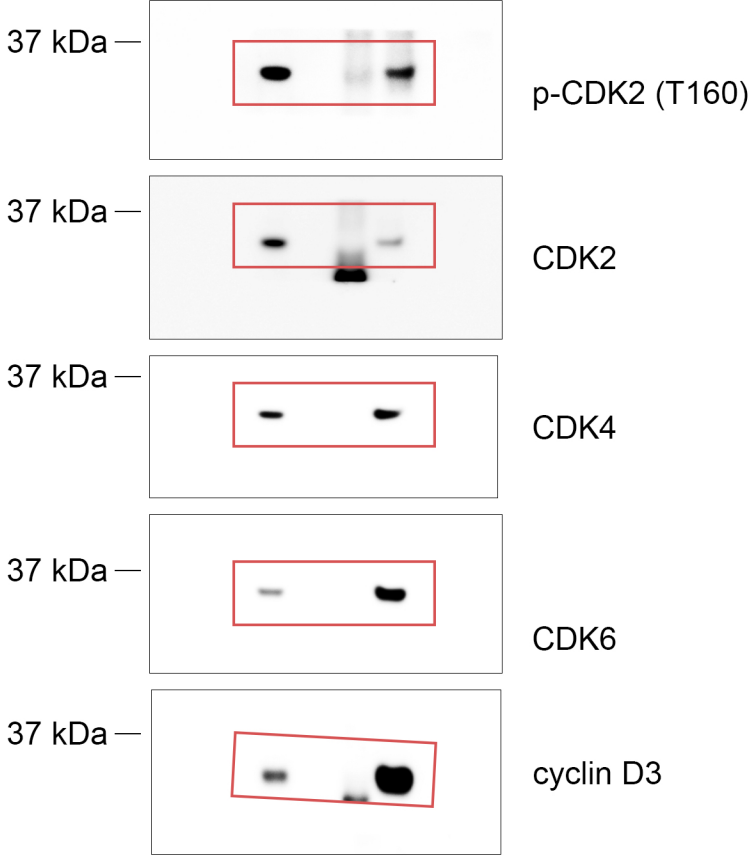

**Extended Data Figure 11j - see above**

**Extended Data Figure 12a - see above**

**Extended Data Figure 12b**

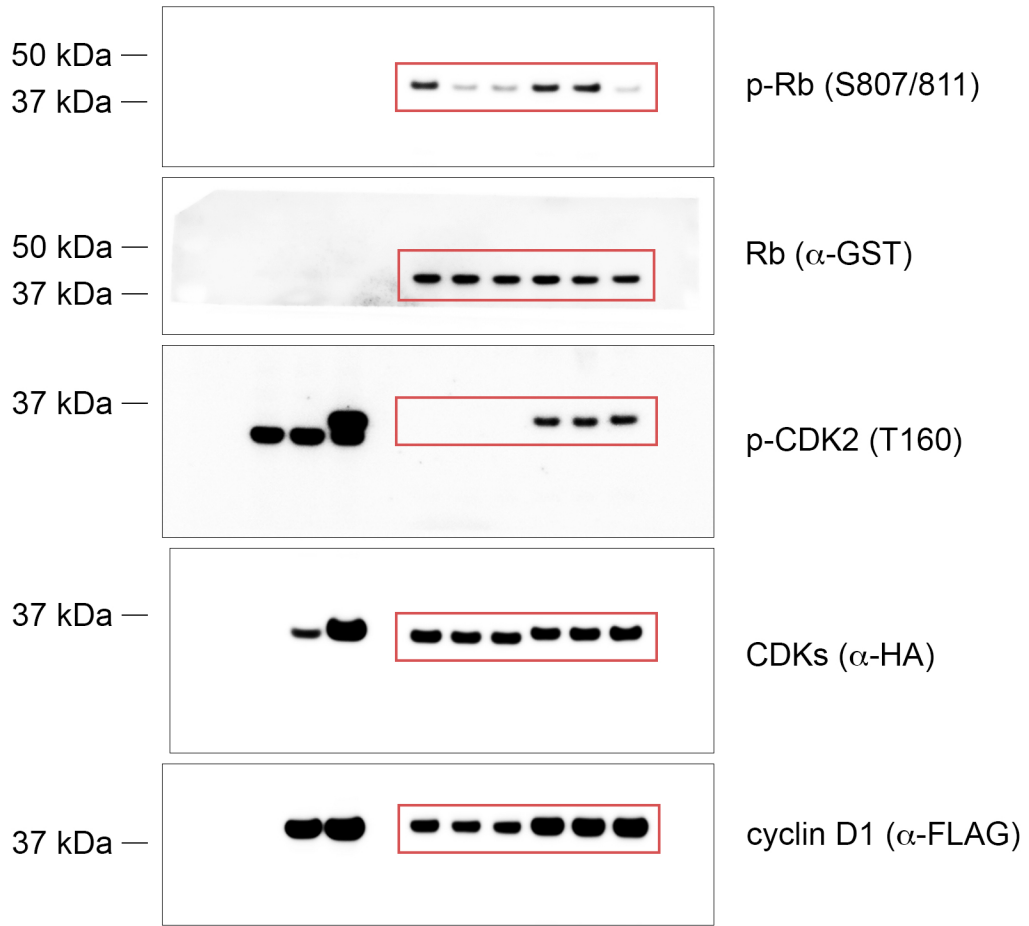

**Extended Data Figure 12c**

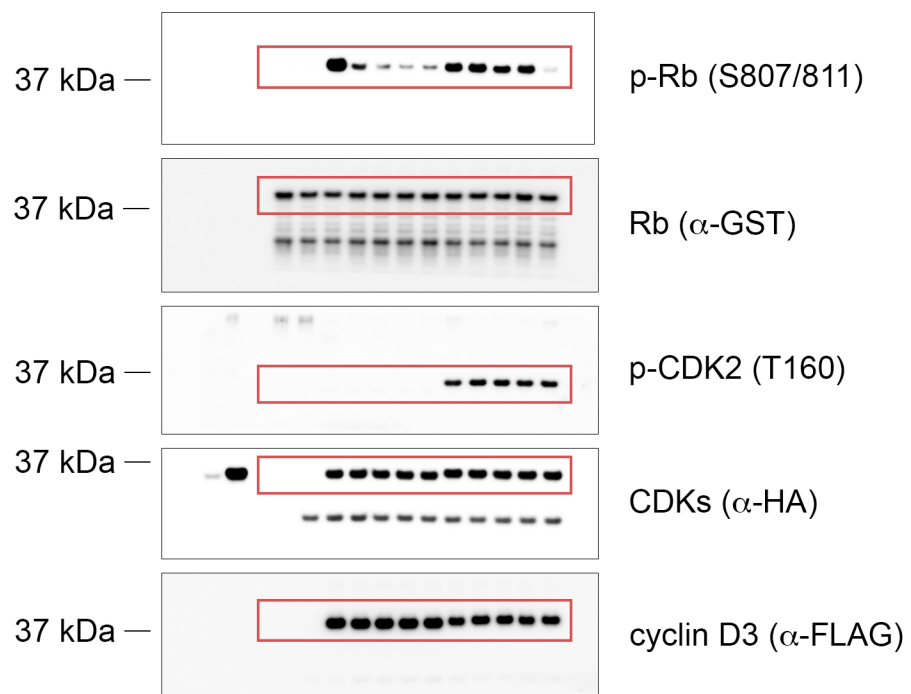

## Extended Data Figure 12e

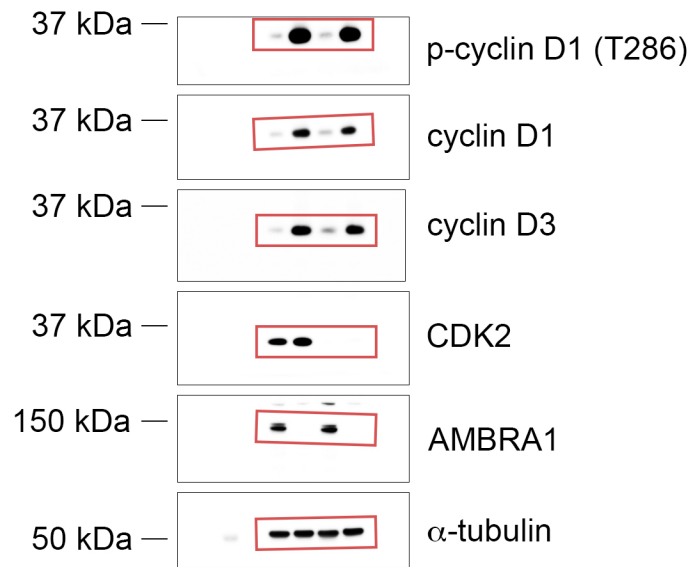

**Supplementary Figure 1** This file contains the full scanned images obtained by electrophoretic separation
