# Supplementary material
Source: PubMed Central journal article supplement (PMC8875297)
Supplement: NIHMS1776646-supplement-Sup_Fig__2.pdf [file NIHMS1776646-supplement-Sup_Fig__2.pdf]

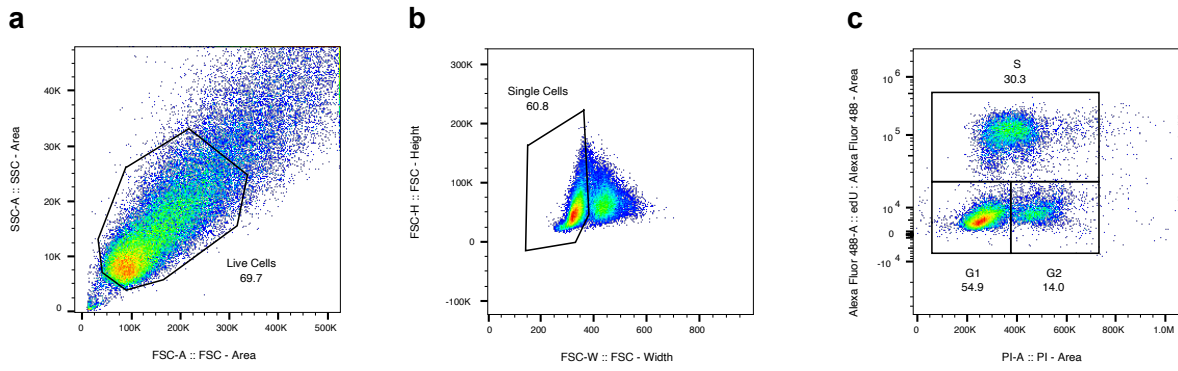

**Supplementary Figure 2.** Representative FACS gating strategy of live cells (a), singlets (b), and bivariate analysis of EdU-488 and propidium iodide (c) in HCT-116 cells, related to Figure 2e.

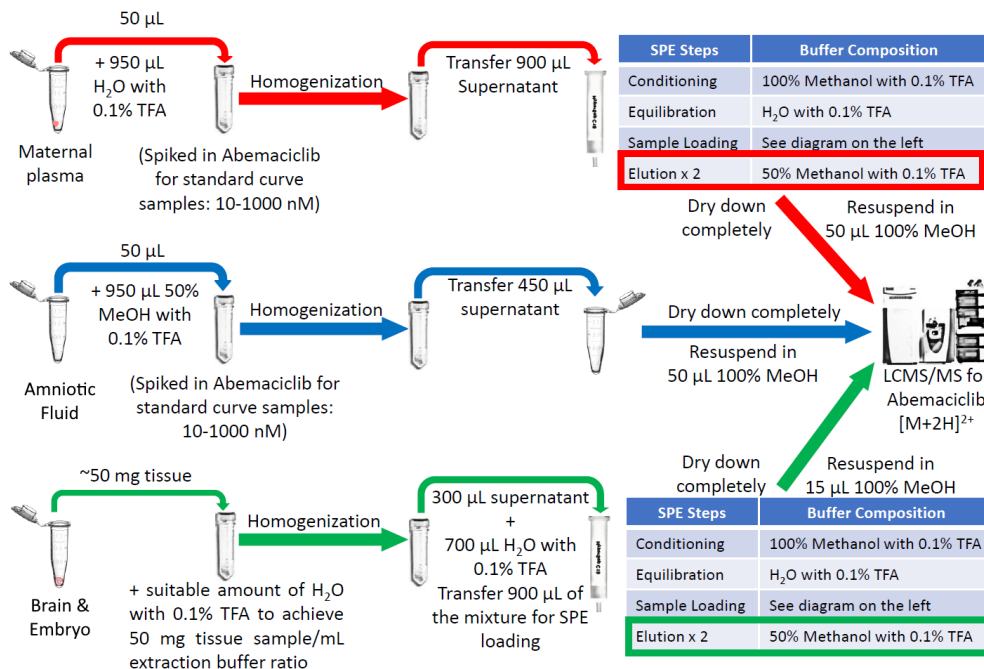

**Supplementary Figure 3.** Schematic flowchart of the protocol utilized for the identification of abemaciclib by LC-MS/MS from maternal plasma (red arrows), amniotic fluid (blue arrows), and maternal brain tissue and embryonic tissue (green arrow).

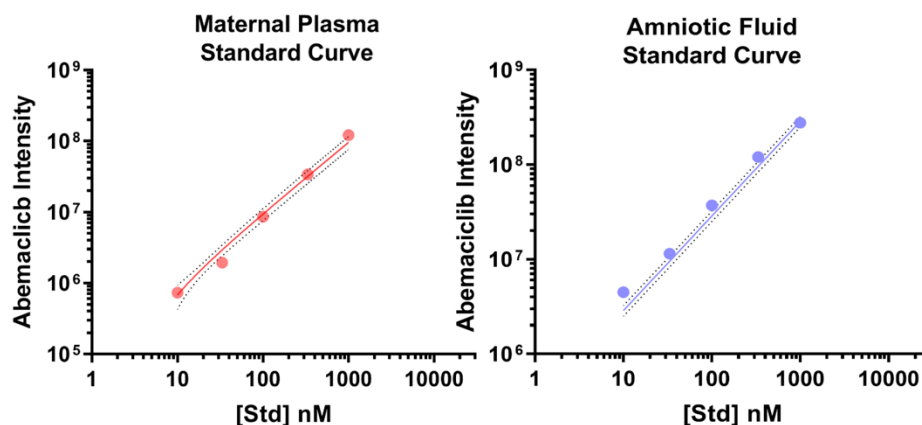

**Supplementary Figure 4.** Abemaciclib external standard curves (LC-MS/MS) for the matrix controls, generated by spiking abemaciclib from 10-1000 nM in maternal plasma (red line) and amniotic fluid (blue line) collected from vehicle-treated (phosphate-buffered saline, PBS) mice. Data are presented as mean values of duplicates  $\pm$  S.D. Error bars may not show if shorter than the size of the symbol. Dotted line represents 95% confidence interval for the line of regression.

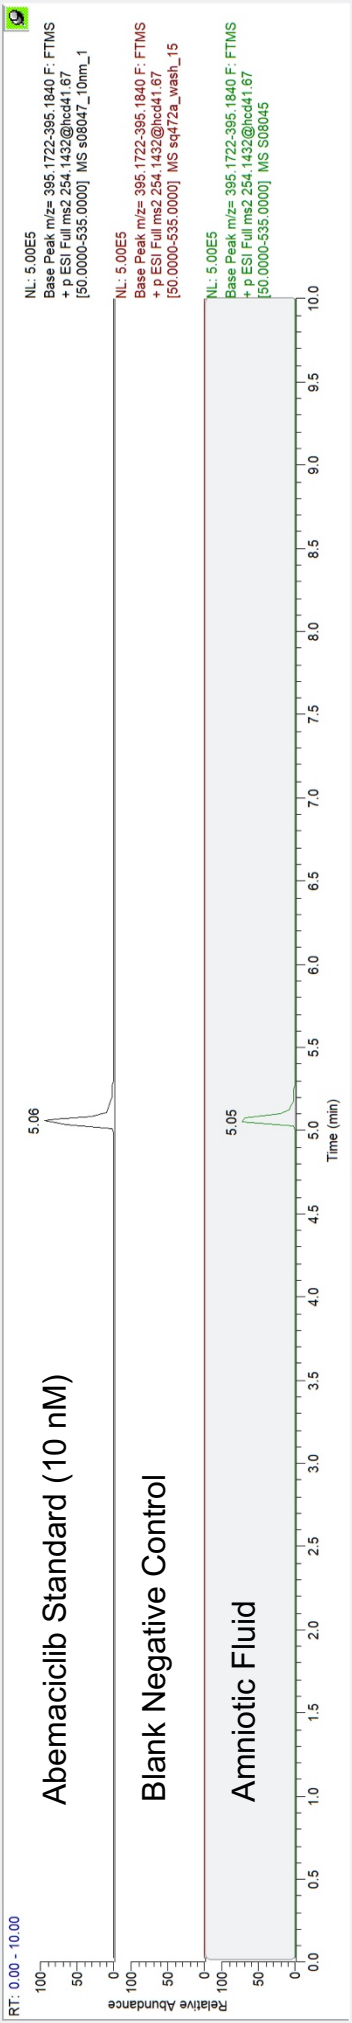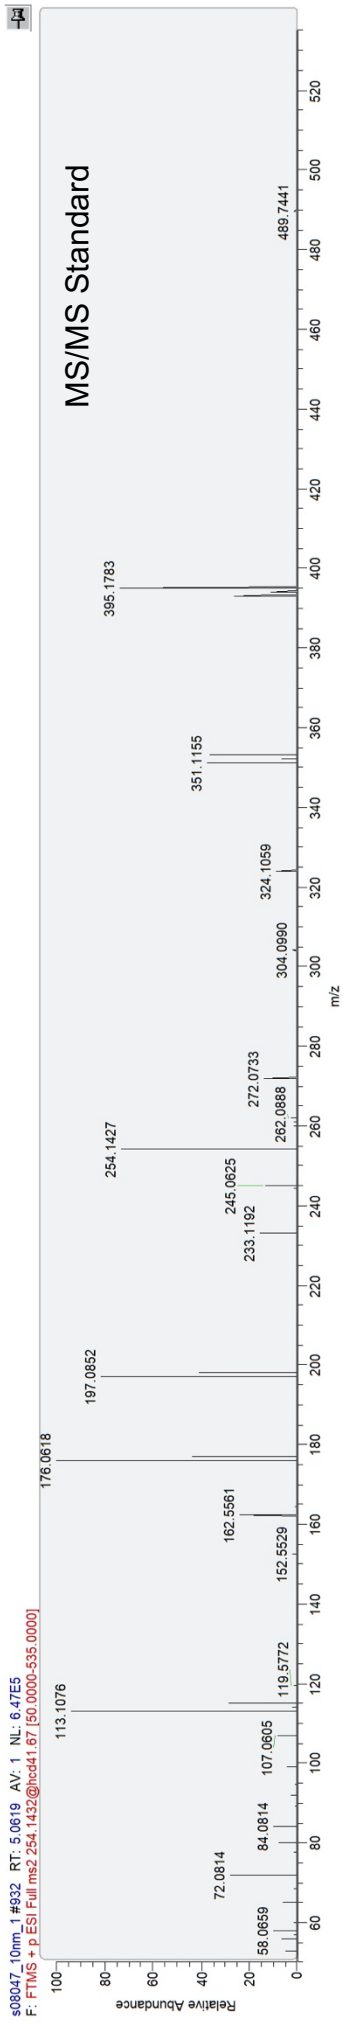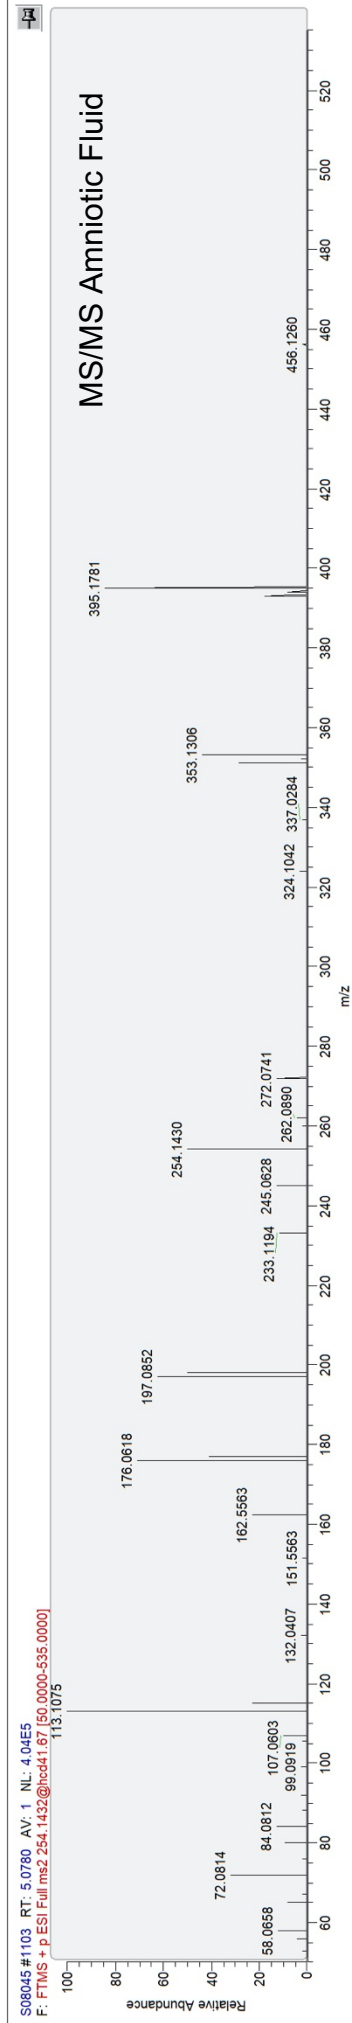

**Supplementary Figure 5.** Confirmation of abemaciclib structure identification and detection in amniotic fluid by LC-MS/MS. *Top* – Extracted ion chromatograms of a targeted PRM scan for abemaciclib in an authentic standard (black trace), blank control (red trace), and representative amniotic fluid sample (green trace). All traces are on a fixed intensity scale ( $5e5$ ), and represent the characteristic fragment ion at 395.1790 m/z (theoretical) resulting from the fragmentation of the alkyl piperazine ( $C_6H_{13}N_2$ , 113.1073 m/z). *Middle* – Tandem MS spectrum of the authentic standard (10 nM) for abemaciclib (black trace, 5.06 min). *Bottom* – Tandem MS spectrum of the peak detected in a representative amniotic fluid sample (100 mg/kg dose).

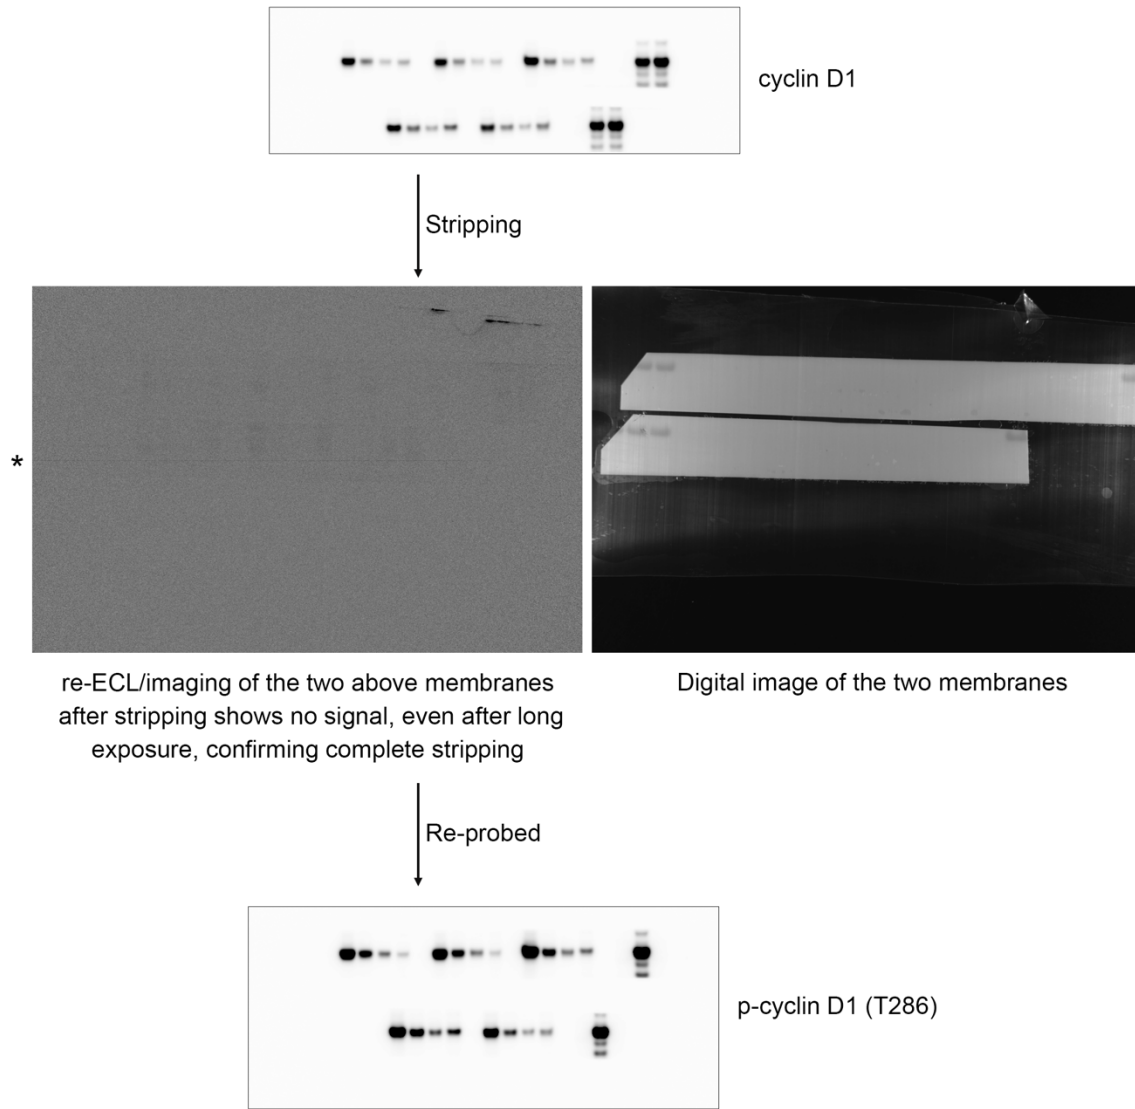

**Supplementary Figure 6.** Representative image of two immunoblotted PVDF membranes probed first with an  $\alpha$ -cyclin D1 antibody, stripped with stripping buffer, and reblotted with an  $\alpha$ -phospho-cyclin D1 (T286) antibody (see Extended Data Fig. 4n). Re-ECL and imaging of the stripped membranes was performed to confirm stripping efficiency. The asterisk (\*) indicates a row of dead pixels from the CCD camera of the chemiluminescent imager.
